# Supplementary material for: Total structure determination of surface doping [Ag46Au24(SR)32](BPh4)2 nanocluster and its structure-related catalytic property
Source: PubMed Central journal article supplement — Sci Adv. 2015 Aug 14;1(7):e1500441. doi: 10.1126/sciadv.1500441 (PMC4643804; doi:10.1126/sciadv.1500441), 2015-08-14
Supplement: 1500441_SM.pdf [file 1500441_SM.pdf]

## Supplementary Materials for

### Total structure determination of surface doping $[\text{Ag}_{46}\text{Au}_{24}(\text{SR})_{32}](\text{BPh}_4)_2$ nanocluster and its structure-related catalytic property

Shuxin Wang, Shan Jin, Sha Yang, Shuang Chen, Yongbo Song, Jun Zhang, Manzhou Zhu

Published 14 August 2015, *Sci. Adv.* **1**, e1500441 (2015)

DOI: 10.1126/sciadv.1500441

#### This PDF file includes:

##### Materials

Fig. S1.  $^1\text{H}$  NMR spectrum of  $[\text{Ag}_{46}\text{Au}_{24}(\text{S}'\text{Bu})_{32}](\text{BPh}_4)_2$  nanoclusters (single crystal dissolved in  $\text{CD}_2\text{Cl}_2$ ).

Fig. S2. Typical TEM images and cluster size distributions of (a)  $\text{Au}_{25}/\text{CNT}$ , (b)  $\text{Ag}_{44}/\text{CNT}$ , (c)  $\text{Ag}_{32}\text{Au}_{12}/\text{CNT}$ , (d)  $\text{Ag}_{46}\text{Au}_{24}/\text{CNT}$  before reaction.

Fig. S3. Typical TEM images and cluster size distributions of (a)  $\text{Au}_{25}/\text{CNT}$ , (b)  $\text{Ag}_{44}/\text{CNT}$ , (c)  $\text{Ag}_{32}\text{Au}_{12}/\text{CNT}$ , (d)  $\text{Ag}_{46}\text{Au}_{24}/\text{CNT}$  after reaction.

Fig. S4. The digital photo of the  $[\text{Ag}_{46}\text{Au}_{24}(\text{S}'\text{Bu})_{32}](\text{BPh}_4)_2$  crystals.

Fig. S5. The UV-Vis spectra of (a)  $\text{Au}_{25}(\text{SC}_2\text{H}_4\text{Ph})_{18}^-$ ; (b)  $\text{Ag}_{44}(\text{SPhF}_2)_{30}^{4-}$ ; (c)  $\text{Ag}_{32}\text{Au}_{12}(\text{SPhF}_2)^{4-}$ ; (d)  $[\text{Ag}_{46}\text{Au}_{24}(\text{S}'\text{Bu})_{32}](\text{BPh}_4)_2$  nanoclusters dissolved in dichloromethane solution.

Table S1. Crystal data and structure refinement for  $[\text{Ag}_{46}\text{Au}_{24}(\text{S}'\text{Bu})_{32}](\text{BPh}_4)_2$  nanoclusters.

Table S2. Atomic coordinates ( $\times 10^4$ ) and equivalent isotropic displacement parameters ( $\text{\AA}^2 \times 10^3$ ) for  $[\text{Ag}_{46}\text{Au}_{24}(\text{S}'\text{Bu})_{32}](\text{BPh}_4)_2$  ( $\text{BPh}_4$ )<sub>2</sub>.

Table S3. Bond lengths ( $\text{\AA}$ ) and angles ( $^\circ$ ) for  $[\text{Ag}_{46}\text{Au}_{24}(\text{S}'\text{Bu})_{32}](\text{BPh}_4)_2$  nanoclusters.

Table S4. Anisotropic displacement parameters ( $\text{\AA}^2 \times 10^3$ ) for  $[\text{Ag}_{46}\text{Au}_{24}(\text{S}'\text{Bu})_{32}](\text{BPh}_4)_2$ .

## Materials.

Unless specified, reagents were purchased from ACROS Organics or Sigma-Aldrich and used without further purification. Tetrachloroauric(III) acid ( $\text{HAuCl}_4 \cdot 3\text{H}_2\text{O}$ , >99.99% metals basis), and  $\text{AgNO}_3$  (>98%) were received from ACROS Organic. Toluene (HPLC grade,  $\geq 99.9\%$ , Sigma-Aldrich), Ethanol (Reagent Alcohol, 95%), Methanol (HPLC grade,  $\geq 99.9\%$ ), Methylene chloride (HPLC grade,  $\geq 99.9\%$ ), all kinds of thiol and multi-walled carbon nanotube were from Sigma-Aldrich. Pure water was ordered from Wahaha Co LTD.

**Synthesis of  $[\text{Ag}_{46}\text{Au}_{24}(\text{S}'\text{Bu})_{32}](\text{BPh}_4)_2$  nanocluster.**  $\text{AgNO}_3$  (20 mg, 0.078 mmol) was dissolved in methanol under vigorous stirring; then gold salt ( $\text{HAuCl}_4 \cdot 3\text{H}_2\text{O}$ , 19.7mg, 0.050 mmol) was added, and the solution turned from a colorless transparent solution to a yellow turbid liquid. 100  $\mu\text{l}$  tertiary butyl mercaptan was added, and then the yellow turbid liquid became white turbid after a few minutes. After that, 1mL NaOH aqueous solution (40 mg/mL) was added under vigorous stirring for the next 20 min. Then, 1mL  $\text{NaBH}_4$  aqueous solution (140 mg/mL) was added quickly. The color of solution immediately turned black and produced AgAu alloy nanoclusters, which were then precipitated out of the methanol solution. The reaction was aged for 6h at room temperature, and the black precipitate was collected by centrifugation (5min at  $\sim 6000$  rpm). The black precipitate was washed with excess hexane and collected by centrifugation again. This step was repeated at least 3 times to completely remove the residual free thiol. Then, toluene was used to separate the  $[\text{Au}_{24}\text{Ag}_{46}(\text{S}'\text{Bu})_{32}]^{2+}$  nanoclusters from the crude product. The by-products were soluble in toluene while  $[\text{Au}_{24}\text{Ag}_{46}(\text{S}'\text{Bu})_{32}]^{2+}$  nanoclusters were slightly soluble in toluene. Hence, they can be easily separated by centrifugation. The as-obtained nanoclusters redissolved in  $\text{CH}_2\text{Cl}_2$  were pure  $[\text{Au}_{24}\text{Ag}_{46}(\text{S}'\text{Bu})_{32}]^{2+}$ . A right amount of  $\text{NaBPh}_4$  dissolved in 5ml  $\text{CH}_3\text{OH}$  was added to replace the anion ( $\text{Cl}^-$ ) of  $[\text{Au}_{24}\text{Ag}_{46}(\text{S}'\text{Bu})_{32}]^{2+}$  nanoclusters (redissolved in 5ml  $\text{CH}_2\text{Cl}_2$ ), forming  $\text{Au}_{24}\text{Ag}_{46}(\text{S}'\text{Bu})_{32}(\text{BPh}_4)_2$  (back precipitate). Black block-like crystals (Fig. S4) were crystallized from  $\text{CH}_2\text{Cl}_2$ /hexane at room temperature. The yield of  $[\text{Ag}_{46}\text{Au}_{24}(\text{S}'\text{Bu})_{32}](\text{BPh}_4)_2$  was about 80% (Ag atom basis).

**Synthesis of other homometal or bi-metallic nanoclusters.** Other clusters including  $\text{Au}_{25}(\text{SR})_{18}^-$ ,  $\text{Ag}_{32}\text{Au}_{12}(\text{SR})_{30}^{4-}$  and  $\text{Ag}_{44}(\text{SR})_{30}^{4-}$  were synthesized and crystallized by the reported methods.<sup>34,37</sup>

**Preparation of catalysts.** The multiwalled carbon nanotube (CNT) (10mg) was dispersed in toluene (10mL) and a calculated amount (0.1 wt%) of cluster (Note: single crystals were used as the source for each experiment) was added to the suspension of CNT under vigorous magnetic stirring. After proceeding overnight, the product was separated from the solution by centrifugation and dried in vacuum for 12 h. Calcination of the  $\text{Au}_{25}\text{:SR/CNT}$ ,  $\text{Ag}_{44}\text{:SR/CNT}$  and  $\text{Ag}_{46}\text{Au}_{24}\text{/CNT}$  composites was performed in a quartz-tube oven under vacuum conditions at  $200^\circ\text{C}$  for 2h to remove the ligands.

**Catalytic activity and selectivity in styrene oxidization.** Ethanol (1.5mL), nanoclusters@CNT catalysis (20 mg, 2wt% particle loading), 57ul (0.5mmol) styrene were mixed in a 10mL round-bottom flask and heated to  $65^\circ\text{C}$  followed by the addition of  $\sim 144\mu\text{l}$  (1.5mmol) *t*-butylhydrogenperoxide (TBHP). After  $\sim 24\text{h}$ , the reaction was stopped and the product was analyzed by gas chromatography (GC)-MS.

**Structure determination.** The data collection for single crystal X-ray diffraction was carried out on a Bruker Smart APEX II CCD diffractometer at 150 K, using a Mo-K $\alpha$  radiation ( $\lambda = 0.71073 \text{ \AA}$ ). Data reductions and absorption corrections were performed using the SAINT and SADABS programs, respectively.<sup>S1</sup> The structure was solved by direct methods and refined with full-matrix least squares on  $F^2$  using the SHELXTL software package.<sup>S2</sup> All non-hydrogen atoms were refined anisotropically, and all the hydrogen atoms were set in geometrically calculated positions and refined isotropically

using a riding model.

**Crystal data for  $[\text{Ag}_{46}\text{Au}_{24}(\text{S}'\text{Bu})_{32}](\text{BPh}_4)_2$  nanocluster.** Space group P21/C,  $a = 30.009(3)$  Å,  $b = 23.247(2)$  Å,  $c = 42.895(3)$  Å,  $\alpha = 90.00^\circ$ ,  $\beta = 92.630(3)^\circ$ ,  $\gamma = 90.00^\circ$ ,  $V = 29893(5)$  Å<sup>3</sup>,  $T = 150(2)$  K,  $Z = 4$ , 295735 reflections measured, 61987 unique reflections ( $R_{\text{int}}=0.0597$ ), final  $R_1 = 0.0584$  and  $wR_2 = 0.1434$  for 48692 observed reflections ( $I > 2\sigma(I)$ ). All of the refinement parameters are summarized in Table S1-S4.

**Optical absorption spectroscopy.** All UV-Vis spectra of as-synthesized nanoclusters were obtained using an Agilent 8453 instrument, and solution samples were prepared using  $\text{CH}_2\text{Cl}_2$  as the solvent.

**NMR analysis.** NMR measurements were performed on a Bruker Avance™ II 400 NMR instrument operating at 400 MHz for  $^1\text{H}$ . The data was collected with  $\sim 5$  mg  $[\text{Ag}_{46}\text{Au}_{24}(\text{S}'\text{Bu})_{32}](\text{BPh}_4)_2$  clusters dissolved in 0.8 mL  $\text{CD}_2\text{Cl}_2$ .

**TEM imaging.** The transmission electron microscopy (TEM) images were obtained using a JEM 2100 microscopy. The operating voltage was 200 kV.

S1. APEX II software suite, Bruker-AXS, 2006.

S2. SHELXTL, G. M. Sheldrick, *Acta Crystallogr.*, A **64**, 112 (2008).

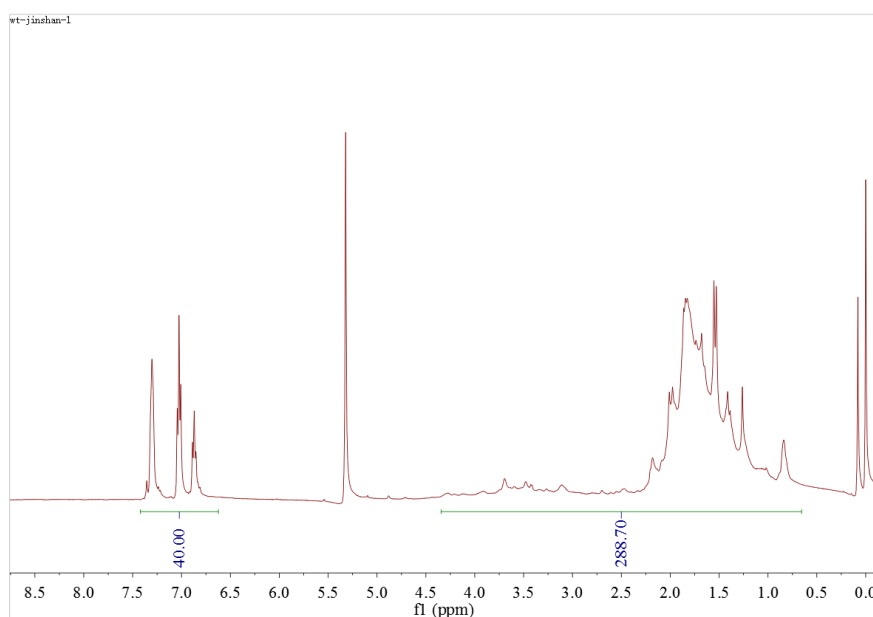

**Fig. S1.**  $^1\text{H}$  NMR spectrum of  $[\text{Ag}_{46}\text{Au}_{24}(\text{S}'\text{Bu})_{32}](\text{BPh}_4)_2$  nanoclusters (single crystal dissolved in  $\text{CD}_2\text{Cl}_2$ ).



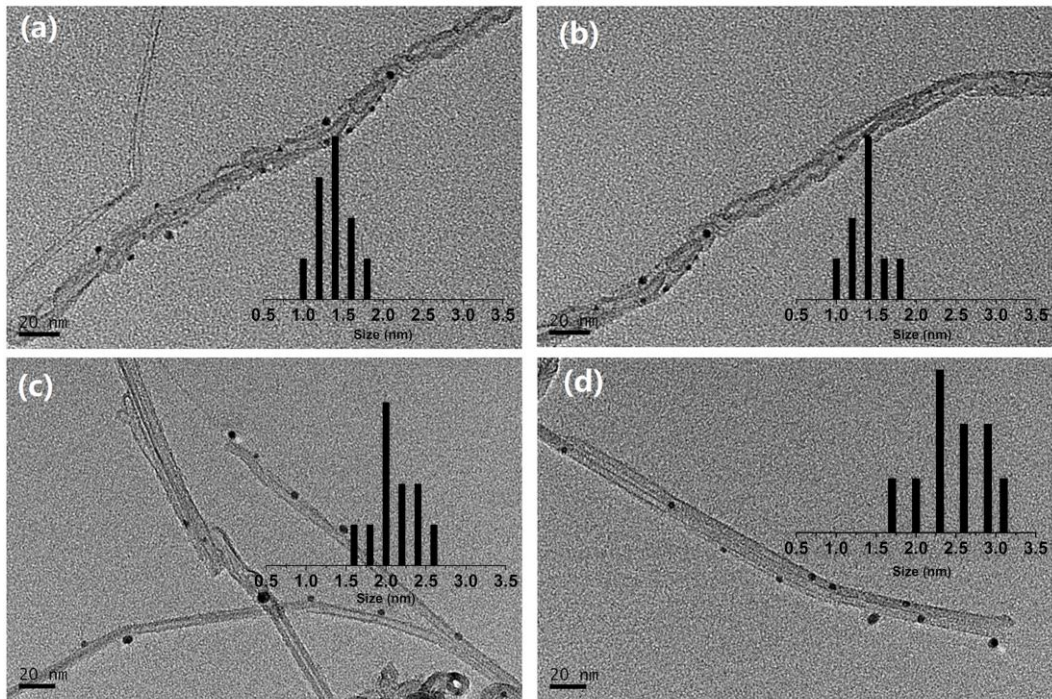

**Fig. S2.** Typical TEM images and cluster size distributions of (a) Au<sub>25</sub>/CNT, (b) Ag<sub>44</sub>/CNT, (c) Ag<sub>32</sub>Au<sub>12</sub>/CNT, (d) Ag<sub>46</sub>Au<sub>24</sub>/CNT before reaction.

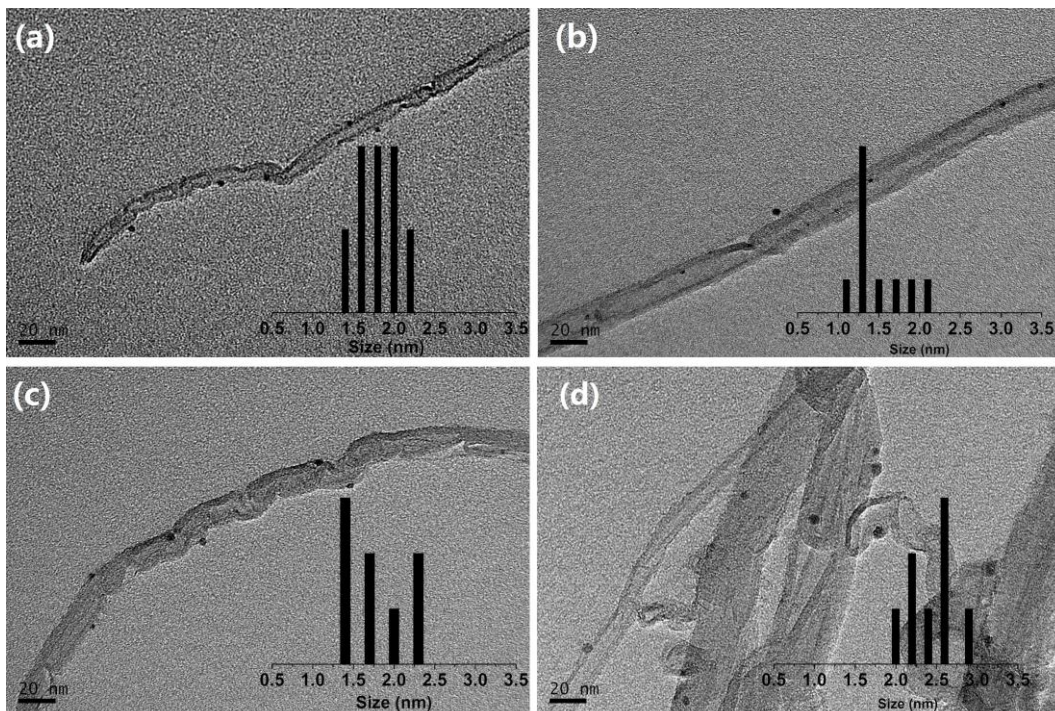

**Fig. S3.** Typical TEM images and cluster size distributions of (a) Au<sub>25</sub>/CNT, (b) Ag<sub>44</sub>/CNT, (c) Ag<sub>32</sub>Au<sub>12</sub>/CNT, (d) Ag<sub>46</sub>Au<sub>24</sub>/CNT after reaction.

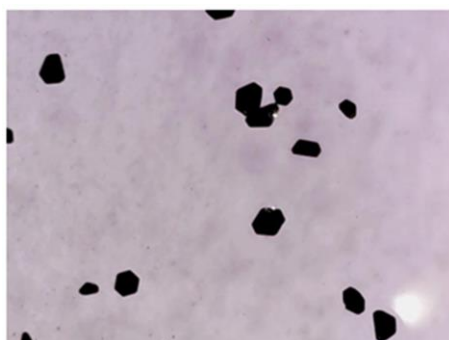

**Fig. S4.** The digital photo of the  $[\text{Ag}_{46}\text{Au}_{24}(\text{S}'\text{Bu})_{32}](\text{BPh}_4)_2$  crystals.

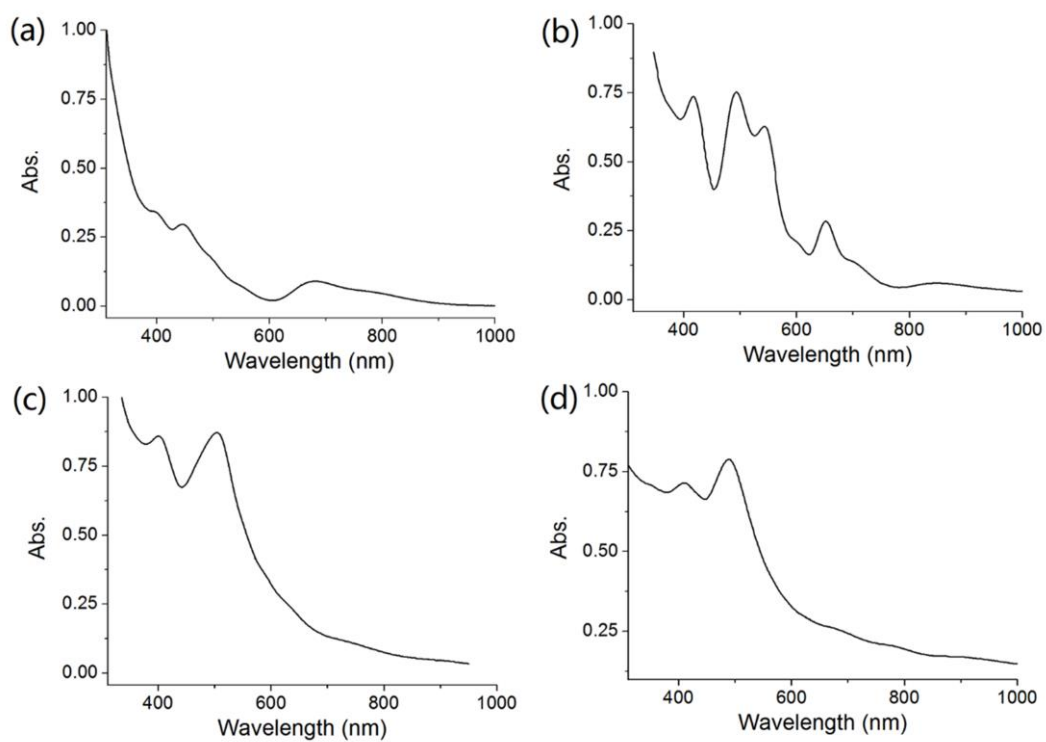

**Fig. S5.** The UV-Vis spectra of (a)  $\text{Au}_{25}(\text{SC}_2\text{H}_4\text{Ph})_{18}^-$ ; (b)  $\text{Ag}_{44}(\text{SPhF}_2)_{30}^{4+}$ ; (c)  $\text{Ag}_{32}\text{Au}_{12}(\text{SPhF}_2)^{4+}$ ; (d)  $[\text{Ag}_{46}\text{Au}_{24}(\text{S}'\text{Bu})_{32}](\text{BPh}_4)_2$  nanoclusters dissolved in dichloromethane solution.

**Table S1.** Crystal data and structure refinement for [Ag<sub>46</sub>Au<sub>24</sub>(S<sup>t</sup>Bu)<sub>32</sub>](BPh<sub>4</sub>)<sub>2</sub> nanoclusters.

|                                   |                                                   |               |
|-----------------------------------|---------------------------------------------------|---------------|
| Identification code               | 20141126a                                         |               |
| Empirical formula                 | C176 H328 Ag46 Au24 B2 S32                        |               |
| Formula weight                    | 13181.14                                          |               |
| Temperature                       | 150(2) K                                          |               |
| Wavelength                        | 0.71073 Å                                         |               |
| Crystal system                    | Monoclinic                                        |               |
| Space group                       | P2(1)/c                                           |               |
| Unit cell dimensions              | a = 30.009(3) Å                                   | α = 90        |
|                                   | b = 23.247(2) Å                                   | β = 92.630(3) |
|                                   | c = 42.895(3) Å                                   | γ = 90        |
| Volume                            | 29893(5) Å <sup>3</sup>                           |               |
| Z                                 | 4                                                 |               |
| Density (calculated)              | 2.929 Mg/m <sup>3</sup>                           |               |
| Absorption coefficient            | 14.910 mm <sup>-1</sup>                           |               |
| F(000)                            | 23856                                             |               |
| Crystal size                      | 0.24 x 0.22 x 0.20 mm <sup>3</sup>                |               |
| Theta range for data collection   | 0.68 to 26.50°.                                   |               |
| Index ranges                      | -37 ≤ h ≤ 37, 0 ≤ k ≤ 29, 0 ≤ l ≤ 53              |               |
| Reflections collected             | 295735                                            |               |
| Independent reflections           | 61987 [R(int) = 0.0597]                           |               |
| Completeness to theta = 26.50     | 100.0 %                                           |               |
| Absorption correction             | Semi-empirical from equivalents                   |               |
| Max. and min. transmission        | 0.1544 and 0.1242                                 |               |
| Refinement method                 | Full-matrix-block least-squares on F <sup>2</sup> |               |
| Data / restraints / parameters    | 61987 / 0 / 2617                                  |               |
| Goodness-of-fit on F <sup>2</sup> | 1.077                                             |               |
| Final R indices [I > 2σ(I)]       | R1 = 0.0584, wR2 = 0.1434                         |               |
| R indices (all data)              | R1 = 0.0596, wR2 = 0.1437                         |               |
| Largest diff. peak and hole       | 2.068 and -2.585 e. <sup>-3</sup>                 |               |

**Table S2.** Atomic coordinates ( $\times 10^4$ ) and equivalent isotropic displacement parameters ( $\text{\AA}^2 \times 10^3$ ) for  $[\text{Ag}_{46}\text{Au}_{24}(\text{S}^t\text{Bu})_{32}](\text{BPh}_4)_2$ .  $U(\text{eq})$  is defined as one third of the trace of the orthogonalized  $U^{\text{ij}}$  tensor.

|        | x       | y       | z       | U(eq) |
|--------|---------|---------|---------|-------|
| Ag(1)  | 2205(1) | 8117(1) | 1200(1) | 25(1) |
| Ag(2)  | 2152(1) | 5905(1) | 542(1)  | 27(1) |
| Ag(3)  | 2788(1) | 7270(1) | 1302(1) | 24(1) |
| Ag(4)  | 2797(1) | 9488(1) | 1961(1) | 28(1) |
| Ag(5)  | 2448(1) | 8481(1) | 107(1)  | 27(1) |
| Ag(6)  | 1203(1) | 7331(1) | 405(1)  | 28(1) |
| Ag(7)  | 1766(1) | 5776(1) | 1618(1) | 27(1) |
| Ag(8)  | 3188(1) | 9624(1) | 881(1)  | 28(1) |
| Ag(9)  | 4163(1) | 8194(1) | 1058(1) | 28(1) |
| Ag(10) | 853(1)  | 7122(1) | 1457(1) | 26(1) |
| Ag(11) | 2580(1) | 6836(1) | 2387(1) | 28(1) |
| Ag(12) | 3356(1) | 7071(1) | 275(1)  | 28(1) |
| Ag(13) | 3750(1) | 8142(1) | 2104(1) | 29(1) |
| Ag(14) | 1651(1) | 8246(1) | 2251(1) | 28(1) |
| Ag(15) | 3430(1) | 8368(1) | 432(1)  | 27(1) |
| Ag(16) | 1576(1) | 6956(1) | 2072(1) | 28(1) |
| Ag(17) | 1329(1) | 6284(1) | 1017(1) | 27(1) |
| Ag(18) | 2092(1) | 5757(1) | 2272(1) | 30(1) |
| Ag(19) | 2193(1) | 7066(1) | 181(1)  | 27(1) |
| Ag(20) | 2768(1) | 8313(1) | 2323(1) | 28(1) |
| Ag(21) | 2899(1) | 5353(1) | 864(1)  | 29(1) |
| Ag(22) | 2856(1) | 5977(1) | 112(1)  | 29(1) |
| Ag(23) | 2033(1) | 9998(1) | 1620(1) | 30(1) |
| Ag(24) | 2090(1) | 9343(1) | 2416(1) | 29(1) |
| Ag(25) | 2932(1) | 9572(1) | 197(1)  | 29(1) |
| Ag(26) | 3037(1) | 7767(1) | -244(1) | 29(1) |

|        |         |         |         |       |
|--------|---------|---------|---------|-------|
| Ag(27) | 2672(1) | 5324(1) | 1651(1) | 30(1) |
| Ag(28) | 458(1)  | 7075(1) | 835(1)  | 30(1) |
| Ag(29) | 3632(1) | 9123(1) | 1493(1) | 28(1) |
| Ag(30) | 1729(1) | 9237(1) | 276(1)  | 29(1) |
| Ag(31) | 1985(1) | 7528(1) | 2749(1) | 30(1) |
| Ag(32) | 609(1)  | 8298(1) | 1314(1) | 28(1) |
| Ag(33) | 2207(1) | 9991(1) | 843(1)  | 30(1) |
| Ag(34) | 1341(1) | 6145(1) | 189(1)  | 30(1) |
| Ag(35) | 4515(1) | 8361(1) | 1716(1) | 31(1) |
| Ag(36) | 3602(1) | 9300(1) | 2330(1) | 32(1) |
| Ag(37) | 827(1)  | 5964(1) | 1695(1) | 29(1) |
| Ag(38) | 960(1)  | 8630(1) | 662(1)  | 29(1) |
| Ag(39) | 4328(1) | 6961(1) | 1223(1) | 30(1) |
| Ag(40) | 4126(1) | 9358(1) | 821(1)  | 31(1) |
| Ag(41) | 1229(1) | 9148(1) | 1849(1) | 30(1) |
| Ag(42) | 4098(1) | 6942(1) | 1923(1) | 31(1) |
| Ag(43) | 3303(1) | 6310(1) | 1340(1) | 29(1) |
| Ag(44) | 3326(1) | 6082(1) | 2087(1) | 31(1) |
| Ag(45) | 3745(1) | 6182(1) | 708(1)  | 30(1) |
| Ag(46) | 1633(1) | 9013(1) | 1180(1) | 28(1) |
| Au(1)  | 2512(1) | 6490(1) | 1773(1) | 26(1) |
| Au(2)  | 1334(1) | 7712(1) | 1018(1) | 26(1) |
| Au(3)  | 2626(1) | 9235(1) | 1320(1) | 27(1) |
| Au(4)  | 2864(1) | 6583(1) | 742(1)  | 26(1) |
| Au(5)  | 2111(1) | 8773(1) | 1769(1) | 26(1) |
| Au(6)  | 2498(1) | 8877(1) | 714(1)  | 26(1) |
| Au(7)  | 1990(1) | 7012(1) | 792(1)  | 25(1) |
| Au(8)  | 1844(1) | 8115(1) | 547(1)  | 26(1) |
| Au(9)  | 2333(1) | 6128(1) | 1175(1) | 26(1) |
| Au(10) | 1441(1) | 8003(1) | 1635(1) | 26(1) |



|        |         |          |         |       |
|--------|---------|----------|---------|-------|
| Au(11) | 3537(1) | 7353(1)  | 888(1)  | 26(1) |
| Au(12) | 3156(1) | 7277(1)  | 1957(1) | 26(1) |
| Au(13) | 3216(1) | 8429(1)  | 1062(1) | 26(1) |
| Au(14) | 3658(1) | 7697(1)  | 1496(1) | 26(1) |
| Au(15) | 2724(1) | 7729(1)  | 604(1)  | 26(1) |
| Au(16) | 2981(1) | 8378(1)  | 1712(1) | 26(1) |
| Au(17) | 2272(1) | 7622(1)  | 1904(1) | 26(1) |
| Au(18) | 1786(1) | 6959(1)  | 1441(1) | 25(1) |
| Au(19) | 4325(1) | 7560(1)  | 482(1)  | 29(1) |
| Au(20) | 3445(1) | 7284(1)  | 2636(1) | 30(1) |
| Au(21) | 662(1)  | 7759(1)  | 2034(1) | 29(1) |
| Au(22) | 1565(1) | 8072(1)  | -141(1) | 30(1) |
| Au(23) | 3048(1) | 10355(1) | 1490(1) | 30(1) |
| Au(24) | 1853(1) | 5029(1)  | 991(1)  | 30(1) |
| B(1)   | 9700(5) | 7635(7)  | 3629(4) | 40(4) |
| B(2)   | 5269(6) | 7808(7)  | 3879(4) | 39(4) |
| C(1)   | 3744(5) | 10650(6) | 433(3)  | 39(3) |
| C(2)   | 4183(4) | 10800(5) | 585(3)  | 34(3) |
| C(3)   | 3738(4) | 10814(6) | 91(3)   | 39(3) |
| C(4)   | 3447(5) | 10983(6) | 646(3)  | 44(3) |
| C(5)   | 1830(4) | 7128(5)  | -693(3) | 32(3) |
| C(6)   | 2127(4) | 6649(5)  | -801(3) | 32(3) |
| C(7)   | 1744(6) | 7528(6)  | -944(3) | 47(4) |
| C(8)   | 1388(4) | 6849(6)  | -625(3) | 37(3) |
| C(9)   | 564(4)  | 6660(5)  | 2557(3) | 33(3) |
| C(10)  | 681(4)  | 6077(5)  | 2662(3) | 29(3) |
| C(11)  | 705(4)  | 7081(5)  | 2791(3) | 32(3) |
| C(12)  | 63(4)   | 6694(6)  | 2524(3) | 38(3) |
| C(13)  | 3597(4) | 6463(6)  | -461(3) | 37(3) |
| C(14)  | 4017(4) | 6483(7)  | -249(3) | 44(4) |

|       |         |          |         |       |
|-------|---------|----------|---------|-------|
| C(15) | 3518(4) | 5866(6)  | -593(3) | 38(3) |
| C(16) | 3700(5) | 6852(7)  | -730(4) | 51(4) |
| C(17) | 792(4)  | 9106(5)  | -297(3) | 32(3) |
| C(18) | 495(4)  | 8712(5)  | -461(3) | 33(3) |
| C(19) | 1135(4) | 9309(6)  | -534(3) | 37(3) |
| C(20) | 579(5)  | 9649(6)  | -190(3) | 39(3) |
| C(21) | 2546(4) | 3864(5)  | 1161(3) | 32(3) |
| C(22) | 2173(5) | 3610(6)  | 1320(3) | 44(3) |
| C(23) | 2979(4) | 3615(5)  | 1268(3) | 31(3) |
| C(24) | 2452(5) | 3769(7)  | 821(3)  | 46(4) |
| C(25) | -81(4)  | 8889(6)  | 1963(3) | 40(3) |
| C(26) | -412(4) | 8449(6)  | 1891(3) | 38(3) |
| C(27) | -88(4)  | 8961(7)  | 2314(3) | 43(3) |
| C(28) | -201(4) | 9449(6)  | 1820(3) | 38(3) |
| C(29) | 1278(5) | 10609(6) | 2225(3) | 38(3) |
| C(30) | 1526(5) | 11031(6) | 2408(4) | 49(4) |
| C(31) | 951(4)  | 10379(6) | 2454(3) | 45(4) |
| C(32) | 1097(5) | 10923(6) | 1939(3) | 43(3) |
| C(33) | 245(4)  | 6668(6)  | 4(3)    | 34(3) |
| C(34) | 311(5)  | 7251(6)  | -134(3) | 41(3) |
| C(35) | -212(4) | 6654(6)  | 118(3)  | 39(3) |
| C(36) | 301(4)  | 6199(6)  | -226(3) | 38(3) |
| C(37) | 1253(4) | 4654(6)  | 2080(3) | 35(3) |
| C(38) | 1374(4) | 4487(6)  | 2407(3) | 38(3) |
| C(39) | 779(4)  | 4516(5)  | 1997(3) | 37(3) |
| C(40) | 1566(4) | 4400(6)  | 1869(3) | 35(3) |
| C(41) | 2189(4) | 6176(6)  | 3102(3) | 32(3) |
| C(42) | 2699(4) | 6207(6)  | 3107(3) | 40(3) |
| C(43) | 2016(5) | 6554(7)  | 3359(3) | 48(4) |
| C(44) | 1962(5) | 5610(6)  | 3135(3) | 42(3) |

|       |         |          |         |       |
|-------|---------|----------|---------|-------|
| C(45) | 2954(5) | 10356(6) | 2676(3) | 38(3) |
| C(46) | 2850(4) | 10756(6) | 2409(3) | 38(3) |
| C(47) | 2640(5) | 10526(6) | 2921(3) | 45(3) |
| C(48) | 3411(5) | 10453(7) | 2820(4) | 49(4) |
| C(49) | 2403(4) | 11480(5) | 1323(3) | 25(2) |
| C(50) | 1980(4) | 11758(6) | 1201(3) | 38(3) |
| C(51) | 2738(5) | 11767(6) | 1133(3) | 44(4) |
| C(52) | 2487(5) | 11649(7) | 1660(3) | 41(3) |
| C(53) | 767(4)  | 4870(6)  | 766(3)  | 33(3) |
| C(54) | 329(4)  | 5147(6)  | 636(3)  | 40(3) |
| C(55) | 868(4)  | 4363(5)  | 572(3)  | 35(3) |
| C(56) | 706(5)  | 4716(7)  | 1100(3) | 43(3) |
| C(57) | 4682(4) | 8793(5)  | 2525(3) | 29(3) |
| C(58) | 4641(5) | 8187(6)  | 2653(3) | 37(3) |
| C(59) | 4555(5) | 9234(6)  | 2779(3) | 39(3) |
| C(60) | 5132(4) | 8901(6)  | 2432(3) | 31(3) |
| C(61) | 1941(5) | 5012(6)  | -158(3) | 35(3) |
| C(62) | 2038(4) | 4602(6)  | 104(3)  | 39(3) |
| C(63) | 2272(5) | 4880(6)  | -404(3) | 39(3) |
| C(64) | 1472(4) | 4931(5)  | -302(3) | 32(3) |
| C(65) | 4464(4) | 8570(5)  | -66(3)  | 34(3) |
| C(66) | 4268(5) | 8132(6)  | -282(3) | 39(3) |
| C(67) | 4367(5) | 9180(6)  | -161(3) | 39(3) |
| C(68) | 4957(4) | 8471(6)  | -4(3)   | 38(3) |
| C(69) | -218(4) | 6344(6)  | 1398(3) | 38(3) |
| C(70) | -313(5) | 6959(6)  | 1552(3) | 38(3) |
| C(71) | -565(4) | 6278(6)  | 1151(4) | 44(3) |
| C(72) | -295(5) | 5909(5)  | 1634(3) | 35(3) |
| C(73) | 5075(4) | 6485(6)  | 565(3)  | 36(3) |
| C(74) | 5395(5) | 6967(6)  | 629(3)  | 42(3) |

|        |         |         |         |       |
|--------|---------|---------|---------|-------|
| C(75)  | 5190(5) | 5951(6) | 717(3)  | 40(3) |
| C(76)  | 5077(5) | 6448(5) | 223(3)  | 38(3) |
| C(77)  | 3696(4) | 4729(5) | 311(3)  | 32(3) |
| C(78)  | 3756(4) | 4334(6) | 582(3)  | 41(3) |
| C(79)  | 3448(5) | 4401(6) | 72(3)   | 44(3) |
| C(80)  | 4159(4) | 4892(6) | 191(3)  | 37(3) |
| C(81)  | 5192(4) | 9020(6) | 1100(3) | 38(3) |
| C(82)  | 5314(5) | 8475(6) | 957(3)  | 42(3) |
| C(83)  | 5244(5) | 9485(6) | 871(3)  | 44(3) |
| C(84)  | 5503(5) | 9098(6) | 1381(4) | 46(4) |
| C(85)  | 3010(5) | 4578(6) | 2385(3) | 41(3) |
| C(86)  | 3519(5) | 4523(6) | 2410(3) | 46(4) |
| C(87)  | 2888(5) | 4100(6) | 2149(3) | 44(4) |
| C(88)  | 2800(5) | 4465(5) | 2684(3) | 38(3) |
| C(89)  | 1377(5) | 8755(6) | 3029(3) | 36(3) |
| C(90)  | 999(4)  | 8751(5) | 2789(3) | 28(3) |
| C(91)  | 1483(5) | 9323(6) | 3170(3) | 39(3) |
| C(92)  | 1289(4) | 8298(6) | 3262(3) | 35(3) |
| C(93)  | 2858(5) | 9096(6) | -622(3) | 37(3) |
| C(94)  | 2369(4) | 9137(5) | -656(3) | 33(3) |
| C(95)  | 3041(5) | 9660(6) | -662(3) | 42(3) |
| C(96)  | 3025(4) | 8695(7) | -861(3) | 42(3) |
| C(97)  | 4219(4) | 6252(6) | 2760(3) | 35(3) |
| C(98)  | 3906(4) | 5976(6) | 2982(3) | 33(3) |
| C(99)  | 4496(5) | 6690(6) | 2920(3) | 43(3) |
| C(100) | 4468(4) | 5720(6) | 2621(3) | 40(3) |
| C(101) | -312(4) | 8416(6) | 710(3)  | 38(3) |
| C(102) | -700(4) | 8058(6) | 800(4)  | 42(3) |
| C(103) | -404(4) | 9015(6) | 825(3)  | 37(3) |
| C(104) | -358(4) | 8530(7) | 366(3)  | 44(4) |

|        |          |          |         |       |
|--------|----------|----------|---------|-------|
| C(105) | 2015(5)  | 10769(6) | 64(3)   | 42(3) |
| C(106) | 2289(5)  | 11221(6) | 208(4)  | 50(4) |
| C(107) | 1557(5)  | 10893(6) | 159(3)  | 40(3) |
| C(108) | 2041(4)  | 10707(6) | -281(3) | 39(3) |
| C(109) | 5320(4)  | 7034(6)  | 1817(3) | 38(3) |
| C(110) | 5717(5)  | 7193(7)  | 1636(3) | 46(4) |
| C(111) | 5293(4)  | 6385(6)  | 1780(3) | 41(3) |
| C(112) | 5379(4)  | 7107(6)  | 2159(3) | 34(3) |
| C(113) | 4120(5)  | 10567(6) | 1748(3) | 40(3) |
| C(114) | 4155(5)  | 10910(6) | 2056(3) | 44(3) |
| C(115) | 4569(4)  | 10305(6) | 1708(3) | 39(3) |
| C(116) | 4053(5)  | 11011(6) | 1500(3) | 44(3) |
| C(117) | 3165(4)  | 8231(6)  | 3206(3) | 35(3) |
| C(118) | 3610(4)  | 8492(6)  | 3164(3) | 38(3) |
| C(119) | 2841(4)  | 8676(7)  | 3306(3) | 45(4) |
| C(120) | 3273(5)  | 7753(7)  | 3441(3) | 48(4) |
| C(121) | 841(4)   | 10124(6) | 940(3)  | 37(3) |
| C(122) | 601(5)   | 9873(6)  | 1202(3) | 45(3) |
| C(123) | 571(4)   | 10245(6) | 658(4)  | 45(4) |
| C(124) | 1080(4)  | 10655(6) | 1085(3) | 40(3) |
| C(125) | 4159(4)  | 5242(6)  | 1529(3) | 36(3) |
| C(126) | 4395(4)  | 5069(6)  | 1822(3) | 39(3) |
| C(127) | 3733(4)  | 4905(6)  | 1432(3) | 40(3) |
| C(128) | 4485(5)  | 5277(6)  | 1276(3) | 43(3) |
| C(129) | 10081(4) | 7132(6)  | 3590(3) | 33(3) |
| C(130) | 9890(4)  | 6617(5)  | 3486(3) | 34(3) |
| C(131) | 10169(4) | 6123(6)  | 3471(4) | 43(3) |
| C(132) | 10615(4) | 6158(6)  | 3560(3) | 36(3) |
| C(133) | 10801(5) | 6671(6)  | 3673(3) | 42(3) |
| C(134) | 10524(4) | 7159(5)  | 3684(3) | 35(3) |

|        |          |         |         |       |
|--------|----------|---------|---------|-------|
| C(135) | 9375(5)  | 7696(7) | 3334(4) | 47(4) |
| C(136) | 9501(5)  | 7664(6) | 3026(3) | 43(3) |
| C(137) | 9173(4)  | 7691(6) | 2780(3) | 42(3) |
| C(138) | 8712(5)  | 7710(6) | 2804(3) | 42(3) |
| C(139) | 8588(5)  | 7714(6) | 3115(3) | 39(3) |
| C(140) | 8892(5)  | 7660(5) | 3384(3) | 38(3) |
| C(141) | 9456(5)  | 7545(5) | 3969(3) | 36(3) |
| C(142) | 9508(4)  | 7034(6) | 4137(3) | 38(3) |
| C(143) | 9284(5)  | 6945(6) | 4405(3) | 39(3) |
| C(144) | 9002(4)  | 7360(6) | 4511(3) | 34(3) |
| C(145) | 8937(5)  | 7869(6) | 4348(3) | 39(3) |
| C(146) | 9164(5)  | 7960(6) | 4074(3) | 39(3) |
| C(147) | 9986(5)  | 8267(6) | 3666(3) | 40(3) |
| C(148) | 10228(4) | 8428(6) | 3944(3) | 35(3) |
| C(149) | 10471(5) | 8938(6) | 3954(3) | 38(3) |
| C(150) | 10482(4) | 9342(6) | 3723(3) | 38(3) |
| C(151) | 10235(4) | 9217(6) | 3456(3) | 37(3) |
| C(152) | 9994(4)  | 8680(6) | 3435(3) | 40(3) |
| C(153) | 5466(5)  | 7862(6) | 3526(3) | 39(3) |
| C(154) | 5426(4)  | 7446(6) | 3301(3) | 35(3) |
| C(155) | 5650(4)  | 7498(5) | 3020(3) | 30(3) |
| C(156) | 5923(5)  | 7968(6) | 2968(3) | 44(4) |
| C(157) | 5997(5)  | 8369(6) | 3197(3) | 40(3) |
| C(158) | 5760(5)  | 8327(6) | 3458(3) | 38(3) |
| C(159) | 5626(5)  | 7720(6) | 4152(3) | 39(3) |
| C(160) | 6086(5)  | 7726(6) | 4105(3) | 40(3) |
| C(161) | 6378(5)  | 7660(5) | 4361(3) | 35(3) |
| C(162) | 6272(4)  | 7568(6) | 4678(3) | 38(3) |
| C(163) | 5818(4)  | 7586(6) | 4710(3) | 38(3) |
| C(164) | 5515(5)  | 7663(5) | 4469(3) | 36(3) |



|        |         |          |         |       |
|--------|---------|----------|---------|-------|
| C(165) | 4911(5) | 7281(6)  | 3870(3) | 39(3) |
| C(166) | 5074(5) | 6747(6)  | 3925(3) | 38(3) |
| C(167) | 4812(5) | 6244(6)  | 3920(3) | 39(3) |
| C(168) | 4350(5) | 6308(6)  | 3861(3) | 41(3) |
| C(169) | 4159(5) | 6867(6)  | 3795(3) | 41(3) |
| C(170) | 4458(5) | 7311(6)  | 3799(3) | 44(3) |
| C(171) | 4968(5) | 8461(6)  | 3918(3) | 37(3) |
| C(172) | 4706(4) | 8695(6)  | 3674(3) | 39(3) |
| C(173) | 4463(4) | 9215(6)  | 3685(3) | 37(3) |
| C(174) | 4508(5) | 9544(6)  | 3962(3) | 36(3) |
| C(175) | 4784(4) | 9300(6)  | 4215(3) | 40(3) |
| C(176) | 5015(4) | 8796(6)  | 4183(3) | 35(3) |
| S(1)   | 3669(1) | 9889(1)  | 450(1)  | 32(1) |
| S(2)   | 2079(1) | 7463(1)  | -352(1) | 31(1) |
| S(3)   | 789(1)  | 6801(1)  | 2181(1) | 30(1) |
| S(4)   | 3150(1) | 6747(1)  | -258(1) | 31(1) |
| S(5)   | 1058(1) | 8727(1)  | 30(1)   | 32(1) |
| S(6)   | 2513(1) | 4641(1)  | 1208(1) | 30(1) |
| S(7)   | 478(1)  | 8673(1)  | 1851(1) | 32(1) |
| S(8)   | 1586(1) | 9990(1)  | 2091(1) | 32(1) |
| S(9)   | 644(1)  | 6561(1)  | 331(1)  | 32(1) |
| S(10)  | 1329(1) | 5447(1)  | 2057(1) | 31(1) |
| S(11)  | 1981(1) | 6497(1)  | 2725(1) | 32(1) |
| S(12)  | 2918(1) | 9622(1)  | 2547(1) | 32(1) |
| S(13)  | 2391(1) | 10717(1) | 1269(1) | 30(1) |
| S(14)  | 1213(1) | 5385(1)  | 727(1)  | 31(1) |
| S(15)  | 4313(1) | 8926(1)  | 2199(1) | 32(1) |
| S(16)  | 2013(1) | 5773(1)  | -35(1)  | 31(1) |
| S(17)  | 4214(1) | 8503(1)  | 320(1)  | 30(1) |
| S(18)  | 338(1)  | 6323(1)  | 1277(1) | 32(1) |

|       |         |          |         |       |
|-------|---------|----------|---------|-------|
| S(19) | 4513(1) | 6666(1)  | 674(1)  | 32(1) |
| S(20) | 3405(1) | 5359(1)  | 429(1)  | 31(1) |
| S(21) | 4628(1) | 9021(1)  | 1229(1) | 34(1) |
| S(22) | 2830(1) | 5276(1)  | 2222(1) | 33(1) |
| S(23) | 1846(1) | 8548(1)  | 2792(1) | 32(1) |
| S(24) | 3049(1) | 8809(1)  | -238(1) | 31(1) |
| S(25) | 3915(1) | 6605(1)  | 2444(1) | 32(1) |
| S(26) | 244(1)  | 8123(1)  | 797(1)  | 33(1) |
| S(27) | 2213(1) | 10093(1) | 258(1)  | 32(1) |
| S(28) | 4781(1) | 7347(1)  | 1676(1) | 33(1) |
| S(29) | 3693(1) | 10051(1) | 1771(1) | 31(1) |
| S(30) | 2924(1) | 7873(1)  | 2846(1) | 31(1) |
| S(31) | 1274(1) | 9645(1)  | 829(1)  | 32(1) |
| S(32) | 4003(1) | 5993(1)  | 1545(1) | 33(1) |

---

**Table S3.** Bond lengths (Å) and angles (°) for [Ag<sub>46</sub>Au<sub>24</sub>(S<sup>t</sup>Bu)<sub>32</sub>](BPh<sub>4</sub>)<sub>2</sub>.

|              |            |
|--------------|------------|
| Ag(1)-Ag(3)  | 2.6574(12) |
| Ag(1)-Ag(46) | 2.6967(12) |
| Ag(1)-Au(2)  | 2.8511(10) |
| Ag(1)-Au(6)  | 2.9007(10) |
| Ag(1)-Au(5)  | 2.9053(10) |
| Ag(1)-Au(3)  | 2.9277(10) |
| Ag(1)-Au(8)  | 2.9534(10) |
| Ag(1)-Au(10) | 3.0320(9)  |
| Ag(1)-Au(7)  | 3.1570(10) |
| Ag(1)-Au(18) | 3.1637(10) |
| Ag(1)-Au(15) | 3.1822(9)  |
| Ag(1)-Au(16) | 3.1868(10) |

|              |            |
|--------------|------------|
| Ag(2)-S(16)  | 2.508(3)   |
| Ag(2)-Au(4)  | 2.7601(10) |
| Ag(2)-Au(9)  | 2.7928(10) |
| Ag(2)-Au(7)  | 2.8385(10) |
| Ag(2)-Ag(34) | 2.8636(14) |
| Ag(2)-Ag(22) | 2.8732(12) |
| Ag(2)-Ag(21) | 2.8800(13) |
| Ag(2)-Au(24) | 2.9690(10) |
| Ag(2)-Ag(19) | 3.1160(13) |
| Ag(3)-Ag(43) | 2.7162(12) |
| Ag(3)-Au(1)  | 2.8657(10) |
| Ag(3)-Au(14) | 2.8813(10) |
| Ag(3)-Au(4)  | 2.9042(9)  |
| Ag(3)-Au(11) | 2.9349(10) |
| Ag(3)-Au(12) | 2.9714(10) |
| Ag(3)-Au(9)  | 3.0246(10) |
| Ag(3)-Au(16) | 3.1573(10) |
| Ag(3)-Au(15) | 3.1752(10) |
| Ag(3)-Au(18) | 3.1760(10) |
| Ag(3)-Au(13) | 3.1763(10) |
| Ag(4)-S(12)  | 2.542(3)   |
| Ag(4)-Au(5)  | 2.7443(10) |
| Ag(4)-Au(3)  | 2.8360(10) |
| Ag(4)-Au(16) | 2.8567(10) |
| Ag(4)-Ag(36) | 2.8597(13) |
| Ag(4)-Ag(23) | 2.9151(13) |
| Ag(4)-Ag(24) | 2.9643(13) |
| Ag(4)-Au(23) | 2.9754(11) |
| Ag(4)-Ag(20) | 3.1458(13) |
| Ag(5)-S(24)  | 2.505(3)   |

|              |            |
|--------------|------------|
| Ag(5)-Au(6)  | 2.7577(10) |
| Ag(5)-Au(8)  | 2.8080(10) |
| Ag(5)-Au(15) | 2.8505(10) |
| Ag(5)-Ag(26) | 2.8955(13) |
| Ag(5)-Ag(30) | 2.8997(13) |
| Ag(5)-Ag(25) | 2.9405(13) |
| Ag(5)-Au(22) | 2.9659(11) |
| Ag(5)-Ag(15) | 3.2125(13) |
| Ag(6)-S(9)   | 2.465(3)   |
| Ag(6)-Au(8)  | 2.6992(10) |
| Ag(6)-Au(2)  | 2.7867(10) |
| Ag(6)-Au(7)  | 2.9185(10) |
| Ag(6)-Ag(34) | 2.9436(13) |
| Ag(6)-Ag(28) | 3.0223(13) |
| Ag(6)-Au(22) | 3.1397(10) |
| Ag(6)-Ag(19) | 3.2236(13) |
| Ag(6)-Ag(38) | 3.3082(13) |
| Ag(7)-S(10)  | 2.466(3)   |
| Ag(7)-Au(9)  | 2.7342(10) |
| Ag(7)-Au(1)  | 2.8433(10) |
| Ag(7)-Au(18) | 2.8542(10) |
| Ag(7)-Ag(37) | 2.8851(13) |
| Ag(7)-Ag(27) | 2.9129(13) |
| Ag(7)-Ag(18) | 2.9298(13) |
| Ag(7)-Ag(17) | 3.0724(13) |
| Ag(7)-Au(24) | 3.2229(10) |
| Ag(8)-S(1)   | 2.477(3)   |
| Ag(8)-Au(3)  | 2.7372(10) |
| Ag(8)-Au(6)  | 2.7720(10) |
| Ag(8)-Au(13) | 2.8836(10) |

|               |            |
|---------------|------------|
| Ag(8)-Ag(40)  | 2.9053(13) |
| Ag(8)-Ag(25)  | 3.0037(13) |
| Ag(8)-Ag(33)  | 3.0633(13) |
| Ag(8)-Ag(29)  | 3.1125(13) |
| Ag(8)-Au(23)  | 3.1598(10) |
| Ag(9)-S(21)   | 2.466(3)   |
| Ag(9)-Au(14)  | 2.7249(10) |
| Ag(9)-Au(11)  | 2.7856(10) |
| Ag(9)-Ag(40)  | 2.8908(13) |
| Ag(9)-Au(13)  | 2.8946(10) |
| Ag(9)-Au(19)  | 2.9342(10) |
| Ag(9)-Ag(39)  | 2.9876(13) |
| Ag(9)-Ag(35)  | 2.9943(13) |
| Ag(9)-Ag(29)  | 3.3083(13) |
| Ag(10)-S(18)  | 2.515(3)   |
| Ag(10)-Au(2)  | 2.7837(9)  |
| Ag(10)-Au(10) | 2.7878(10) |
| Ag(10)-Au(18) | 2.8278(10) |
| Ag(10)-Ag(28) | 2.8694(13) |
| Ag(10)-Ag(37) | 2.8812(13) |
| Ag(10)-Ag(32) | 2.8897(13) |
| Ag(10)-Au(21) | 2.9628(10) |
| Ag(10)-Ag(17) | 3.1030(12) |
| Ag(10)-Ag(16) | 3.3620(13) |
| Ag(11)-S(11)  | 2.489(3)   |
| Ag(11)-Au(1)  | 2.7490(10) |
| Ag(11)-Au(12) | 2.7801(10) |
| Ag(11)-Au(17) | 2.8817(10) |
| Ag(11)-Ag(31) | 2.9068(13) |
| Ag(11)-Ag(18) | 2.9345(13) |

|               |            |
|---------------|------------|
| Ag(11)-Au(20) | 2.9509(11) |
| Ag(11)-Ag(44) | 3.1631(13) |
| Ag(11)-Ag(16) | 3.2544(13) |
| Ag(12)-S(4)   | 2.459(3)   |
| Ag(12)-Au(11) | 2.7420(10) |
| Ag(12)-Au(4)  | 2.7831(10) |
| Ag(12)-Au(15) | 2.8611(10) |
| Ag(12)-Ag(26) | 2.8779(14) |
| Ag(12)-Ag(45) | 2.9816(14) |
| Ag(12)-Ag(22) | 3.0167(13) |
| Ag(12)-Ag(15) | 3.0953(13) |
| Ag(12)-Au(19) | 3.2111(11) |
| Ag(13)-S(15)  | 2.505(3)   |
| Ag(13)-Au(12) | 2.7394(10) |
| Ag(13)-Au(14) | 2.8070(10) |
| Ag(13)-Au(16) | 2.8471(10) |
| Ag(13)-Ag(36) | 2.9026(13) |
| Ag(13)-Ag(35) | 2.9416(14) |
| Ag(13)-Ag(42) | 3.0911(13) |
| Ag(13)-Ag(20) | 3.1589(13) |
| Ag(13)-Au(20) | 3.1944(11) |
| Ag(14)-S(23)  | 2.472(3)   |
| Ag(14)-Au(10) | 2.7450(10) |
| Ag(14)-Au(5)  | 2.8157(10) |
| Ag(14)-Au(17) | 2.8364(10) |
| Ag(14)-Ag(31) | 2.8578(14) |
| Ag(14)-Ag(24) | 2.9440(13) |
| Ag(14)-Ag(41) | 2.9606(13) |
| Ag(14)-Ag(16) | 3.1005(13) |
| Ag(14)-Au(21) | 3.2714(11) |



|               |            |
|---------------|------------|
| Ag(14)-Ag(20) | 3.3562(13) |
| Ag(15)-S(17)  | 2.443(3)   |
| Ag(15)-Au(15) | 2.7185(10) |
| Ag(15)-Au(13) | 2.8136(10) |
| Ag(15)-Au(11) | 3.0734(10) |
| Ag(15)-Au(19) | 3.2747(10) |
| Ag(15)-Ag(25) | 3.3092(13) |
| Ag(15)-Au(6)  | 3.3183(10) |
| Ag(15)-Ag(26) | 3.3784(13) |
| Ag(16)-S(3)   | 2.455(3)   |
| Ag(16)-Au(17) | 2.7234(10) |
| Ag(16)-Au(18) | 2.8096(10) |
| Ag(16)-Au(10) | 3.0890(10) |
| Ag(16)-Ag(18) | 3.2816(13) |
| Ag(16)-Au(21) | 3.3175(11) |
| Ag(16)-Au(1)  | 3.3224(10) |
| Ag(16)-Ag(31) | 3.3728(13) |
| Ag(17)-S(14)  | 2.449(3)   |
| Ag(17)-Au(18) | 2.7221(10) |
| Ag(17)-Au(7)  | 2.8137(10) |
| Ag(17)-Au(9)  | 3.0802(10) |
| Ag(17)-Ag(28) | 3.2605(13) |
| Ag(17)-Au(24) | 3.3194(10) |
| Ag(17)-Au(2)  | 3.3204(11) |
| Ag(18)-S(22)  | 2.499(3)   |
| Ag(18)-S(10)  | 2.535(3)   |
| Ag(18)-S(11)  | 2.627(3)   |
| Ag(18)-Au(1)  | 3.0516(10) |
| Ag(19)-S(2)   | 2.474(3)   |
| Ag(19)-Au(7)  | 2.7191(10) |

|               |            |
|---------------|------------|
| Ag(19)-Au(15) | 2.8188(10) |
| Ag(19)-Au(8)  | 3.1097(10) |
| Ag(19)-Ag(22) | 3.2411(13) |
| Ag(19)-Au(4)  | 3.2642(10) |
| Ag(19)-Au(22) | 3.2704(10) |
| Ag(19)-Ag(34) | 3.3375(13) |
| Ag(20)-S(30)  | 2.487(3)   |
| Ag(20)-Au(16) | 2.7315(10) |
| Ag(20)-Au(17) | 2.7921(10) |
| Ag(20)-Au(12) | 3.1295(10) |
| Ag(20)-Ag(24) | 3.1780(12) |
| Ag(20)-Au(5)  | 3.2012(10) |
| Ag(20)-Au(20) | 3.3754(10) |
| Ag(21)-S(20)  | 2.459(3)   |
| Ag(21)-S(6)   | 2.532(3)   |
| Ag(21)-Au(9)  | 2.8484(9)  |
| Ag(21)-Au(4)  | 2.9088(10) |
| Ag(21)-Ag(43) | 3.2209(13) |
| Ag(21)-Ag(45) | 3.2820(14) |
| Ag(21)-Au(24) | 3.2958(11) |
| Ag(22)-S(20)  | 2.535(3)   |
| Ag(22)-S(4)   | 2.573(3)   |
| Ag(22)-S(16)  | 2.623(3)   |
| Ag(22)-Au(4)  | 3.0472(10) |
| Ag(23)-S(8)   | 2.476(3)   |
| Ag(23)-S(13)  | 2.521(3)   |
| Ag(23)-Au(3)  | 2.8586(10) |
| Ag(23)-Au(5)  | 2.9268(10) |
| Ag(23)-Ag(46) | 3.1689(14) |
| Ag(23)-Au(23) | 3.2288(11) |

|               |            |
|---------------|------------|
| Ag(23)-Ag(41) | 3.3047(14) |
| Ag(24)-S(8)   | 2.510(3)   |
| Ag(24)-S(23)  | 2.584(3)   |
| Ag(24)-S(12)  | 2.605(3)   |
| Ag(24)-Au(5)  | 3.0757(10) |
| Ag(25)-S(27)  | 2.498(3)   |
| Ag(25)-S(1)   | 2.527(3)   |
| Ag(25)-S(24)  | 2.609(3)   |
| Ag(25)-Au(6)  | 3.0819(10) |
| Ag(26)-S(4)   | 2.399(3)   |
| Ag(26)-S(24)  | 2.422(3)   |
| Ag(27)-S(22)  | 2.476(3)   |
| Ag(27)-S(6)   | 2.505(3)   |
| Ag(27)-Au(1)  | 2.8064(10) |
| Ag(27)-Au(9)  | 2.9159(10) |
| Ag(27)-Ag(44) | 3.1792(13) |
| Ag(27)-Ag(43) | 3.2942(14) |
| Ag(28)-S(26)  | 2.523(3)   |
| Ag(28)-S(9)   | 2.557(3)   |
| Ag(28)-S(18)  | 2.614(3)   |
| Ag(28)-Au(2)  | 3.0862(10) |
| Ag(29)-S(29)  | 2.469(3)   |
| Ag(29)-Au(13) | 2.7107(10) |
| Ag(29)-Au(16) | 2.8056(10) |
| Ag(29)-Au(3)  | 3.0859(11) |
| Ag(29)-Ag(35) | 3.2931(13) |
| Ag(29)-Au(14) | 3.3140(11) |
| Ag(29)-Ag(40) | 3.3435(13) |
| Ag(29)-Au(23) | 3.3585(10) |
| Ag(30)-S(27)  | 2.468(3)   |

|               |            |
|---------------|------------|
| Ag(30)-S(5)   | 2.525(3)   |
| Ag(30)-Au(8)  | 2.8710(10) |
| Ag(30)-S(31)  | 2.950(3)   |
| Ag(30)-Au(6)  | 3.0260(10) |
| Ag(30)-Ag(38) | 3.2277(13) |
| Ag(30)-Au(22) | 3.2682(11) |
| Ag(30)-Ag(33) | 3.2752(13) |
| Ag(31)-S(11)  | 2.397(3)   |
| Ag(31)-S(23)  | 2.417(3)   |
| Ag(31)-S(30)  | 2.942(3)   |
| Ag(32)-S(26)  | 2.463(3)   |
| Ag(32)-S(7)   | 2.508(3)   |
| Ag(32)-Au(10) | 2.8793(10) |
| Ag(32)-Au(2)  | 2.9074(10) |
| Ag(32)-Ag(38) | 3.1304(13) |
| Ag(32)-Au(21) | 3.3275(10) |
| Ag(33)-S(27)  | 2.520(3)   |
| Ag(33)-S(13)  | 2.530(3)   |
| Ag(33)-Au(6)  | 2.7956(10) |
| Ag(33)-S(31)  | 2.911(3)   |
| Ag(33)-Au(3)  | 2.9382(10) |
| Ag(33)-Ag(46) | 3.2337(13) |
| Ag(34)-S(9)   | 2.407(3)   |
| Ag(34)-S(16)  | 2.431(3)   |
| Ag(34)-S(14)  | 2.946(3)   |
| Ag(35)-S(28)  | 2.496(3)   |
| Ag(35)-S(15)  | 2.548(3)   |
| Ag(35)-S(21)  | 2.628(3)   |
| Ag(35)-Au(14) | 3.1071(10) |
| Ag(36)-S(15)  | 2.394(3)   |

|               |            |
|---------------|------------|
| Ag(36)-S(12)  | 2.411(3)   |
| Ag(37)-S(18)  | 2.416(3)   |
| Ag(37)-S(10)  | 2.430(3)   |
| Ag(37)-S(3)   | 2.855(3)   |
| Ag(38)-S(26)  | 2.539(3)   |
| Ag(38)-S(31)  | 2.627(3)   |
| Ag(38)-S(5)   | 2.750(3)   |
| Ag(38)-Au(2)  | 2.8260(10) |
| Ag(38)-Au(8)  | 2.9721(10) |
| Ag(38)-Ag(46) | 3.0635(14) |
| Ag(39)-S(28)  | 2.487(3)   |
| Ag(39)-S(19)  | 2.539(3)   |
| Ag(39)-S(32)  | 2.836(3)   |
| Ag(39)-Au(11) | 2.8652(10) |
| Ag(39)-Au(14) | 2.9255(10) |
| Ag(39)-Ag(42) | 3.1116(13) |
| Ag(39)-Ag(45) | 3.2948(13) |
| Ag(40)-S(21)  | 2.387(3)   |
| Ag(40)-S(1)   | 2.399(3)   |
| Ag(40)-S(17)  | 2.949(3)   |
| Ag(41)-S(8)   | 2.441(3)   |
| Ag(41)-S(7)   | 2.510(3)   |
| Ag(41)-Au(5)  | 2.8209(10) |
| Ag(41)-Au(10) | 2.8955(10) |
| Ag(41)-Ag(46) | 3.1838(13) |
| Ag(42)-S(25)  | 2.456(3)   |
| Ag(42)-S(28)  | 2.530(3)   |
| Ag(42)-S(32)  | 2.743(3)   |
| Ag(42)-Au(14) | 2.8198(10) |
| Ag(42)-Au(12) | 2.9418(10) |

|               |            |
|---------------|------------|
| Ag(42)-Ag(44) | 3.1648(14) |
| Ag(43)-S(32)  | 2.357(3)   |
| Ag(43)-Au(4)  | 2.9012(10) |
| Ag(43)-Au(9)  | 2.9950(11) |
| Ag(43)-Ag(45) | 3.0864(13) |
| Ag(43)-Au(1)  | 3.1092(10) |
| Ag(43)-Au(11) | 3.2026(10) |
| Ag(43)-Ag(44) | 3.2433(13) |
| Ag(44)-S(22)  | 2.478(3)   |
| Ag(44)-S(25)  | 2.589(3)   |
| Ag(44)-Au(12) | 2.8752(10) |
| Ag(44)-Au(1)  | 2.8910(10) |
| Ag(45)-S(20)  | 2.454(3)   |
| Ag(45)-S(19)  | 2.575(3)   |
| Ag(45)-Au(4)  | 2.8124(10) |
| Ag(45)-Au(11) | 2.9044(10) |
| Ag(46)-S(31)  | 2.330(3)   |
| Ag(46)-Au(5)  | 2.9040(10) |
| Ag(46)-Au(3)  | 3.0581(11) |
| Ag(46)-Au(10) | 3.1241(10) |
| Ag(46)-Au(2)  | 3.2194(11) |
| Ag(46)-Au(6)  | 3.3611(10) |
| Au(1)-Au(9)   | 2.7325(7)  |
| Au(1)-Au(12)  | 2.7507(7)  |
| Au(1)-Au(18)  | 2.7745(6)  |
| Au(1)-Au(17)  | 2.7920(7)  |
| Au(2)-Au(10)  | 2.7341(7)  |
| Au(2)-Au(8)   | 2.7545(6)  |
| Au(2)-Au(7)   | 2.7666(6)  |
| Au(2)-Au(18)  | 2.8215(6)  |



|               |           |
|---------------|-----------|
| Au(3)-Au(6)   | 2.7417(7) |
| Au(3)-Au(5)   | 2.7457(7) |
| Au(3)-Au(16)  | 2.7857(7) |
| Au(3)-Au(13)  | 2.8370(6) |
| Au(3)-Au(23)  | 2.9697(7) |
| Au(4)-Au(9)   | 2.7170(7) |
| Au(4)-Au(11)  | 2.7492(7) |
| Au(4)-Au(15)  | 2.7577(7) |
| Au(4)-Au(7)   | 2.8234(7) |
| Au(5)-Au(10)  | 2.7322(7) |
| Au(5)-Au(17)  | 2.7746(7) |
| Au(5)-Au(16)  | 2.7892(7) |
| Au(6)-Au(8)   | 2.7137(7) |
| Au(6)-Au(13)  | 2.7715(7) |
| Au(6)-Au(15)  | 2.7982(7) |
| Au(7)-Au(8)   | 2.7974(7) |
| Au(7)-Au(9)   | 2.7985(6) |
| Au(7)-Au(18)  | 2.8802(6) |
| Au(7)-Au(15)  | 2.9039(7) |
| Au(8)-Au(15)  | 2.7886(7) |
| Au(8)-Au(22)  | 3.0325(7) |
| Au(9)-Au(18)  | 2.8118(6) |
| Au(9)-Au(24)  | 3.0191(7) |
| Au(10)-Au(18) | 2.7810(6) |
| Au(10)-Au(17) | 2.8390(7) |
| Au(10)-Au(21) | 3.0141(7) |
| Au(11)-Au(14) | 2.7380(7) |
| Au(11)-Au(13) | 2.7948(6) |
| Au(11)-Au(15) | 2.8161(7) |
| Au(11)-Au(19) | 3.0368(7) |

|               |           |
|---------------|-----------|
| Au(12)-Au(14) | 2.7204(6) |
| Au(12)-Au(17) | 2.7726(7) |
| Au(12)-Au(16) | 2.8076(7) |
| Au(12)-Au(20) | 2.9998(7) |
| Au(13)-Au(14) | 2.8089(6) |
| Au(13)-Au(15) | 2.9027(7) |
| Au(13)-Au(16) | 2.9083(7) |
| Au(14)-Au(16) | 2.7694(6) |
| Au(16)-Au(17) | 2.9078(7) |
| Au(17)-Au(18) | 2.8603(7) |
| Au(19)-S(19)  | 2.296(3)  |
| Au(19)-S(17)  | 2.319(3)  |
| Au(20)-S(30)  | 2.291(3)  |
| Au(20)-S(25)  | 2.296(3)  |
| Au(21)-S(7)   | 2.324(3)  |
| Au(21)-S(3)   | 2.340(3)  |
| Au(22)-S(5)   | 2.296(3)  |
| Au(22)-S(2)   | 2.310(3)  |
| Au(23)-S(13)  | 2.308(3)  |
| Au(23)-S(29)  | 2.340(3)  |
| Au(24)-S(6)   | 2.332(3)  |
| Au(24)-S(14)  | 2.336(3)  |
| B(1)-C(135)   | 1.570(17) |
| B(1)-C(129)   | 1.648(17) |
| B(1)-C(141)   | 1.677(16) |
| B(1)-C(147)   | 1.706(17) |
| B(2)-C(159)   | 1.563(17) |
| B(2)-C(165)   | 1.629(16) |
| B(2)-C(153)   | 1.659(15) |
| B(2)-C(171)   | 1.778(17) |

|            |           |
|------------|-----------|
| C(1)-C(2)  | 1.484(18) |
| C(1)-C(3)  | 1.516(18) |
| C(1)-C(4)  | 1.52(2)   |
| C(1)-S(1)  | 1.786(13) |
| C(2)-H(2A) | 0.9600    |
| C(2)-H(2B) | 0.9600    |
| C(2)-H(2C) | 0.9600    |
| C(3)-H(3A) | 0.9600    |
| C(3)-H(3B) | 0.9600    |
| C(3)-H(3C) | 0.9600    |
| C(4)-H(4A) | 0.9600    |
| C(4)-H(4B) | 0.9600    |
| C(4)-H(4C) | 0.9600    |
| C(5)-C(7)  | 1.435(16) |
| C(5)-C(6)  | 1.511(17) |
| C(5)-C(8)  | 1.517(17) |
| C(5)-S(2)  | 1.792(13) |
| C(6)-H(6A) | 0.9600    |
| C(6)-H(6B) | 0.9600    |
| C(6)-H(6C) | 0.9600    |
| C(7)-H(7A) | 0.9600    |
| C(7)-H(7B) | 0.9600    |
| C(7)-H(7C) | 0.9600    |
| C(8)-H(8D) | 0.9600    |
| C(8)-H(8E) | 0.9600    |
| C(8)-H(8F) | 0.9600    |
| C(9)-C(11) | 1.450(17) |
| C(9)-C(10) | 1.466(17) |
| C(9)-C(12) | 1.508(18) |
| C(9)-S(3)  | 1.809(12) |

|              |           |
|--------------|-----------|
| C(10)-H(10A) | 0.9600    |
| C(10)-H(10B) | 0.9600    |
| C(10)-H(10C) | 0.9600    |
| C(11)-H(11A) | 0.9600    |
| C(11)-H(11B) | 0.9600    |
| C(11)-H(11C) | 0.9600    |
| C(12)-H(12A) | 0.9600    |
| C(12)-H(12B) | 0.9600    |
| C(12)-H(12C) | 0.9600    |
| C(13)-C(16)  | 1.508(19) |
| C(13)-C(15)  | 1.513(18) |
| C(13)-C(14)  | 1.519(19) |
| C(13)-S(4)   | 1.762(12) |
| C(14)-H(14A) | 0.9600    |
| C(14)-H(14B) | 0.9600    |
| C(14)-H(14C) | 0.9600    |
| C(15)-H(15A) | 0.9600    |
| C(15)-H(15B) | 0.9600    |
| C(15)-H(15C) | 0.9600    |
| C(16)-H(16A) | 0.9600    |
| C(16)-H(16B) | 0.9600    |
| C(16)-H(16C) | 0.9600    |
| C(17)-C(18)  | 1.440(17) |
| C(17)-C(20)  | 1.495(18) |
| C(17)-C(19)  | 1.554(17) |
| C(17)-S(5)   | 1.812(12) |
| C(18)-H(18A) | 0.9600    |
| C(18)-H(18B) | 0.9600    |
| C(18)-H(18C) | 0.9600    |
| C(19)-H(19A) | 0.9600    |

|              |           |
|--------------|-----------|
| C(19)-H(19B) | 0.9600    |
| C(19)-H(19C) | 0.9600    |
| C(20)-H(20A) | 0.9600    |
| C(20)-H(20B) | 0.9600    |
| C(20)-H(20C) | 0.9600    |
| C(21)-C(22)  | 1.461(17) |
| C(21)-C(23)  | 1.478(18) |
| C(21)-C(24)  | 1.486(17) |
| C(21)-S(6)   | 1.821(13) |
| C(22)-H(22A) | 0.9600    |
| C(22)-H(22B) | 0.9600    |
| C(22)-H(22C) | 0.9600    |
| C(23)-H(23A) | 0.9600    |
| C(23)-H(23B) | 0.9600    |
| C(23)-H(23C) | 0.9600    |
| C(24)-H(24A) | 0.9600    |
| C(24)-H(24B) | 0.9600    |
| C(24)-H(24C) | 0.9600    |
| C(25)-C(26)  | 1.451(19) |
| C(25)-C(28)  | 1.48(2)   |
| C(25)-C(27)  | 1.516(19) |
| C(25)-S(7)   | 1.837(12) |
| C(26)-H(26A) | 0.9600    |
| C(26)-H(26B) | 0.9600    |
| C(26)-H(26C) | 0.9600    |
| C(27)-H(27A) | 0.9600    |
| C(27)-H(27B) | 0.9600    |
| C(27)-H(27C) | 0.9600    |
| C(28)-H(28A) | 0.9600    |
| C(28)-H(28B) | 0.9600    |

|              |           |
|--------------|-----------|
| C(28)-H(28C) | 0.9600    |
| C(29)-C(30)  | 1.44(2)   |
| C(29)-C(32)  | 1.506(18) |
| C(29)-C(31)  | 1.518(19) |
| C(29)-S(8)   | 1.819(12) |
| C(30)-H(30A) | 0.9600    |
| C(30)-H(30B) | 0.9600    |
| C(30)-H(30C) | 0.9600    |
| C(31)-H(31A) | 0.9600    |
| C(31)-H(31B) | 0.9600    |
| C(31)-H(31C) | 0.9600    |
| C(32)-H(32A) | 0.9600    |
| C(32)-H(32B) | 0.9600    |
| C(32)-H(32C) | 0.9600    |
| C(33)-C(35)  | 1.477(17) |
| C(33)-C(36)  | 1.485(17) |
| C(33)-C(34)  | 1.493(18) |
| C(33)-S(9)   | 1.819(12) |
| C(34)-H(34A) | 0.9600    |
| C(34)-H(34B) | 0.9600    |
| C(34)-H(34C) | 0.9600    |
| C(35)-H(35A) | 0.9600    |
| C(35)-H(35B) | 0.9600    |
| C(35)-H(35C) | 0.9600    |
| C(36)-H(36A) | 0.9600    |
| C(36)-H(36B) | 0.9600    |
| C(36)-H(36C) | 0.9600    |
| C(37)-C(40)  | 1.457(18) |
| C(37)-C(38)  | 1.485(17) |
| C(37)-C(39)  | 1.486(17) |

|              |           |
|--------------|-----------|
| C(37)-S(10)  | 1.860(13) |
| C(38)-H(38A) | 0.9600    |
| C(38)-H(38B) | 0.9600    |
| C(38)-H(38C) | 0.9600    |
| C(39)-H(39A) | 0.9600    |
| C(39)-H(39B) | 0.9600    |
| C(39)-H(39C) | 0.9600    |
| C(40)-H(40A) | 0.9600    |
| C(40)-H(40B) | 0.9600    |
| C(40)-H(40C) | 0.9600    |
| C(41)-C(44)  | 1.491(17) |
| C(41)-C(43)  | 1.520(17) |
| C(41)-C(42)  | 1.532(17) |
| C(41)-S(11)  | 1.865(13) |
| C(42)-H(42A) | 0.9600    |
| C(42)-H(42B) | 0.9600    |
| C(42)-H(42C) | 0.9600    |
| C(43)-H(43A) | 0.9600    |
| C(43)-H(43B) | 0.9600    |
| C(43)-H(43C) | 0.9600    |
| C(44)-H(44A) | 0.9600    |
| C(44)-H(44B) | 0.9600    |
| C(44)-H(44C) | 0.9600    |
| C(45)-C(47)  | 1.496(19) |
| C(45)-C(46)  | 1.497(19) |
| C(45)-C(48)  | 1.497(18) |
| C(45)-S(12)  | 1.797(13) |
| C(46)-H(46A) | 0.9600    |
| C(46)-H(46B) | 0.9600    |
| C(46)-H(46C) | 0.9600    |

|              |           |
|--------------|-----------|
| C(47)-H(47A) | 0.9600    |
| C(47)-H(47B) | 0.9600    |
| C(47)-H(47C) | 0.9600    |
| C(48)-H(48A) | 0.9600    |
| C(48)-H(48B) | 0.9600    |
| C(48)-H(48C) | 0.9600    |
| C(49)-C(51)  | 1.482(16) |
| C(49)-C(50)  | 1.498(16) |
| C(49)-C(52)  | 1.507(16) |
| C(49)-S(13)  | 1.790(12) |
| C(50)-H(50A) | 0.9600    |
| C(50)-H(50B) | 0.9600    |
| C(50)-H(50C) | 0.9600    |
| C(51)-H(51A) | 0.9600    |
| C(51)-H(51B) | 0.9600    |
| C(51)-H(51C) | 0.9600    |
| C(52)-H(52A) | 0.9600    |
| C(52)-H(52B) | 0.9600    |
| C(52)-H(52C) | 0.9600    |
| C(53)-C(55)  | 1.483(17) |
| C(53)-C(56)  | 1.496(17) |
| C(53)-C(54)  | 1.546(18) |
| C(53)-S(14)  | 1.809(12) |
| C(54)-H(54A) | 0.9600    |
| C(54)-H(54B) | 0.9600    |
| C(54)-H(54C) | 0.9600    |
| C(55)-H(55A) | 0.9600    |
| C(55)-H(55B) | 0.9600    |
| C(55)-H(55C) | 0.9600    |
| C(56)-H(56A) | 0.9600    |



|              |           |
|--------------|-----------|
| C(56)-H(56B) | 0.9600    |
| C(56)-H(56C) | 0.9600    |
| C(57)-C(60)  | 1.446(16) |
| C(57)-C(58)  | 1.519(17) |
| C(57)-C(59)  | 1.555(17) |
| C(57)-S(15)  | 1.774(12) |
| C(58)-H(58A) | 0.9600    |
| C(58)-H(58B) | 0.9600    |
| C(58)-H(58C) | 0.9600    |
| C(59)-H(59A) | 0.9600    |
| C(59)-H(59B) | 0.9600    |
| C(59)-H(59C) | 0.9600    |
| C(60)-H(60A) | 0.9600    |
| C(60)-H(60B) | 0.9600    |
| C(60)-H(60C) | 0.9600    |
| C(61)-C(62)  | 1.494(18) |
| C(61)-C(63)  | 1.513(17) |
| C(61)-C(64)  | 1.521(18) |
| C(61)-S(16)  | 1.855(13) |
| C(62)-H(62A) | 0.9600    |
| C(62)-H(62B) | 0.9600    |
| C(62)-H(62C) | 0.9600    |
| C(63)-H(63A) | 0.9600    |
| C(63)-H(63B) | 0.9600    |
| C(63)-H(63C) | 0.9600    |
| C(64)-H(64A) | 0.9600    |
| C(64)-H(64B) | 0.9600    |
| C(64)-H(64C) | 0.9600    |
| C(65)-C(66)  | 1.481(18) |
| C(65)-C(67)  | 1.499(17) |

|              |           |
|--------------|-----------|
| C(65)-C(68)  | 1.508(18) |
| C(65)-S(17)  | 1.856(12) |
| C(66)-H(66A) | 0.9600    |
| C(66)-H(66B) | 0.9600    |
| C(66)-H(66C) | 0.9600    |
| C(67)-H(67A) | 0.9600    |
| C(67)-H(67B) | 0.9600    |
| C(67)-H(67C) | 0.9600    |
| C(68)-H(68A) | 0.9600    |
| C(68)-H(68B) | 0.9600    |
| C(68)-H(68C) | 0.9600    |
| C(69)-C(72)  | 1.457(18) |
| C(69)-C(71)  | 1.459(18) |
| C(69)-C(70)  | 1.607(19) |
| C(69)-S(18)  | 1.769(13) |
| C(70)-H(70A) | 0.9600    |
| C(70)-H(70B) | 0.9600    |
| C(70)-H(70C) | 0.9600    |
| C(71)-H(71A) | 0.9600    |
| C(71)-H(71B) | 0.9600    |
| C(71)-H(71C) | 0.9600    |
| C(72)-H(72A) | 0.9600    |
| C(72)-H(72B) | 0.9600    |
| C(72)-H(72C) | 0.9600    |
| C(73)-C(75)  | 1.439(17) |
| C(73)-C(76)  | 1.472(18) |
| C(73)-C(74)  | 1.492(19) |
| C(73)-S(19)  | 1.818(12) |
| C(74)-H(74A) | 0.9600    |
| C(74)-H(74B) | 0.9600    |

|              |           |
|--------------|-----------|
| C(74)-H(74C) | 0.9600    |
| C(75)-H(75A) | 0.9600    |
| C(75)-H(75B) | 0.9600    |
| C(75)-H(75C) | 0.9600    |
| C(76)-H(76A) | 0.9600    |
| C(76)-H(76B) | 0.9600    |
| C(76)-H(76C) | 0.9600    |
| C(77)-C(79)  | 1.456(18) |
| C(77)-C(78)  | 1.484(17) |
| C(77)-C(80)  | 1.551(17) |
| C(77)-S(20)  | 1.792(12) |
| C(78)-H(78A) | 0.9600    |
| C(78)-H(78B) | 0.9600    |
| C(78)-H(78C) | 0.9600    |
| C(79)-H(79A) | 0.9600    |
| C(79)-H(79B) | 0.9600    |
| C(79)-H(79C) | 0.9600    |
| C(80)-H(80A) | 0.9600    |
| C(80)-H(80B) | 0.9600    |
| C(80)-H(80C) | 0.9600    |
| C(81)-C(82)  | 1.461(19) |
| C(81)-C(83)  | 1.473(19) |
| C(81)-C(84)  | 1.501(18) |
| C(81)-S(21)  | 1.804(14) |
| C(82)-H(82A) | 0.9600    |
| C(82)-H(82B) | 0.9600    |
| C(82)-H(82C) | 0.9600    |
| C(83)-H(83A) | 0.9600    |
| C(83)-H(83B) | 0.9600    |
| C(83)-H(83C) | 0.9600    |

|              |           |
|--------------|-----------|
| C(84)-H(84A) | 0.9600    |
| C(84)-H(84B) | 0.9600    |
| C(84)-H(84C) | 0.9600    |
| C(85)-C(88)  | 1.479(19) |
| C(85)-C(86)  | 1.53(2)   |
| C(85)-C(87)  | 1.535(19) |
| C(85)-S(22)  | 1.838(13) |
| C(86)-H(86A) | 0.9600    |
| C(86)-H(86B) | 0.9600    |
| C(86)-H(86C) | 0.9600    |
| C(87)-H(87A) | 0.9600    |
| C(87)-H(87B) | 0.9600    |
| C(87)-H(87C) | 0.9600    |
| C(88)-H(88A) | 0.9600    |
| C(88)-H(88B) | 0.9600    |
| C(88)-H(88C) | 0.9600    |
| C(89)-C(91)  | 1.480(18) |
| C(89)-C(92)  | 1.490(18) |
| C(89)-C(90)  | 1.498(18) |
| C(89)-S(23)  | 1.835(12) |
| C(90)-H(90A) | 0.9600    |
| C(90)-H(90B) | 0.9600    |
| C(90)-H(90C) | 0.9600    |
| C(91)-H(91A) | 0.9600    |
| C(91)-H(91B) | 0.9600    |
| C(91)-H(91C) | 0.9600    |
| C(92)-H(92A) | 0.9600    |
| C(92)-H(92B) | 0.9600    |
| C(92)-H(92C) | 0.9600    |
| C(93)-C(95)  | 1.436(18) |

|               |           |
|---------------|-----------|
| C(93)-C(94)   | 1.471(18) |
| C(93)-C(96)   | 1.487(19) |
| C(93)-S(24)   | 1.846(13) |
| C(94)-H(94A)  | 0.9600    |
| C(94)-H(94B)  | 0.9600    |
| C(94)-H(94C)  | 0.9600    |
| C(95)-H(95A)  | 0.9600    |
| C(95)-H(95B)  | 0.9600    |
| C(95)-H(95C)  | 0.9600    |
| C(96)-H(96A)  | 0.9600    |
| C(96)-H(96B)  | 0.9600    |
| C(96)-H(96C)  | 0.9600    |
| C(97)-C(99)   | 1.466(19) |
| C(97)-C(98)   | 1.512(18) |
| C(97)-C(100)  | 1.577(18) |
| C(97)-S(25)   | 1.796(12) |
| C(98)-H(98A)  | 0.9600    |
| C(98)-H(98B)  | 0.9600    |
| C(98)-H(98C)  | 0.9600    |
| C(99)-H(99A)  | 0.9600    |
| C(99)-H(99B)  | 0.9600    |
| C(99)-H(99C)  | 0.9600    |
| C(100)-H(10D) | 0.9600    |
| C(100)-H(10E) | 0.9600    |
| C(100)-H(10F) | 0.9600    |
| C(101)-C(102) | 1.497(19) |
| C(101)-C(104) | 1.498(18) |
| C(101)-C(103) | 1.506(19) |
| C(101)-S(26)  | 1.825(13) |
| C(102)-H(10G) | 0.9600    |

|                |           |
|----------------|-----------|
| C(102)-H(10H)  | 0.9600    |
| C(102)-H(10I)  | 0.9600    |
| C(103)-H(10J)  | 0.9600    |
| C(103)-H(10K)  | 0.9600    |
| C(103)-H(10L)  | 0.9600    |
| C(104)-H(10M)  | 0.9600    |
| C(104)-H(10N)  | 0.9600    |
| C(104)-H(10O)  | 0.9600    |
| C(105)-C(106)  | 1.45(2)   |
| C(105)-C(107)  | 1.480(19) |
| C(105)-C(108)  | 1.492(19) |
| C(105)-S(27)   | 1.862(13) |
| C(106)-H(10P)  | 0.9600    |
| C(106)-H(10Q)  | 0.9600    |
| C(106)-H(10R)  | 0.9600    |
| C(107)-H(10S)  | 0.9600    |
| C(107)-H(10T)  | 0.9600    |
| C(107)-H(10U)  | 0.9600    |
| C(108)-H(10V)  | 0.9600    |
| C(108)-H(10W)  | 0.9600    |
| C(108)-H(10\$) | 0.9600    |
| C(109)-C(112)  | 1.479(17) |
| C(109)-C(110)  | 1.498(19) |
| C(109)-C(111)  | 1.517(19) |
| C(109)-S(28)   | 1.852(13) |
| C(110)-H(11D)  | 0.9600    |
| C(110)-H(11E)  | 0.9600    |
| C(110)-H(11F)  | 0.9600    |
| C(111)-H(11G)  | 0.9600    |
| C(111)-H(11H)  | 0.9600    |

|                |           |
|----------------|-----------|
| C(111)-H(11I)  | 0.9600    |
| C(112)-H(11J)  | 0.9600    |
| C(112)-H(11K)  | 0.9600    |
| C(112)-H(11L)  | 0.9600    |
| C(113)-C(116)  | 1.489(19) |
| C(113)-C(115)  | 1.493(19) |
| C(113)-C(114)  | 1.545(18) |
| C(113)-S(29)   | 1.763(14) |
| C(114)-H(11M)  | 0.9600    |
| C(114)-H(11N)  | 0.9600    |
| C(114)-H(11O)  | 0.9600    |
| C(115)-H(11P)  | 0.9600    |
| C(115)-H(11Q)  | 0.9600    |
| C(115)-H(11R)  | 0.9600    |
| C(116)-H(11S)  | 0.9600    |
| C(116)-H(11T)  | 0.9600    |
| C(116)-H(11U)  | 0.9600    |
| C(117)-C(118)  | 1.485(18) |
| C(117)-C(119)  | 1.496(18) |
| C(117)-C(120)  | 1.526(19) |
| C(117)-S(30)   | 1.871(12) |
| C(118)-H(11V)  | 0.9600    |
| C(118)-H(11W)  | 0.9600    |
| C(118)-H(11I)  | 0.9600    |
| C(119)-H(11\$) | 0.9600    |
| C(119)-H(112)  | 0.9600    |
| C(119)-H(113)  | 0.9600    |
| C(120)-H(12D)  | 0.9600    |
| C(120)-H(12E)  | 0.9600    |
| C(120)-H(12F)  | 0.9600    |

|                |           |
|----------------|-----------|
| C(121)-C(123)  | 1.451(17) |
| C(121)-C(122)  | 1.49(2)   |
| C(121)-C(124)  | 1.542(19) |
| C(121)-S(31)   | 1.791(13) |
| C(122)-H(12G)  | 0.9600    |
| C(122)-H(12H)  | 0.9600    |
| C(122)-H(12I)  | 0.9600    |
| C(123)-H(12J)  | 0.9600    |
| C(123)-H(12K)  | 0.9600    |
| C(123)-H(12L)  | 0.9600    |
| C(124)-H(12M)  | 0.9600    |
| C(124)-H(12N)  | 0.9600    |
| C(124)-H(12O)  | 0.9600    |
| C(125)-C(126)  | 1.471(17) |
| C(125)-C(128)  | 1.496(18) |
| C(125)-C(127)  | 1.540(19) |
| C(125)-S(32)   | 1.810(13) |
| C(126)-H(12P)  | 0.9600    |
| C(126)-H(12Q)  | 0.9600    |
| C(126)-H(12R)  | 0.9600    |
| C(127)-H(12S)  | 0.9600    |
| C(127)-H(12T)  | 0.9600    |
| C(127)-H(12U)  | 0.9600    |
| C(128)-H(12V)  | 0.9600    |
| C(128)-H(12W)  | 0.9600    |
| C(128)-H(12\$) | 0.9600    |
| C(129)-C(134)  | 1.375(17) |
| C(129)-C(130)  | 1.391(18) |
| C(130)-C(131)  | 1.423(19) |
| C(130)-H(130)  | 0.9300    |



|               |           |
|---------------|-----------|
| C(131)-C(132) | 1.378(19) |
| C(131)-H(131) | 0.9300    |
| C(132)-C(133) | 1.395(19) |
| C(132)-H(132) | 0.9300    |
| C(133)-C(134) | 1.408(18) |
| C(133)-H(133) | 0.9300    |
| C(134)-H(134) | 0.9300    |
| C(135)-C(136) | 1.39(2)   |
| C(135)-C(140) | 1.478(19) |
| C(136)-C(137) | 1.409(19) |
| C(136)-H(136) | 0.9300    |
| C(137)-C(138) | 1.392(18) |
| C(137)-H(137) | 0.9300    |
| C(138)-C(139) | 1.402(18) |
| C(138)-H(138) | 0.9300    |
| C(139)-C(140) | 1.443(19) |
| C(139)-H(139) | 0.9300    |
| C(140)-H(140) | 0.9300    |
| C(141)-C(146) | 1.390(18) |
| C(141)-C(142) | 1.392(18) |
| C(142)-C(143) | 1.375(18) |
| C(142)-H(142) | 0.9300    |
| C(143)-C(144) | 1.375(18) |
| C(143)-H(143) | 0.9300    |
| C(144)-C(145) | 1.385(19) |
| C(144)-H(144) | 0.9300    |
| C(145)-C(146) | 1.406(18) |
| C(145)-H(145) | 0.9300    |
| C(146)-H(146) | 0.9300    |
| C(147)-C(152) | 1.380(18) |

|               |           |
|---------------|-----------|
| C(147)-C(148) | 1.42(2)   |
| C(148)-C(149) | 1.392(18) |
| C(148)-H(148) | 0.9300    |
| C(149)-C(150) | 1.366(19) |
| C(149)-H(149) | 0.9300    |
| C(150)-C(151) | 1.366(19) |
| C(150)-H(150) | 0.9300    |
| C(151)-C(152) | 1.443(19) |
| C(151)-H(151) | 0.9300    |
| C(152)-H(152) | 0.9300    |
| C(153)-C(154) | 1.367(18) |
| C(153)-C(158) | 1.432(18) |
| C(154)-C(155) | 1.412(17) |
| C(154)-H(154) | 0.9300    |
| C(155)-C(156) | 1.389(18) |
| C(155)-H(155) | 0.9300    |
| C(156)-C(157) | 1.363(18) |
| C(156)-H(156) | 0.9300    |
| C(157)-C(158) | 1.360(18) |
| C(157)-H(157) | 0.9300    |
| C(158)-H(158) | 0.9300    |
| C(159)-C(160) | 1.407(19) |
| C(159)-C(164) | 1.421(18) |
| C(160)-C(161) | 1.380(19) |
| C(160)-H(160) | 0.9300    |
| C(161)-C(162) | 1.429(17) |
| C(161)-H(161) | 0.9300    |
| C(162)-C(163) | 1.374(18) |
| C(162)-H(162) | 0.9300    |
| C(163)-C(164) | 1.358(19) |

|                    |           |
|--------------------|-----------|
| C(163)-H(163)      | 0.9300    |
| C(164)-H(164)      | 0.9300    |
| C(165)-C(166)      | 1.351(19) |
| C(165)-C(170)      | 1.379(19) |
| C(166)-C(167)      | 1.409(19) |
| C(166)-H(166)      | 0.9300    |
| C(167)-C(168)      | 1.408(19) |
| C(167)-H(167)      | 0.9300    |
| C(168)-C(169)      | 1.44(2)   |
| C(168)-H(168)      | 0.9300    |
| C(169)-C(170)      | 1.367(19) |
| C(169)-H(169)      | 0.9300    |
| C(170)-H(170)      | 0.9300    |
| C(171)-C(176)      | 1.383(18) |
| C(171)-C(172)      | 1.390(19) |
| C(172)-C(173)      | 1.414(19) |
| C(172)-H(172)      | 0.9300    |
| C(173)-C(174)      | 1.417(18) |
| C(173)-H(173)      | 0.9300    |
| C(174)-C(175)      | 1.453(19) |
| C(174)-H(174)      | 0.9300    |
| C(175)-C(176)      | 1.372(19) |
| C(175)-H(175)      | 0.9300    |
| C(176)-H(176)      | 0.9300    |
| <br>               |           |
| Au(2)-Ag(1)-Au(3)  | 136.42(3) |
| Au(6)-Ag(1)-Au(3)  | 56.12(2)  |
| Au(5)-Ag(1)-Au(3)  | 56.16(2)  |
| Ag(3)-Ag(1)-Au(8)  | 111.46(3) |
| Ag(46)-Ag(1)-Au(8) | 76.45(3)  |

|                     |            |
|---------------------|------------|
| Au(2)-Ag(1)-Au(8)   | 56.63(2)   |
| Au(6)-Ag(1)-Au(8)   | 55.23(2)   |
| Au(5)-Ag(1)-Au(8)   | 138.77(3)  |
| Au(3)-Ag(1)-Au(8)   | 107.74(3)  |
| Ag(3)-Ag(1)-Au(10)  | 110.14(4)  |
| Ag(46)-Ag(1)-Au(10) | 65.79(3)   |
| Au(2)-Ag(1)-Au(10)  | 55.28(2)   |
| Au(6)-Ag(1)-Au(10)  | 139.30(3)  |
| Au(5)-Ag(1)-Au(10)  | 54.746(19) |
| Au(3)-Ag(1)-Au(10)  | 107.56(3)  |
| Au(8)-Ag(1)-Au(10)  | 109.21(3)  |
| Ag(3)-Ag(1)-Au(7)   | 66.75(3)   |
| Ag(46)-Ag(1)-Au(7)  | 119.83(4)  |
| Au(2)-Ag(1)-Au(7)   | 54.55(2)   |
| Au(6)-Ag(1)-Au(7)   | 99.09(3)   |
| Au(5)-Ag(1)-Au(7)   | 150.26(3)  |
| Au(3)-Ag(1)-Au(7)   | 153.58(3)  |
| Au(8)-Ag(1)-Au(7)   | 54.367(19) |
| Au(10)-Ag(1)-Au(7)  | 97.48(3)   |
| Ag(3)-Ag(1)-Au(18)  | 65.46(3)   |
| Ag(46)-Ag(1)-Au(18) | 113.96(4)  |
| Au(2)-Ag(1)-Au(18)  | 55.66(2)   |
| Au(6)-Ag(1)-Au(18)  | 153.03(3)  |
| Au(5)-Ag(1)-Au(18)  | 96.71(3)   |
| Au(3)-Ag(1)-Au(18)  | 150.82(3)  |
| Au(8)-Ag(1)-Au(18)  | 100.06(3)  |
| Au(10)-Ag(1)-Au(18) | 53.289(18) |
| Au(7)-Ag(1)-Au(18)  | 54.215(19) |
| Ag(3)-Ag(1)-Au(15)  | 65.16(3)   |
| Ag(46)-Ag(1)-Au(15) | 121.79(4)  |

|                     |            |
|---------------------|------------|
| Au(2)-Ag(1)-Au(15)  | 99.45(3)   |
| Au(6)-Ag(1)-Au(15)  | 54.54(2)   |
| Au(5)-Ag(1)-Au(15)  | 153.32(3)  |
| Au(3)-Ag(1)-Au(15)  | 99.73(3)   |
| Au(8)-Ag(1)-Au(15)  | 53.909(19) |
| Au(10)-Ag(1)-Au(15) | 151.77(3)  |
| Au(7)-Ag(1)-Au(15)  | 54.526(18) |
| Au(18)-Ag(1)-Au(15) | 103.76(3)  |
| Ag(3)-Ag(1)-Au(16)  | 64.66(3)   |
| Ag(46)-Ag(1)-Au(16) | 108.56(4)  |
| Au(2)-Ag(1)-Au(16)  | 151.98(3)  |
| Au(6)-Ag(1)-Au(16)  | 98.23(3)   |
| Au(5)-Ag(1)-Au(16)  | 54.26(2)   |
| Au(3)-Ag(1)-Au(16)  | 54.00(2)   |
| Au(8)-Ag(1)-Au(16)  | 151.39(3)  |
| Au(10)-Ag(1)-Au(16) | 98.11(3)   |
| Au(7)-Ag(1)-Au(16)  | 131.40(3)  |
| Au(18)-Ag(1)-Au(16) | 103.06(3)  |
| Au(15)-Ag(1)-Au(16) | 103.77(3)  |
| S(16)-Ag(2)-Au(4)   | 117.92(7)  |
| S(16)-Ag(2)-Au(9)   | 175.97(7)  |
| Au(4)-Ag(2)-Au(9)   | 58.58(2)   |
| S(16)-Ag(2)-Au(7)   | 117.36(7)  |
| Au(4)-Ag(2)-Au(7)   | 60.55(2)   |
| Au(9)-Ag(2)-Au(7)   | 59.59(2)   |
| S(16)-Ag(2)-Ag(34)  | 53.33(7)   |
| Au(4)-Ag(2)-Ag(34)  | 132.90(4)  |
| Au(9)-Ag(2)-Ag(34)  | 126.93(4)  |
| Au(7)-Ag(2)-Ag(34)  | 82.34(3)   |
| S(16)-Ag(2)-Ag(22)  | 57.88(7)   |

|                     |           |
|---------------------|-----------|
| Au(4)-Ag(2)-Ag(22)  | 65.46(3)  |
| Au(9)-Ag(2)-Ag(22)  | 119.85(4) |
| Au(7)-Ag(2)-Ag(22)  | 109.46(4) |
| Ag(34)-Ag(2)-Ag(22) | 106.35(4) |
| S(16)-Ag(2)-Ag(21)  | 120.64(7) |
| Au(4)-Ag(2)-Ag(21)  | 62.05(3)  |
| Au(9)-Ag(2)-Ag(21)  | 60.26(3)  |
| Au(7)-Ag(2)-Ag(21)  | 111.47(4) |
| Ag(34)-Ag(2)-Ag(21) | 164.76(4) |
| Ag(22)-Ag(2)-Ag(21) | 75.85(3)  |
| S(16)-Ag(2)-Au(24)  | 120.91(7) |
| Au(4)-Ag(2)-Au(24)  | 116.28(3) |
| Au(9)-Ag(2)-Au(24)  | 63.11(2)  |
| Au(7)-Ag(2)-Au(24)  | 108.35(3) |
| Ag(34)-Ag(2)-Au(24) | 101.63(3) |
| Ag(22)-Ag(2)-Au(24) | 135.20(4) |
| Ag(21)-Ag(2)-Au(24) | 68.58(3)  |
| S(16)-Ag(2)-Ag(19)  | 67.97(7)  |
| Au(4)-Ag(2)-Ag(19)  | 67.17(3)  |
| Au(9)-Ag(2)-Ag(19)  | 108.17(3) |
| Au(7)-Ag(2)-Ag(19)  | 54.10(2)  |
| Ag(34)-Ag(2)-Ag(19) | 67.70(3)  |
| Ag(22)-Ag(2)-Ag(19) | 65.38(3)  |
| Ag(21)-Ag(2)-Ag(19) | 125.22(4) |
| Au(24)-Ag(2)-Ag(19) | 159.38(4) |
| Ag(1)-Ag(3)-Ag(43)  | 170.95(5) |
| Ag(1)-Ag(3)-Au(1)   | 112.09(4) |
| Ag(43)-Ag(3)-Au(1)  | 67.64(3)  |
| Ag(1)-Ag(3)-Au(14)  | 111.98(4) |
| Ag(43)-Ag(3)-Au(14) | 76.10(3)  |

|                     |            |
|---------------------|------------|
| Au(1)-Ag(3)-Au(14)  | 107.53(3)  |
| Ag(1)-Ag(3)-Au(4)   | 110.30(4)  |
| Ag(43)-Ag(3)-Au(4)  | 62.05(3)   |
| Au(1)-Ag(3)-Au(4)   | 105.78(3)  |
| Au(14)-Ag(3)-Au(4)  | 108.91(3)  |
| Ag(1)-Ag(3)-Au(11)  | 111.63(4)  |
| Ag(43)-Ag(3)-Au(11) | 68.92(3)   |
| Au(1)-Ag(3)-Au(11)  | 136.24(3)  |
| Au(14)-Ag(3)-Au(11) | 56.16(2)   |
| Au(4)-Ag(3)-Au(11)  | 56.17(2)   |
| Ag(1)-Ag(3)-Au(12)  | 111.46(3)  |
| Ag(43)-Ag(3)-Au(12) | 76.22(3)   |
| Au(1)-Ag(3)-Au(12)  | 56.19(2)   |
| Au(14)-Ag(3)-Au(12) | 55.37(2)   |
| Au(4)-Ag(3)-Au(12)  | 138.22(3)  |
| Au(11)-Ag(3)-Au(12) | 108.05(3)  |
| Ag(1)-Ag(3)-Au(9)   | 109.39(4)  |
| Ag(43)-Ag(3)-Au(9)  | 62.62(3)   |
| Au(1)-Ag(3)-Au(9)   | 55.20(2)   |
| Au(14)-Ag(3)-Au(9)  | 138.63(3)  |
| Au(4)-Ag(3)-Au(9)   | 54.50(2)   |
| Au(11)-Ag(3)-Au(9)  | 107.46(3)  |
| Au(12)-Ag(3)-Au(9)  | 108.73(3)  |
| Ag(1)-Ag(3)-Au(16)  | 65.82(3)   |
| Ag(43)-Ag(3)-Au(16) | 123.22(4)  |
| Au(1)-Ag(3)-Au(16)  | 100.08(3)  |
| Au(14)-Ag(3)-Au(16) | 54.36(2)   |
| Au(4)-Ag(3)-Au(16)  | 152.92(3)  |
| Au(11)-Ag(3)-Au(16) | 99.08(3)   |
| Au(12)-Ag(3)-Au(16) | 54.427(19) |

|                     |            |
|---------------------|------------|
| Au(9)-Ag(3)-Au(16)  | 152.47(3)  |
| Ag(1)-Ag(3)-Au(15)  | 65.43(3)   |
| Ag(43)-Ag(3)-Au(15) | 110.03(3)  |
| Au(1)-Ag(3)-Au(15)  | 150.53(4)  |
| Au(14)-Ag(3)-Au(15) | 99.89(3)   |
| Au(4)-Ag(3)-Au(15)  | 53.73(2)   |
| Au(11)-Ag(3)-Au(15) | 54.718(19) |
| Au(12)-Ag(3)-Au(15) | 153.27(3)  |
| Au(9)-Ag(3)-Au(15)  | 96.75(3)   |
| Au(16)-Ag(3)-Au(15) | 104.61(3)  |
| Ag(1)-Ag(3)-Au(18)  | 64.98(3)   |
| Ag(43)-Ag(3)-Au(18) | 110.07(4)  |
| Au(1)-Ag(3)-Au(18)  | 54.380(19) |
| Au(14)-Ag(3)-Au(18) | 151.42(3)  |
| Au(4)-Ag(3)-Au(18)  | 98.08(3)   |
| Au(11)-Ag(3)-Au(18) | 152.42(3)  |
| Au(12)-Ag(3)-Au(18) | 97.99(3)   |
| Au(9)-Ag(3)-Au(18)  | 53.866(19) |
| Au(16)-Ag(3)-Au(18) | 103.46(3)  |
| Au(15)-Ag(3)-Au(18) | 103.63(3)  |
| Ag(1)-Ag(3)-Au(13)  | 65.91(3)   |
| Ag(43)-Ag(3)-Au(13) | 118.59(4)  |
| Au(1)-Ag(3)-Au(13)  | 154.07(3)  |
| Au(14)-Ag(3)-Au(13) | 54.99(2)   |
| Au(4)-Ag(3)-Au(13)  | 98.64(3)   |
| Au(11)-Ag(3)-Au(13) | 54.255(19) |
| Au(12)-Ag(3)-Au(13) | 99.36(3)   |
| Au(9)-Ag(3)-Au(13)  | 150.73(3)  |
| Au(16)-Ag(3)-Au(13) | 54.668(19) |
| Au(15)-Ag(3)-Au(13) | 54.388(19) |



|                     |           |
|---------------------|-----------|
| Au(18)-Ag(3)-Au(13) | 130.89(3) |
| S(12)-Ag(4)-Au(5)   | 116.24(7) |
| S(12)-Ag(4)-Au(3)   | 174.52(7) |
| Au(5)-Ag(4)-Au(3)   | 58.92(2)  |
| S(12)-Ag(4)-Au(16)  | 117.31(7) |
| Au(5)-Ag(4)-Au(16)  | 59.69(2)  |
| Au(3)-Ag(4)-Au(16)  | 58.59(2)  |
| S(12)-Ag(4)-Ag(36)  | 52.62(7)  |
| Au(5)-Ag(4)-Ag(36)  | 132.58(4) |
| Au(3)-Ag(4)-Ag(36)  | 127.92(4) |
| Au(16)-Ag(4)-Ag(36) | 84.03(3)  |
| S(12)-Ag(4)-Ag(23)  | 121.44(7) |
| Au(5)-Ag(4)-Ag(23)  | 62.20(3)  |
| Au(3)-Ag(4)-Ag(23)  | 59.59(3)  |
| Au(16)-Ag(4)-Ag(23) | 109.86(4) |
| Ag(36)-Ag(4)-Ag(23) | 164.81(4) |
| S(12)-Ag(4)-Ag(24)  | 55.83(7)  |
| Au(5)-Ag(4)-Ag(24)  | 65.07(3)  |
| Au(3)-Ag(4)-Ag(24)  | 120.74(4) |
| Au(16)-Ag(4)-Ag(24) | 107.43(4) |
| Ag(36)-Ag(4)-Ag(24) | 103.36(4) |
| Ag(23)-Ag(4)-Ag(24) | 78.89(3)  |
| S(12)-Ag(4)-Au(23)  | 124.07(7) |
| Au(5)-Ag(4)-Au(23)  | 114.61(3) |
| Au(3)-Ag(4)-Au(23)  | 61.41(2)  |
| Au(16)-Ag(4)-Au(23) | 107.32(3) |
| Ag(36)-Ag(4)-Au(23) | 104.20(4) |
| Ag(23)-Ag(4)-Au(23) | 66.47(3)  |
| Ag(24)-Ag(4)-Au(23) | 137.30(4) |
| S(12)-Ag(4)-Ag(20)  | 67.90(7)  |

|                     |           |
|---------------------|-----------|
| Au(5)-Ag(4)-Ag(20)  | 65.43(3)  |
| Au(3)-Ag(4)-Ag(20)  | 106.89(3) |
| Au(16)-Ag(4)-Ag(20) | 53.88(2)  |
| Ag(36)-Ag(4)-Ag(20) | 68.67(3)  |
| Ag(23)-Ag(4)-Ag(20) | 124.22(4) |
| Ag(24)-Ag(4)-Ag(20) | 62.60(3)  |
| Au(23)-Ag(4)-Ag(20) | 159.55(4) |
| S(24)-Ag(5)-Au(6)   | 116.51(7) |
| S(24)-Ag(5)-Au(8)   | 173.78(7) |
| Au(6)-Ag(5)-Au(8)   | 58.36(2)  |
| S(24)-Ag(5)-Au(15)  | 115.85(8) |
| Au(6)-Ag(5)-Au(15)  | 59.83(2)  |
| Au(8)-Ag(5)-Au(15)  | 59.05(2)  |
| S(24)-Ag(5)-Ag(26)  | 52.68(8)  |
| Au(6)-Ag(5)-Ag(26)  | 132.35(4) |
| Au(8)-Ag(5)-Ag(26)  | 127.17(4) |
| Au(15)-Ag(5)-Ag(26) | 82.78(3)  |
| S(24)-Ag(5)-Ag(30)  | 121.81(8) |
| Au(6)-Ag(5)-Ag(30)  | 64.61(3)  |
| Au(8)-Ag(5)-Ag(30)  | 60.37(3)  |
| Au(15)-Ag(5)-Ag(30) | 112.28(3) |
| Ag(26)-Ag(5)-Ag(30) | 162.86(4) |
| S(24)-Ag(5)-Ag(25)  | 56.57(7)  |
| Au(6)-Ag(5)-Ag(25)  | 65.39(3)  |
| Au(8)-Ag(5)-Ag(25)  | 120.25(4) |
| Au(15)-Ag(5)-Ag(25) | 107.83(4) |
| Ag(26)-Ag(5)-Ag(25) | 104.60(4) |
| Ag(30)-Ag(5)-Ag(25) | 79.25(4)  |
| S(24)-Ag(5)-Au(22)  | 122.82(7) |
| Au(6)-Ag(5)-Au(22)  | 117.00(3) |

|                     |           |
|---------------------|-----------|
| Au(8)-Ag(5)-Au(22)  | 63.30(2)  |
| Au(15)-Ag(5)-Au(22) | 107.22(3) |
| Ag(26)-Ag(5)-Au(22) | 100.78(3) |
| Ag(30)-Ag(5)-Au(22) | 67.71(3)  |
| Ag(25)-Ag(5)-Au(22) | 138.71(4) |
| S(24)-Ag(5)-Ag(15)  | 66.98(8)  |
| Au(6)-Ag(5)-Ag(15)  | 67.03(3)  |
| Au(8)-Ag(5)-Ag(15)  | 106.96(3) |
| Au(15)-Ag(5)-Ag(15) | 52.87(2)  |
| Ag(26)-Ag(5)-Ag(15) | 66.93(3)  |
| Ag(30)-Ag(5)-Ag(15) | 128.33(4) |
| Ag(25)-Ag(5)-Ag(15) | 64.89(3)  |
| Au(22)-Ag(5)-Ag(15) | 156.37(4) |
| S(9)-Ag(6)-Au(8)    | 173.56(7) |
| S(9)-Ag(6)-Au(2)    | 114.75(7) |
| Au(8)-Ag(6)-Au(2)   | 60.25(2)  |
| S(9)-Ag(6)-Au(7)    | 114.68(8) |
| Au(8)-Ag(6)-Au(7)   | 59.58(2)  |
| Au(2)-Ag(6)-Au(7)   | 57.96(2)  |
| S(9)-Ag(6)-Ag(34)   | 51.92(8)  |
| Au(8)-Ag(6)-Ag(34)  | 126.54(4) |
| Au(2)-Ag(6)-Ag(34)  | 125.46(4) |
| Au(7)-Ag(6)-Ag(34)  | 79.64(3)  |
| S(9)-Ag(6)-Ag(28)   | 54.39(7)  |
| Au(8)-Ag(6)-Ag(28)  | 122.28(4) |
| Au(2)-Ag(6)-Ag(28)  | 64.03(3)  |
| Au(7)-Ag(6)-Ag(28)  | 101.85(3) |
| Ag(34)-Ag(6)-Ag(28) | 97.27(4)  |
| S(9)-Ag(6)-Au(22)   | 123.95(7) |
| Au(8)-Ag(6)-Au(22)  | 62.04(2)  |

|                     |           |
|---------------------|-----------|
| Au(2)-Ag(6)-Au(22)  | 119.40(3) |
| Au(7)-Ag(6)-Au(22)  | 105.36(3) |
| Ag(34)-Ag(6)-Au(22) | 102.75(3) |
| Ag(28)-Ag(6)-Au(22) | 148.60(4) |
| S(9)-Ag(6)-Ag(19)   | 117.00(8) |
| Au(8)-Ag(6)-Ag(19)  | 62.61(3)  |
| Au(2)-Ag(6)-Ag(19)  | 104.52(3) |
| Au(7)-Ag(6)-Ag(19)  | 52.27(2)  |
| Ag(34)-Ag(6)-Ag(19) | 65.34(3)  |
| Ag(28)-Ag(6)-Ag(19) | 149.56(4) |
| Au(22)-Ag(6)-Ag(19) | 61.84(2)  |
| S(9)-Ag(6)-Ag(38)   | 123.15(8) |
| Au(8)-Ag(6)-Ag(38)  | 58.26(3)  |
| Au(2)-Ag(6)-Ag(38)  | 54.44(2)  |
| Au(7)-Ag(6)-Ag(38)  | 103.16(3) |
| Ag(34)-Ag(6)-Ag(38) | 175.02(4) |
| Ag(28)-Ag(6)-Ag(38) | 78.18(3)  |
| Au(22)-Ag(6)-Ag(38) | 80.60(3)  |
| Ag(19)-Ag(6)-Ag(38) | 119.64(4) |
| S(10)-Ag(7)-Au(9)   | 173.56(8) |
| S(10)-Ag(7)-Au(1)   | 116.28(7) |
| Au(9)-Ag(7)-Au(1)   | 58.63(2)  |
| S(10)-Ag(7)-Au(18)  | 121.39(8) |
| Au(9)-Ag(7)-Au(18)  | 60.37(2)  |
| Au(1)-Ag(7)-Au(18)  | 58.28(2)  |
| S(10)-Ag(7)-Ag(37)  | 53.32(8)  |
| Au(9)-Ag(7)-Ag(37)  | 132.65(4) |
| Au(1)-Ag(7)-Ag(37)  | 130.36(4) |
| Au(18)-Ag(7)-Ag(37) | 85.25(3)  |
| S(10)-Ag(7)-Ag(27)  | 112.26(8) |

|                     |           |
|---------------------|-----------|
| Au(9)-Ag(7)-Ag(27)  | 62.08(3)  |
| Au(1)-Ag(7)-Ag(27)  | 58.34(3)  |
| Au(18)-Ag(7)-Ag(27) | 109.24(4) |
| Ag(37)-Ag(7)-Ag(27) | 164.46(4) |
| S(10)-Ag(7)-Ag(18)  | 55.23(7)  |
| Au(9)-Ag(7)-Ag(18)  | 118.59(4) |
| Au(1)-Ag(7)-Ag(18)  | 63.80(3)  |
| Au(18)-Ag(7)-Ag(18) | 105.03(3) |
| Ag(37)-Ag(7)-Ag(18) | 100.20(4) |
| Ag(27)-Ag(7)-Ag(18) | 71.19(3)  |
| S(10)-Ag(7)-Ag(17)  | 122.58(8) |
| Au(9)-Ag(7)-Ag(17)  | 63.76(3)  |
| Au(1)-Ag(7)-Ag(17)  | 105.90(3) |
| Au(18)-Ag(7)-Ag(17) | 54.53(2)  |
| Ag(37)-Ag(7)-Ag(17) | 69.95(3)  |
| Ag(27)-Ag(7)-Ag(17) | 122.76(4) |
| Ag(18)-Ag(7)-Ag(17) | 156.90(4) |
| S(10)-Ag(7)-Au(24)  | 122.48(7) |
| Au(9)-Ag(7)-Au(24)  | 60.24(2)  |
| Au(1)-Ag(7)-Au(24)  | 114.64(3) |
| Au(18)-Ag(7)-Au(24) | 107.05(3) |
| Ag(37)-Ag(7)-Au(24) | 107.19(3) |
| Ag(27)-Ag(7)-Au(24) | 74.61(3)  |
| Ag(18)-Ag(7)-Au(24) | 139.03(4) |
| Ag(17)-Ag(7)-Au(24) | 63.59(3)  |
| S(1)-Ag(8)-Au(3)    | 174.01(7) |
| S(1)-Ag(8)-Au(6)    | 114.61(7) |
| Au(3)-Ag(8)-Au(6)   | 59.69(2)  |
| S(1)-Ag(8)-Au(13)   | 115.52(8) |
| Au(3)-Ag(8)-Au(13)  | 60.56(2)  |

|                     |           |
|---------------------|-----------|
| Au(6)-Ag(8)-Au(13)  | 58.65(2)  |
| S(1)-Ag(8)-Ag(40)   | 52.19(8)  |
| Au(3)-Ag(8)-Ag(40)  | 128.37(4) |
| Au(6)-Ag(8)-Ag(40)  | 124.07(4) |
| Au(13)-Ag(8)-Ag(40) | 78.62(3)  |
| S(1)-Ag(8)-Ag(25)   | 53.89(8)  |
| Au(3)-Ag(8)-Ag(25)  | 121.43(4) |
| Au(6)-Ag(8)-Ag(25)  | 64.35(3)  |
| Au(13)-Ag(8)-Ag(25) | 103.21(3) |
| Ag(40)-Ag(8)-Ag(25) | 96.35(4)  |
| S(1)-Ag(8)-Ag(33)   | 118.76(8) |
| Au(3)-Ag(8)-Ag(33)  | 60.56(3)  |
| Au(6)-Ag(8)-Ag(33)  | 56.99(3)  |
| Au(13)-Ag(8)-Ag(33) | 107.43(3) |
| Ag(40)-Ag(8)-Ag(33) | 170.94(4) |
| Ag(25)-Ag(8)-Ag(33) | 75.88(3)  |
| S(1)-Ag(8)-Ag(29)   | 118.79(8) |
| Au(3)-Ag(8)-Ag(29)  | 63.30(3)  |
| Au(6)-Ag(8)-Ag(29)  | 105.69(3) |
| Au(13)-Ag(8)-Ag(29) | 53.59(2)  |
| Ag(40)-Ag(8)-Ag(29) | 67.40(3)  |
| Ag(25)-Ag(8)-Ag(29) | 152.79(4) |
| Ag(33)-Ag(8)-Ag(29) | 121.56(4) |
| S(1)-Ag(8)-Au(23)   | 125.98(7) |
| Au(3)-Ag(8)-Au(23)  | 59.97(2)  |
| Au(6)-Ag(8)-Au(23)  | 115.12(3) |
| Au(13)-Ag(8)-Au(23) | 107.38(3) |
| Ag(40)-Ag(8)-Au(23) | 110.71(4) |
| Ag(25)-Ag(8)-Au(23) | 142.32(4) |
| Ag(33)-Ag(8)-Au(23) | 74.37(3)  |

|                     |           |
|---------------------|-----------|
| Ag(29)-Ag(8)-Au(23) | 64.74(3)  |
| S(21)-Ag(9)-Au(14)  | 116.74(8) |
| S(21)-Ag(9)-Au(11)  | 172.00(8) |
| Au(14)-Ag(9)-Au(11) | 59.58(2)  |
| S(21)-Ag(9)-Ag(40)  | 52.19(8)  |
| Au(14)-Ag(9)-Ag(40) | 128.71(4) |
| Au(11)-Ag(9)-Ag(40) | 123.40(4) |
| S(21)-Ag(9)-Au(13)  | 113.14(8) |
| Au(14)-Ag(9)-Au(13) | 59.89(2)  |
| Au(11)-Ag(9)-Au(13) | 58.91(2)  |
| Ag(40)-Ag(9)-Au(13) | 78.68(3)  |
| S(21)-Ag(9)-Au(19)  | 121.88(8) |
| Au(14)-Ag(9)-Au(19) | 119.11(3) |
| Au(11)-Ag(9)-Au(19) | 64.07(2)  |
| Ag(40)-Ag(9)-Au(19) | 100.33(3) |
| Au(13)-Ag(9)-Au(19) | 107.48(3) |
| S(21)-Ag(9)-Ag(39)  | 126.31(8) |
| Au(14)-Ag(9)-Ag(39) | 61.41(3)  |
| Au(11)-Ag(9)-Ag(39) | 59.39(3)  |
| Ag(40)-Ag(9)-Ag(39) | 169.88(4) |
| Au(13)-Ag(9)-Ag(39) | 109.34(3) |
| Au(19)-Ag(9)-Ag(39) | 71.69(3)  |
| S(21)-Ag(9)-Ag(35)  | 56.55(8)  |
| Au(14)-Ag(9)-Ag(35) | 65.62(3)  |
| Au(11)-Ag(9)-Ag(35) | 122.83(4) |
| Ag(40)-Ag(9)-Ag(35) | 102.50(4) |
| Au(13)-Ag(9)-Ag(35) | 105.85(3) |
| Au(19)-Ag(9)-Ag(35) | 142.55(4) |
| Ag(39)-Ag(9)-Ag(35) | 81.59(3)  |
| S(21)-Ag(9)-Ag(29)  | 66.71(8)  |

|                      |           |
|----------------------|-----------|
| Au(14)-Ag(9)-Ag(29)  | 65.81(3)  |
| Au(11)-Ag(9)-Ag(29)  | 105.60(3) |
| Ag(40)-Ag(9)-Ag(29)  | 64.87(3)  |
| Au(13)-Ag(9)-Ag(29)  | 51.30(2)  |
| Au(19)-Ag(9)-Ag(29)  | 154.67(4) |
| Ag(39)-Ag(9)-Ag(29)  | 124.84(4) |
| Ag(35)-Ag(9)-Ag(29)  | 62.77(3)  |
| S(18)-Ag(10)-Au(2)   | 119.14(7) |
| S(18)-Ag(10)-Au(10)  | 177.80(7) |
| Au(2)-Ag(10)-Au(10)  | 58.78(2)  |
| S(18)-Ag(10)-Au(18)  | 119.28(8) |
| Au(2)-Ag(10)-Au(18)  | 60.37(2)  |
| Au(10)-Ag(10)-Au(18) | 59.36(2)  |
| S(18)-Ag(10)-Ag(28)  | 57.65(7)  |
| Au(2)-Ag(10)-Ag(28)  | 66.16(3)  |
| Au(10)-Ag(10)-Ag(28) | 120.77(4) |
| Au(18)-Ag(10)-Ag(28) | 109.83(3) |
| S(18)-Ag(10)-Ag(37)  | 52.67(7)  |
| Au(2)-Ag(10)-Ag(37)  | 136.40(4) |
| Au(10)-Ag(10)-Ag(37) | 128.03(4) |
| Au(18)-Ag(10)-Ag(37) | 85.81(3)  |
| Ag(28)-Ag(10)-Ag(37) | 106.16(4) |
| S(18)-Ag(10)-Ag(32)  | 119.13(8) |
| Au(2)-Ag(10)-Ag(32)  | 61.62(3)  |
| Au(10)-Ag(10)-Ag(32) | 60.92(3)  |
| Au(18)-Ag(10)-Ag(32) | 111.31(3) |
| Ag(28)-Ag(10)-Ag(32) | 75.46(3)  |
| Ag(37)-Ag(10)-Ag(32) | 161.47(4) |
| S(18)-Ag(10)-Au(21)  | 119.04(7) |
| Au(2)-Ag(10)-Au(21)  | 116.34(3) |



|                      |           |
|----------------------|-----------|
| Au(10)-Ag(10)-Au(21) | 63.14(2)  |
| Au(18)-Ag(10)-Au(21) | 108.51(3) |
| Ag(28)-Ag(10)-Au(21) | 134.99(4) |
| Ag(37)-Ag(10)-Au(21) | 99.24(3)  |
| Ag(32)-Ag(10)-Au(21) | 69.29(3)  |
| S(18)-Ag(10)-Ag(17)  | 69.13(7)  |
| Au(2)-Ag(10)-Ag(17)  | 68.42(3)  |
| Au(10)-Ag(10)-Ag(17) | 108.95(3) |
| Au(18)-Ag(10)-Ag(17) | 54.40(2)  |
| Ag(28)-Ag(10)-Ag(17) | 66.04(3)  |
| Ag(37)-Ag(10)-Ag(17) | 69.56(3)  |
| Ag(32)-Ag(10)-Ag(17) | 125.79(4) |
| Au(21)-Ag(10)-Ag(17) | 158.97(4) |
| S(18)-Ag(10)-Ag(16)  | 121.48(7) |
| Au(2)-Ag(10)-Ag(16)  | 104.56(3) |
| Au(10)-Ag(10)-Ag(16) | 59.43(3)  |
| Au(18)-Ag(10)-Ag(16) | 53.14(2)  |
| Ag(28)-Ag(10)-Ag(16) | 161.72(4) |
| Ag(37)-Ag(10)-Ag(16) | 68.95(3)  |
| Ag(32)-Ag(10)-Ag(16) | 115.04(4) |
| Au(21)-Ag(10)-Ag(16) | 62.90(3)  |
| Ag(17)-Ag(10)-Ag(16) | 96.13(3)  |
| S(11)-Ag(11)-Au(1)   | 116.18(7) |
| S(11)-Ag(11)-Au(12)  | 172.24(8) |
| Au(1)-Ag(11)-Au(12)  | 59.67(2)  |
| S(11)-Ag(11)-Au(17)  | 113.77(8) |
| Au(1)-Ag(11)-Au(17)  | 59.40(2)  |
| Au(12)-Ag(11)-Au(17) | 58.61(2)  |
| S(11)-Ag(11)-Ag(31)  | 52.06(7)  |
| Au(1)-Ag(11)-Ag(31)  | 130.84(4) |

|                      |           |
|----------------------|-----------|
| Au(12)-Ag(11)-Ag(31) | 124.56(4) |
| Au(17)-Ag(11)-Ag(31) | 81.36(3)  |
| S(11)-Ag(11)-Ag(18)  | 57.24(7)  |
| Au(1)-Ag(11)-Ag(18)  | 64.85(3)  |
| Au(12)-Ag(11)-Ag(18) | 121.67(4) |
| Au(17)-Ag(11)-Ag(18) | 106.27(4) |
| Ag(31)-Ag(11)-Ag(18) | 104.37(4) |
| S(11)-Ag(11)-Au(20)  | 123.15(7) |
| Au(1)-Ag(11)-Au(20)  | 118.38(3) |
| Au(12)-Ag(11)-Au(20) | 63.04(2)  |
| Au(17)-Ag(11)-Au(20) | 106.56(3) |
| Ag(31)-Ag(11)-Au(20) | 99.36(3)  |
| Ag(18)-Ag(11)-Au(20) | 141.80(4) |
| S(11)-Ag(11)-Ag(44)  | 127.20(8) |
| Au(1)-Ag(11)-Ag(44)  | 58.05(3)  |
| Au(12)-Ag(11)-Ag(44) | 57.43(3)  |
| Au(17)-Ag(11)-Ag(44) | 105.59(3) |
| Ag(31)-Ag(11)-Ag(44) | 171.10(4) |
| Ag(18)-Ag(11)-Ag(44) | 79.30(3)  |
| Au(20)-Ag(11)-Ag(44) | 73.53(3)  |
| S(11)-Ag(11)-Ag(16)  | 65.73(8)  |
| Au(1)-Ag(11)-Ag(16)  | 66.59(3)  |
| Au(12)-Ag(11)-Ag(16) | 106.65(3) |
| Au(17)-Ag(11)-Ag(16) | 52.27(2)  |
| Ag(31)-Ag(11)-Ag(16) | 66.10(3)  |
| Ag(18)-Ag(11)-Ag(16) | 63.80(3)  |
| Au(20)-Ag(11)-Ag(16) | 154.41(4) |
| Ag(44)-Ag(11)-Ag(16) | 122.50(4) |
| S(4)-Ag(12)-Au(11)   | 174.77(8) |
| S(4)-Ag(12)-Au(4)    | 115.20(8) |

|                      |           |
|----------------------|-----------|
| Au(11)-Ag(12)-Au(4)  | 59.68(2)  |
| S(4)-Ag(12)-Au(15)   | 118.69(7) |
| Au(11)-Ag(12)-Au(15) | 60.30(2)  |
| Au(4)-Ag(12)-Au(15)  | 58.47(2)  |
| S(4)-Ag(12)-Ag(26)   | 52.71(8)  |
| Au(11)-Ag(12)-Ag(26) | 130.61(4) |
| Au(4)-Ag(12)-Ag(26)  | 128.10(4) |
| Au(15)-Ag(12)-Ag(26) | 82.91(3)  |
| S(4)-Ag(12)-Ag(45)   | 116.22(8) |
| Au(11)-Ag(12)-Ag(45) | 60.82(3)  |
| Au(4)-Ag(12)-Ag(45)  | 58.28(3)  |
| Au(15)-Ag(12)-Ag(45) | 108.18(3) |
| Ag(26)-Ag(12)-Ag(45) | 168.04(4) |
| S(4)-Ag(12)-Ag(22)   | 54.91(8)  |
| Au(11)-Ag(12)-Ag(22) | 119.92(4) |
| Au(4)-Ag(12)-Ag(22)  | 63.24(3)  |
| Au(15)-Ag(12)-Ag(22) | 103.43(3) |
| Ag(26)-Ag(12)-Ag(22) | 98.68(4)  |
| Ag(45)-Ag(12)-Ag(22) | 74.77(3)  |
| S(4)-Ag(12)-Ag(15)   | 120.89(8) |
| Au(11)-Ag(12)-Ag(15) | 63.20(3)  |
| Au(4)-Ag(12)-Ag(15)  | 106.01(3) |
| Au(15)-Ag(12)-Ag(15) | 54.14(2)  |
| Ag(26)-Ag(12)-Ag(15) | 68.78(3)  |
| Ag(45)-Ag(12)-Ag(15) | 121.12(4) |
| Ag(22)-Ag(12)-Ag(15) | 154.35(4) |
| S(4)-Ag(12)-Au(19)   | 123.53(7) |
| Au(11)-Ag(12)-Au(19) | 60.74(2)  |
| Au(4)-Ag(12)-Au(19)  | 116.58(3) |
| Au(15)-Ag(12)-Au(19) | 106.58(3) |

|                      |           |
|----------------------|-----------|
| Ag(26)-Ag(12)-Au(19) | 106.24(3) |
| Ag(45)-Ag(12)-Au(19) | 75.42(3)  |
| Ag(22)-Ag(12)-Au(19) | 142.85(4) |
| Ag(15)-Ag(12)-Au(19) | 62.53(3)  |
| S(15)-Ag(13)-Au(12)  | 175.72(7) |
| S(15)-Ag(13)-Au(14)  | 117.01(7) |
| Au(12)-Ag(13)-Au(14) | 58.73(2)  |
| S(15)-Ag(13)-Au(16)  | 118.48(7) |
| Au(12)-Ag(13)-Au(16) | 60.30(2)  |
| Au(14)-Ag(13)-Au(16) | 58.65(2)  |
| S(15)-Ag(13)-Ag(36)  | 51.91(7)  |
| Au(12)-Ag(13)-Ag(36) | 130.53(4) |
| Au(14)-Ag(13)-Ag(36) | 129.87(4) |
| Au(16)-Ag(13)-Ag(36) | 83.43(3)  |
| S(15)-Ag(13)-Ag(35)  | 55.07(7)  |
| Au(12)-Ag(13)-Ag(35) | 120.82(4) |
| Au(14)-Ag(13)-Ag(35) | 65.39(3)  |
| Au(16)-Ag(13)-Ag(35) | 105.36(4) |
| Ag(36)-Ag(13)-Ag(35) | 99.39(4)  |
| S(15)-Ag(13)-Ag(42)  | 117.65(8) |
| Au(12)-Ag(13)-Ag(42) | 60.25(3)  |
| Au(14)-Ag(13)-Ag(42) | 56.87(3)  |
| Au(16)-Ag(13)-Ag(42) | 107.44(3) |
| Ag(36)-Ag(13)-Ag(42) | 168.49(4) |
| Ag(35)-Ag(13)-Ag(42) | 74.43(3)  |
| S(15)-Ag(13)-Ag(20)  | 119.43(7) |
| Au(12)-Ag(13)-Ag(20) | 63.62(3)  |
| Au(14)-Ag(13)-Ag(20) | 105.66(3) |
| Au(16)-Ag(13)-Ag(20) | 53.80(2)  |
| Ag(36)-Ag(13)-Ag(20) | 67.98(3)  |

|                      |           |
|----------------------|-----------|
| Ag(35)-Ag(13)-Ag(20) | 155.44(4) |
| Ag(42)-Ag(13)-Ag(20) | 121.31(4) |
| S(15)-Ag(13)-Au(20)  | 123.52(7) |
| Au(12)-Ag(13)-Au(20) | 60.15(2)  |
| Au(14)-Ag(13)-Au(20) | 114.50(3) |
| Au(16)-Ag(13)-Au(20) | 106.94(3) |
| Ag(36)-Ag(13)-Au(20) | 106.74(4) |
| Ag(35)-Ag(13)-Au(20) | 140.24(4) |
| Ag(42)-Ag(13)-Au(20) | 74.23(3)  |
| Ag(20)-Ag(13)-Au(20) | 64.18(3)  |
| S(23)-Ag(14)-Au(10)  | 175.27(8) |
| S(23)-Ag(14)-Au(5)   | 117.54(7) |
| Au(10)-Ag(14)-Au(5)  | 58.84(2)  |
| S(23)-Ag(14)-Au(17)  | 120.40(8) |
| Au(10)-Ag(14)-Au(17) | 61.12(2)  |
| Au(5)-Ag(14)-Au(17)  | 58.80(2)  |
| S(23)-Ag(14)-Ag(31)  | 53.35(8)  |
| Au(10)-Ag(14)-Ag(31) | 131.07(4) |
| Au(5)-Ag(14)-Ag(31)  | 129.50(4) |
| Au(17)-Ag(14)-Ag(31) | 83.00(3)  |
| S(23)-Ag(14)-Ag(24)  | 56.18(7)  |
| Au(10)-Ag(14)-Ag(24) | 119.32(4) |
| Au(5)-Ag(14)-Ag(24)  | 64.51(3)  |
| Au(17)-Ag(14)-Ag(24) | 105.75(3) |
| Ag(31)-Ag(14)-Ag(24) | 100.87(4) |
| S(23)-Ag(14)-Ag(41)  | 114.93(8) |
| Au(10)-Ag(14)-Ag(41) | 60.85(3)  |
| Au(5)-Ag(14)-Ag(41)  | 58.40(3)  |
| Au(17)-Ag(14)-Ag(41) | 109.29(3) |
| Ag(31)-Ag(14)-Ag(41) | 167.12(4) |

|                      |           |
|----------------------|-----------|
| Ag(24)-Ag(14)-Ag(41) | 72.59(3)  |
| S(23)-Ag(14)-Ag(16)  | 121.23(8) |
| Au(10)-Ag(14)-Ag(16) | 63.46(3)  |
| Au(5)-Ag(14)-Ag(16)  | 105.81(3) |
| Au(17)-Ag(14)-Ag(16) | 54.39(2)  |
| Ag(31)-Ag(14)-Ag(16) | 68.81(3)  |
| Ag(24)-Ag(14)-Ag(16) | 157.54(4) |
| Ag(41)-Ag(14)-Ag(16) | 121.17(4) |
| S(23)-Ag(14)-Au(21)  | 122.56(7) |
| Au(10)-Ag(14)-Au(21) | 59.36(2)  |
| Au(5)-Ag(14)-Au(21)  | 114.25(3) |
| Au(17)-Ag(14)-Au(21) | 106.45(3) |
| Ag(31)-Ag(14)-Au(21) | 107.05(3) |
| Ag(24)-Ag(14)-Au(21) | 139.36(4) |
| Ag(41)-Ag(14)-Au(21) | 73.82(3)  |
| Ag(16)-Ag(14)-Au(21) | 62.68(3)  |
| S(23)-Ag(14)-Ag(20)  | 72.97(7)  |
| Au(10)-Ag(14)-Ag(20) | 106.43(3) |
| Au(5)-Ag(14)-Ag(20)  | 61.75(3)  |
| Au(17)-Ag(14)-Ag(20) | 52.79(2)  |
| Ag(31)-Ag(14)-Ag(20) | 69.11(3)  |
| Ag(24)-Ag(14)-Ag(20) | 60.16(3)  |
| Ag(41)-Ag(14)-Ag(20) | 114.80(4) |
| Ag(16)-Ag(14)-Ag(20) | 97.39(3)  |
| Au(21)-Ag(14)-Ag(20) | 158.74(3) |
| S(17)-Ag(15)-Au(15)  | 153.36(7) |
| S(17)-Ag(15)-Au(13)  | 116.47(7) |
| Au(15)-Ag(15)-Au(13) | 63.27(2)  |
| S(17)-Ag(15)-Au(11)  | 98.63(7)  |
| Au(15)-Ag(15)-Au(11) | 57.80(2)  |

|                      |            |
|----------------------|------------|
| Au(13)-Ag(15)-Au(11) | 56.48(2)   |
| S(17)-Ag(15)-Ag(12)  | 98.26(8)   |
| Au(15)-Ag(15)-Ag(12) | 58.53(3)   |
| Au(13)-Ag(15)-Ag(12) | 103.95(3)  |
| Au(11)-Ag(15)-Ag(12) | 52.78(2)   |
| S(17)-Ag(15)-Ag(5)   | 141.06(7)  |
| Au(15)-Ag(15)-Ag(5)  | 56.72(2)   |
| Au(13)-Ag(15)-Ag(5)  | 99.63(3)   |
| Au(11)-Ag(15)-Ag(5)  | 113.93(3)  |
| Ag(12)-Ag(15)-Ag(5)  | 85.97(3)   |
| S(17)-Ag(15)-Au(19)  | 44.99(7)   |
| Au(15)-Ag(15)-Au(19) | 108.42(3)  |
| Au(13)-Ag(15)-Au(19) | 100.79(3)  |
| Au(11)-Ag(15)-Au(19) | 57.05(2)   |
| Ag(12)-Ag(15)-Au(19) | 60.47(3)   |
| Ag(5)-Ag(15)-Au(19)  | 144.00(4)  |
| S(17)-Ag(15)-Ag(25)  | 104.90(7)  |
| Au(15)-Ag(15)-Ag(25) | 101.43(3)  |
| Au(13)-Ag(15)-Ag(25) | 97.50(3)   |
| Au(11)-Ag(15)-Ag(25) | 151.17(3)  |
| Ag(12)-Ag(15)-Ag(25) | 136.96(4)  |
| Ag(5)-Ag(15)-Ag(25)  | 53.58(3)   |
| Au(19)-Ag(15)-Ag(25) | 149.62(3)  |
| S(17)-Ag(15)-Au(6)   | 149.49(8)  |
| Au(15)-Ag(15)-Au(6)  | 54.13(2)   |
| Au(13)-Ag(15)-Au(6)  | 52.966(19) |
| Au(11)-Ag(15)-Au(6)  | 96.13(3)   |
| Ag(12)-Ag(15)-Au(6)  | 111.91(3)  |
| Ag(5)-Ag(15)-Au(6)   | 49.92(2)   |
| Au(19)-Ag(15)-Au(6)  | 151.98(3)  |

|                      |           |
|----------------------|-----------|
| Ag(25)-Ag(15)-Au(6)  | 55.42(2)  |
| S(17)-Ag(15)-Ag(26)  | 100.80(7) |
| Au(15)-Ag(15)-Ag(26) | 76.24(3)  |
| Au(13)-Ag(15)-Ag(26) | 139.40(4) |
| Au(11)-Ag(15)-Ag(26) | 104.54(3) |
| Ag(12)-Ag(15)-Ag(26) | 52.57(3)  |
| Ag(5)-Ag(15)-Ag(26)  | 52.05(3)  |
| Au(19)-Ag(15)-Ag(26) | 94.21(3)  |
| Ag(25)-Ag(15)-Ag(26) | 87.33(3)  |
| Au(6)-Ag(15)-Ag(26)  | 101.11(3) |
| S(3)-Ag(16)-Au(17)   | 152.76(7) |
| S(3)-Ag(16)-Au(18)   | 116.28(7) |
| Au(17)-Ag(16)-Au(18) | 62.23(2)  |
| S(3)-Ag(16)-Au(10)   | 97.43(7)  |
| Au(17)-Ag(16)-Au(10) | 58.07(2)  |
| Au(18)-Ag(16)-Au(10) | 56.02(2)  |
| S(3)-Ag(16)-Ag(14)   | 98.83(8)  |
| Au(17)-Ag(16)-Ag(14) | 57.86(3)  |
| Au(18)-Ag(16)-Ag(14) | 102.62(3) |
| Au(10)-Ag(16)-Ag(14) | 52.65(2)  |
| S(3)-Ag(16)-Ag(11)   | 142.15(7) |
| Au(17)-Ag(16)-Ag(11) | 56.81(3)  |
| Au(18)-Ag(16)-Ag(11) | 98.97(3)  |
| Au(10)-Ag(16)-Ag(11) | 114.31(3) |
| Ag(14)-Ag(16)-Ag(11) | 85.71(3)  |
| S(3)-Ag(16)-Ag(18)   | 105.87(7) |
| Au(17)-Ag(16)-Ag(18) | 101.19(3) |
| Au(18)-Ag(16)-Ag(18) | 97.49(3)  |
| Au(10)-Ag(16)-Ag(18) | 151.02(3) |
| Ag(14)-Ag(16)-Ag(18) | 136.79(4) |



|                      |            |
|----------------------|------------|
| Ag(11)-Ag(16)-Ag(18) | 53.35(3)   |
| S(3)-Ag(16)-Au(21)   | 44.80(7)   |
| Au(17)-Ag(16)-Au(21) | 107.99(3)  |
| Au(18)-Ag(16)-Au(21) | 99.87(3)   |
| Au(10)-Ag(16)-Au(21) | 55.994(19) |
| Ag(14)-Ag(16)-Au(21) | 61.18(3)   |
| Ag(11)-Ag(16)-Au(21) | 144.72(4)  |
| Ag(18)-Ag(16)-Au(21) | 150.49(3)  |
| S(3)-Ag(16)-Au(1)    | 149.74(8)  |
| Au(17)-Ag(16)-Au(1)  | 53.91(2)   |
| Au(18)-Ag(16)-Au(1)  | 53.004(19) |
| Au(10)-Ag(16)-Au(1)  | 96.44(3)   |
| Ag(14)-Ag(16)-Au(1)  | 110.96(3)  |
| Ag(11)-Ag(16)-Au(1)  | 49.40(2)   |
| Ag(18)-Ag(16)-Au(1)  | 55.04(2)   |
| Au(21)-Ag(16)-Au(1)  | 151.21(3)  |
| S(3)-Ag(16)-Ag(10)   | 64.74(7)   |
| Au(17)-Ag(16)-Ag(10) | 101.58(3)  |
| Au(18)-Ag(16)-Ag(10) | 53.64(2)   |
| Au(10)-Ag(16)-Ag(10) | 50.99(2)   |
| Ag(14)-Ag(16)-Ag(10) | 96.85(3)   |
| Ag(11)-Ag(16)-Ag(10) | 152.46(4)  |
| Ag(18)-Ag(16)-Ag(10) | 125.61(4)  |
| Au(21)-Ag(16)-Ag(10) | 52.66(2)   |
| Au(1)-Ag(16)-Ag(10)  | 105.14(3)  |
| S(3)-Ag(16)-Ag(31)   | 102.08(7)  |
| Au(17)-Ag(16)-Ag(31) | 75.64(3)   |
| Au(18)-Ag(16)-Ag(31) | 137.80(4)  |
| Au(10)-Ag(16)-Ag(31) | 104.15(3)  |
| Ag(14)-Ag(16)-Ag(31) | 52.19(3)   |

|                      |           |
|----------------------|-----------|
| Ag(11)-Ag(16)-Ag(31) | 51.99(3)  |
| Ag(18)-Ag(16)-Ag(31) | 87.80(3)  |
| Au(21)-Ag(16)-Ag(31) | 95.05(3)  |
| Au(1)-Ag(16)-Ag(31)  | 100.40(3) |
| Ag(10)-Ag(16)-Ag(31) | 145.76(4) |
| S(14)-Ag(17)-Au(18)  | 152.41(7) |
| S(14)-Ag(17)-Au(7)   | 115.11(8) |
| Au(18)-Ag(17)-Au(7)  | 62.68(2)  |
| S(14)-Ag(17)-Ag(7)   | 98.25(7)  |
| Au(18)-Ag(17)-Ag(7)  | 58.65(3)  |
| Au(7)-Ag(17)-Ag(7)   | 103.81(3) |
| S(14)-Ag(17)-Au(9)   | 97.21(7)  |
| Au(18)-Ag(17)-Au(9)  | 57.58(2)  |
| Au(7)-Ag(17)-Au(9)   | 56.48(2)  |
| Ag(7)-Ag(17)-Au(9)   | 52.77(2)  |
| S(14)-Ag(17)-Ag(10)  | 141.78(8) |
| Au(18)-Ag(17)-Ag(10) | 57.64(3)  |
| Au(7)-Ag(17)-Ag(10)  | 100.54(3) |
| Ag(7)-Ag(17)-Ag(10)  | 85.54(3)  |
| Au(9)-Ag(17)-Ag(10)  | 114.43(3) |
| S(14)-Ag(17)-Ag(28)  | 105.43(7) |
| Au(18)-Ag(17)-Ag(28) | 102.02(3) |
| Au(7)-Ag(17)-Ag(28)  | 98.54(3)  |
| Ag(7)-Ag(17)-Ag(28)  | 136.39(4) |
| Au(9)-Ag(17)-Ag(28)  | 152.19(4) |
| Ag(10)-Ag(17)-Ag(28) | 53.54(3)  |
| S(14)-Ag(17)-Au(24)  | 44.69(7)  |
| Au(18)-Ag(17)-Au(24) | 107.72(3) |
| Au(7)-Ag(17)-Au(24)  | 100.00(3) |
| Ag(7)-Ag(17)-Au(24)  | 60.41(3)  |

|                      |            |
|----------------------|------------|
| Au(9)-Ag(17)-Au(24)  | 56.148(19) |
| Ag(10)-Ag(17)-Au(24) | 143.56(4)  |
| Ag(28)-Ag(17)-Au(24) | 149.72(3)  |
| S(14)-Ag(17)-Au(2)   | 148.71(8)  |
| Au(18)-Ag(17)-Au(2)  | 54.59(2)   |
| Au(7)-Ag(17)-Au(2)   | 52.836(19) |
| Ag(7)-Ag(17)-Au(2)   | 112.42(3)  |
| Au(9)-Ag(17)-Au(2)   | 96.52(3)   |
| Ag(10)-Ag(17)-Au(2)  | 51.23(2)   |
| Ag(28)-Ag(17)-Au(2)  | 55.93(2)   |
| Au(24)-Ag(17)-Au(2)  | 151.27(3)  |
| S(22)-Ag(18)-S(10)   | 129.10(11) |
| S(22)-Ag(18)-S(11)   | 120.00(11) |
| S(10)-Ag(18)-S(11)   | 108.18(10) |
| S(22)-Ag(18)-Ag(7)   | 100.55(7)  |
| S(10)-Ag(18)-Ag(7)   | 53.06(7)   |
| S(11)-Ag(18)-Ag(7)   | 130.53(7)  |
| S(22)-Ag(18)-Ag(11)  | 87.73(8)   |
| S(10)-Ag(18)-Ag(11)  | 137.71(7)  |
| S(11)-Ag(18)-Ag(11)  | 52.81(7)   |
| Ag(7)-Ag(18)-Ag(11)  | 106.85(4)  |
| S(22)-Ag(18)-Au(1)   | 78.09(7)   |
| S(10)-Ag(18)-Au(1)   | 107.44(7)  |
| S(11)-Ag(18)-Au(1)   | 102.88(7)  |
| Ag(7)-Ag(18)-Au(1)   | 56.72(3)   |
| Ag(11)-Ag(18)-Au(1)  | 54.63(2)   |
| S(22)-Ag(18)-Ag(16)  | 140.10(7)  |
| S(10)-Ag(18)-Ag(16)  | 74.88(7)   |
| S(11)-Ag(18)-Ag(16)  | 64.05(7)   |
| Ag(7)-Ag(18)-Ag(16)  | 66.69(3)   |

|                      |           |
|----------------------|-----------|
| Ag(11)-Ag(18)-Ag(16) | 62.85(3)  |
| Au(1)-Ag(18)-Ag(16)  | 63.16(2)  |
| S(2)-Ag(19)-Au(7)    | 151.57(8) |
| S(2)-Ag(19)-Au(15)   | 116.18(7) |
| Au(7)-Ag(19)-Au(15)  | 63.22(2)  |
| S(2)-Ag(19)-Au(8)    | 97.96(8)  |
| Au(7)-Ag(19)-Au(8)   | 56.89(2)  |
| Au(15)-Ag(19)-Au(8)  | 55.86(2)  |
| S(2)-Ag(19)-Ag(2)    | 140.79(7) |
| Au(7)-Ag(19)-Ag(2)   | 57.74(2)  |
| Au(15)-Ag(19)-Ag(2)  | 100.84(3) |
| Au(8)-Ag(19)-Ag(2)   | 113.99(3) |
| S(2)-Ag(19)-Ag(6)    | 96.52(7)  |
| Au(7)-Ag(19)-Ag(6)   | 58.09(2)  |
| Au(15)-Ag(19)-Ag(6)  | 101.79(3) |
| Au(8)-Ag(19)-Ag(6)   | 50.41(2)  |
| Ag(2)-Ag(19)-Ag(6)   | 87.68(3)  |
| S(2)-Ag(19)-Ag(22)   | 105.41(8) |
| Au(7)-Ag(19)-Ag(22)  | 102.61(3) |
| Au(15)-Ag(19)-Ag(22) | 98.96(3)  |
| Au(8)-Ag(19)-Ag(22)  | 151.83(4) |
| Ag(2)-Ag(19)-Ag(22)  | 53.70(3)  |
| Ag(6)-Ag(19)-Ag(22)  | 139.00(4) |
| S(2)-Ag(19)-Au(4)    | 149.72(7) |
| Au(7)-Ag(19)-Au(4)   | 55.41(2)  |
| Au(15)-Ag(19)-Au(4)  | 53.31(2)  |
| Au(8)-Ag(19)-Au(4)   | 96.22(3)  |
| Ag(2)-Ag(19)-Au(4)   | 51.20(2)  |
| Ag(6)-Ag(19)-Au(4)   | 113.07(3) |
| Ag(22)-Ag(19)-Au(4)  | 55.86(2)  |

|                      |           |
|----------------------|-----------|
| S(2)-Ag(19)-Au(22)   | 44.81(8)  |
| Au(7)-Ag(19)-Au(22)  | 106.80(3) |
| Au(15)-Ag(19)-Au(22) | 100.27(3) |
| Au(8)-Ag(19)-Au(22)  | 56.69(2)  |
| Ag(2)-Ag(19)-Au(22)  | 142.54(4) |
| Ag(6)-Ag(19)-Au(22)  | 57.82(2)  |
| Ag(22)-Ag(19)-Au(22) | 149.79(3) |
| Au(4)-Ag(19)-Au(22)  | 151.80(3) |
| S(2)-Ag(19)-Ag(34)   | 100.05(7) |
| Au(7)-Ag(19)-Ag(34)  | 75.84(3)  |
| Au(15)-Ag(19)-Ag(34) | 139.05(4) |
| Au(8)-Ag(19)-Ag(34)  | 102.81(3) |
| Ag(2)-Ag(19)-Ag(34)  | 52.55(3)  |
| Ag(6)-Ag(19)-Ag(34)  | 53.28(3)  |
| Ag(22)-Ag(19)-Ag(34) | 88.53(3)  |
| Au(4)-Ag(19)-Ag(34)  | 102.69(3) |
| Au(22)-Ag(19)-Ag(34) | 92.01(3)  |
| S(30)-Ag(20)-Au(16)  | 147.63(7) |
| S(30)-Ag(20)-Au(17)  | 114.63(7) |
| Au(16)-Ag(20)-Au(17) | 63.52(2)  |
| S(30)-Ag(20)-Au(12)  | 94.38(7)  |
| Au(16)-Ag(20)-Au(12) | 56.76(2)  |
| Au(17)-Ag(20)-Au(12) | 55.48(2)  |
| S(30)-Ag(20)-Ag(4)   | 142.51(7) |
| Au(16)-Ag(20)-Ag(4)  | 57.65(3)  |
| Au(17)-Ag(20)-Ag(4)  | 101.98(3) |
| Au(12)-Ag(20)-Ag(4)  | 113.64(3) |
| S(30)-Ag(20)-Ag(13)  | 94.37(7)  |
| Au(16)-Ag(20)-Ag(13) | 57.26(3)  |
| Au(17)-Ag(20)-Ag(13) | 102.29(3) |

|                      |            |
|----------------------|------------|
| Au(12)-Ag(20)-Ag(13) | 51.65(2)   |
| Ag(4)-Ag(20)-Ag(13)  | 85.15(3)   |
| S(30)-Ag(20)-Ag(24)  | 107.04(7)  |
| Au(16)-Ag(20)-Ag(24) | 104.88(3)  |
| Au(17)-Ag(20)-Ag(24) | 100.88(3)  |
| Au(12)-Ag(20)-Ag(24) | 153.84(4)  |
| Ag(4)-Ag(20)-Ag(24)  | 55.90(3)   |
| Ag(13)-Ag(20)-Ag(24) | 137.99(4)  |
| S(30)-Ag(20)-Au(5)   | 152.85(7)  |
| Au(16)-Ag(20)-Au(5)  | 55.40(2)   |
| Au(17)-Ag(20)-Au(5)  | 54.64(2)   |
| Au(12)-Ag(20)-Au(5)  | 96.62(3)   |
| Ag(4)-Ag(20)-Au(5)   | 51.23(2)   |
| Ag(13)-Ag(20)-Au(5)  | 111.89(3)  |
| Ag(24)-Ag(20)-Au(5)  | 57.65(2)   |
| S(30)-Ag(20)-Ag(14)  | 102.15(7)  |
| Au(16)-Ag(20)-Ag(14) | 100.95(3)  |
| Au(17)-Ag(20)-Ag(14) | 54.00(2)   |
| Au(12)-Ag(20)-Ag(14) | 108.11(3)  |
| Ag(4)-Ag(20)-Ag(14)  | 92.58(3)   |
| Ag(13)-Ag(20)-Ag(14) | 155.22(4)  |
| Ag(24)-Ag(20)-Ag(14) | 53.47(3)   |
| Au(5)-Ag(20)-Ag(14)  | 50.79(2)   |
| S(30)-Ag(20)-Au(20)  | 42.75(7)   |
| Au(16)-Ag(20)-Au(20) | 104.94(3)  |
| Au(17)-Ag(20)-Au(20) | 98.15(3)   |
| Au(12)-Ag(20)-Au(20) | 54.765(19) |
| Ag(4)-Ag(20)-Au(20)  | 141.42(4)  |
| Ag(13)-Ag(20)-Au(20) | 58.42(2)   |
| Ag(24)-Ag(20)-Au(20) | 149.45(4)  |

|                      |            |
|----------------------|------------|
| Au(5)-Ag(20)-Au(20)  | 150.51(3)  |
| Ag(14)-Ag(20)-Au(20) | 125.73(3)  |
| S(20)-Ag(21)-S(6)    | 139.55(10) |
| S(20)-Ag(21)-Au(9)   | 138.87(7)  |
| S(6)-Ag(21)-Au(9)    | 80.93(7)   |
| S(20)-Ag(21)-Ag(2)   | 97.32(8)   |
| S(6)-Ag(21)-Ag(2)    | 101.81(7)  |
| Au(9)-Ag(21)-Ag(2)   | 58.36(3)   |
| S(20)-Ag(21)-Au(4)   | 82.83(7)   |
| S(6)-Ag(21)-Au(4)    | 137.23(7)  |
| Au(9)-Ag(21)-Au(4)   | 56.31(2)   |
| Ag(2)-Ag(21)-Au(4)   | 56.95(3)   |
| S(20)-Ag(21)-Ag(43)  | 104.39(7)  |
| S(6)-Ag(21)-Ag(43)   | 104.54(7)  |
| Au(9)-Ag(21)-Ag(43)  | 58.75(3)   |
| Ag(2)-Ag(21)-Ag(43)  | 104.98(3)  |
| Au(4)-Ag(21)-Ag(43)  | 56.22(2)   |
| S(20)-Ag(21)-Ag(45)  | 48.01(7)   |
| S(6)-Ag(21)-Ag(45)   | 151.80(7)  |
| Au(9)-Ag(21)-Ag(45)  | 101.94(3)  |
| Ag(2)-Ag(21)-Ag(45)  | 103.44(4)  |
| Au(4)-Ag(21)-Ag(45)  | 53.63(2)   |
| Ag(43)-Ag(21)-Ag(45) | 56.66(3)   |
| S(20)-Ag(21)-Au(24)  | 138.81(8)  |
| S(6)-Ag(21)-Au(24)   | 44.83(7)   |
| Au(9)-Ag(21)-Au(24)  | 58.32(2)   |
| Ag(2)-Ag(21)-Au(24)  | 56.99(3)   |
| Au(4)-Ag(21)-Au(24)  | 103.16(3)  |
| Ag(43)-Ag(21)-Au(24) | 112.77(3)  |
| Ag(45)-Ag(21)-Au(24) | 156.79(3)  |

|                      |            |
|----------------------|------------|
| S(20)-Ag(22)-S(4)    | 119.52(10) |
| S(20)-Ag(22)-S(16)   | 128.46(10) |
| S(4)-Ag(22)-S(16)    | 109.42(10) |
| S(20)-Ag(22)-Ag(2)   | 95.76(7)   |
| S(4)-Ag(22)-Ag(2)    | 136.02(7)  |
| S(16)-Ag(22)-Ag(2)   | 54.06(7)   |
| S(20)-Ag(22)-Ag(12)  | 92.82(7)   |
| S(4)-Ag(22)-Ag(12)   | 51.45(7)   |
| S(16)-Ag(22)-Ag(12)  | 132.19(7)  |
| Ag(2)-Ag(22)-Ag(12)  | 105.81(4)  |
| S(20)-Ag(22)-Au(4)   | 78.84(7)   |
| S(4)-Ag(22)-Au(4)    | 103.71(7)  |
| S(16)-Ag(22)-Au(4)   | 105.31(6)  |
| Ag(2)-Ag(22)-Au(4)   | 55.48(3)   |
| Ag(12)-Ag(22)-Au(4)  | 54.64(2)   |
| S(20)-Ag(22)-Ag(19)  | 141.19(7)  |
| S(4)-Ag(22)-Ag(19)   | 75.12(7)   |
| S(16)-Ag(22)-Ag(19)  | 64.76(7)   |
| Ag(2)-Ag(22)-Ag(19)  | 60.93(3)   |
| Ag(12)-Ag(22)-Ag(19) | 67.74(3)   |
| Au(4)-Ag(22)-Ag(19)  | 62.45(2)   |
| S(8)-Ag(23)-S(13)    | 138.87(10) |
| S(8)-Ag(23)-Au(3)    | 137.21(7)  |
| S(13)-Ag(23)-Au(3)   | 81.49(7)   |
| S(8)-Ag(23)-Ag(4)    | 91.67(8)   |
| S(13)-Ag(23)-Ag(4)   | 102.90(7)  |
| Au(3)-Ag(23)-Ag(4)   | 58.83(3)   |
| S(8)-Ag(23)-Au(5)    | 81.61(7)   |
| S(13)-Ag(23)-Au(5)   | 138.11(7)  |
| Au(3)-Ag(23)-Au(5)   | 56.65(2)   |



|                      |            |
|----------------------|------------|
| Ag(4)-Ag(23)-Au(5)   | 56.04(3)   |
| S(8)-Ag(23)-Ag(46)   | 106.03(8)  |
| S(13)-Ag(23)-Ag(46)  | 106.48(7)  |
| Au(3)-Ag(23)-Ag(46)  | 60.72(3)   |
| Ag(4)-Ag(23)-Ag(46)  | 105.87(4)  |
| Au(5)-Ag(23)-Ag(46)  | 56.73(3)   |
| S(8)-Ag(23)-Au(23)   | 133.84(8)  |
| S(13)-Ag(23)-Au(23)  | 45.28(7)   |
| Au(3)-Ag(23)-Au(23)  | 58.02(2)   |
| Ag(4)-Ag(23)-Au(23)  | 57.66(3)   |
| Au(5)-Ag(23)-Au(23)  | 102.82(3)  |
| Ag(46)-Ag(23)-Au(23) | 114.69(3)  |
| S(8)-Ag(23)-Ag(41)   | 47.33(8)   |
| S(13)-Ag(23)-Ag(41)  | 155.65(7)  |
| Au(3)-Ag(23)-Ag(41)  | 103.95(3)  |
| Ag(4)-Ag(23)-Ag(41)  | 100.08(4)  |
| Au(5)-Ag(23)-Ag(41)  | 53.41(2)   |
| Ag(46)-Ag(23)-Ag(41) | 58.88(3)   |
| Au(23)-Ag(23)-Ag(41) | 155.83(3)  |
| S(8)-Ag(24)-S(23)    | 126.50(11) |
| S(8)-Ag(24)-S(12)    | 121.07(11) |
| S(23)-Ag(24)-S(12)   | 109.75(10) |
| S(8)-Ag(24)-Ag(14)   | 97.71(8)   |
| S(23)-Ag(24)-Ag(14)  | 52.63(7)   |
| S(12)-Ag(24)-Ag(14)  | 132.84(7)  |
| S(8)-Ag(24)-Ag(4)    | 89.86(7)   |
| S(23)-Ag(24)-Ag(4)   | 136.46(7)  |
| S(12)-Ag(24)-Ag(4)   | 53.85(7)   |
| Ag(14)-Ag(24)-Ag(4)  | 105.47(4)  |
| S(8)-Ag(24)-Au(5)    | 78.12(7)   |

|                      |            |
|----------------------|------------|
| S(23)-Ag(24)-Au(5)   | 105.84(7)  |
| S(12)-Ag(24)-Au(5)   | 104.15(7)  |
| Ag(14)-Ag(24)-Au(5)  | 55.72(2)   |
| Ag(4)-Ag(24)-Au(5)   | 54.01(2)   |
| S(8)-Ag(24)-Ag(20)   | 139.03(7)  |
| S(23)-Ag(24)-Ag(20)  | 74.96(7)   |
| S(12)-Ag(24)-Ag(20)  | 66.72(7)   |
| Ag(14)-Ag(24)-Ag(20) | 66.36(3)   |
| Ag(4)-Ag(24)-Ag(20)  | 61.50(3)   |
| Au(5)-Ag(24)-Ag(20)  | 61.55(2)   |
| S(27)-Ag(25)-S(1)    | 123.78(11) |
| S(27)-Ag(25)-S(24)   | 123.38(11) |
| S(1)-Ag(25)-S(24)    | 111.18(10) |
| S(27)-Ag(25)-Ag(5)   | 90.45(8)   |
| S(1)-Ag(25)-Ag(5)    | 136.47(7)  |
| S(24)-Ag(25)-Ag(5)   | 53.27(6)   |
| S(27)-Ag(25)-Ag(8)   | 93.51(7)   |
| S(1)-Ag(25)-Ag(8)    | 52.35(7)   |
| S(24)-Ag(25)-Ag(8)   | 133.52(7)  |
| Ag(5)-Ag(25)-Ag(8)   | 105.33(4)  |
| S(27)-Ag(25)-Au(6)   | 77.43(7)   |
| S(1)-Ag(25)-Au(6)    | 103.56(7)  |
| S(24)-Ag(25)-Au(6)   | 103.47(6)  |
| Ag(5)-Ag(25)-Au(6)   | 54.44(2)   |
| Ag(8)-Ag(25)-Au(6)   | 54.18(2)   |
| S(27)-Ag(25)-Ag(15)  | 139.31(7)  |
| S(1)-Ag(25)-Ag(15)   | 75.05(7)   |
| S(24)-Ag(25)-Ag(15)  | 64.42(7)   |
| Ag(5)-Ag(25)-Ag(15)  | 61.53(3)   |
| Ag(8)-Ag(25)-Ag(15)  | 69.15(3)   |

|                      |            |
|----------------------|------------|
| Au(6)-Ag(25)-Ag(15)  | 62.44(2)   |
| S(4)-Ag(26)-S(24)    | 170.89(11) |
| S(4)-Ag(26)-Ag(12)   | 54.64(8)   |
| S(24)-Ag(26)-Ag(12)  | 123.39(8)  |
| S(4)-Ag(26)-Ag(5)    | 132.15(7)  |
| S(24)-Ag(26)-Ag(5)   | 55.36(7)   |
| Ag(12)-Ag(26)-Ag(5)  | 96.33(4)   |
| S(4)-Ag(26)-Ag(15)   | 112.78(8)  |
| S(24)-Ag(26)-Ag(15)  | 64.76(8)   |
| Ag(12)-Ag(26)-Ag(15) | 58.66(3)   |
| Ag(5)-Ag(26)-Ag(15)  | 61.02(3)   |
| S(22)-Ag(27)-S(6)    | 137.96(10) |
| S(22)-Ag(27)-Au(1)   | 83.40(7)   |
| S(6)-Ag(27)-Au(1)    | 136.58(7)  |
| S(22)-Ag(27)-Ag(7)   | 101.56(7)  |
| S(6)-Ag(27)-Ag(7)    | 92.71(7)   |
| Au(1)-Ag(27)-Ag(7)   | 59.59(3)   |
| S(22)-Ag(27)-Au(9)   | 140.05(7)  |
| S(6)-Ag(27)-Au(9)    | 80.04(7)   |
| Au(1)-Ag(27)-Au(9)   | 57.01(2)   |
| Ag(7)-Ag(27)-Au(9)   | 55.95(2)   |
| S(22)-Ag(27)-Ag(44)  | 50.09(8)   |
| S(6)-Ag(27)-Ag(44)   | 152.61(7)  |
| Au(1)-Ag(27)-Ag(44)  | 57.36(3)   |
| Ag(7)-Ag(27)-Ag(44)  | 112.22(4)  |
| Au(9)-Ag(27)-Ag(44)  | 104.04(3)  |
| S(22)-Ag(27)-Ag(43)  | 110.13(8)  |
| S(6)-Ag(27)-Ag(43)   | 103.13(7)  |
| Au(1)-Ag(27)-Ag(43)  | 60.66(3)   |
| Ag(7)-Ag(27)-Ag(43)  | 106.40(4)  |

|                      |            |
|----------------------|------------|
| Au(9)-Ag(27)-Ag(43)  | 57.28(3)   |
| Ag(44)-Ag(27)-Ag(43) | 60.10(3)   |
| S(26)-Ag(28)-S(9)    | 117.46(10) |
| S(26)-Ag(28)-S(18)   | 130.54(10) |
| S(9)-Ag(28)-S(18)    | 110.05(10) |
| S(26)-Ag(28)-Ag(10)  | 96.77(7)   |
| S(9)-Ag(28)-Ag(10)   | 135.01(7)  |
| S(18)-Ag(28)-Ag(10)  | 54.35(7)   |
| S(26)-Ag(28)-Ag(6)   | 87.90(7)   |
| S(9)-Ag(28)-Ag(6)    | 51.63(7)   |
| S(18)-Ag(28)-Ag(6)   | 134.77(7)  |
| Ag(10)-Ag(28)-Ag(6)  | 105.91(4)  |
| S(26)-Ag(28)-Au(2)   | 76.38(7)   |
| S(9)-Ag(28)-Au(2)    | 102.95(7)  |
| S(18)-Ag(28)-Au(2)   | 106.31(7)  |
| Ag(10)-Ag(28)-Au(2)  | 55.59(2)   |
| Ag(6)-Ag(28)-Au(2)   | 54.27(2)   |
| S(26)-Ag(28)-Ag(17)  | 139.40(7)  |
| S(9)-Ag(28)-Ag(17)   | 74.66(7)   |
| S(18)-Ag(28)-Ag(17)  | 65.49(7)   |
| Ag(10)-Ag(28)-Ag(17) | 60.42(3)   |
| Ag(6)-Ag(28)-Ag(17)  | 69.51(3)   |
| Au(2)-Ag(28)-Ag(17)  | 63.02(3)   |
| S(29)-Ag(29)-Au(13)  | 150.46(7)  |
| S(29)-Ag(29)-Au(16)  | 114.44(8)  |
| Au(13)-Ag(29)-Au(16) | 63.61(2)   |
| S(29)-Ag(29)-Au(3)   | 95.20(7)   |
| Au(13)-Ag(29)-Au(3)  | 58.18(2)   |
| Au(16)-Ag(29)-Au(3)  | 56.19(2)   |
| S(29)-Ag(29)-Ag(8)   | 95.67(7)   |

|                      |           |
|----------------------|-----------|
| Au(13)-Ag(29)-Ag(8)  | 58.88(3)  |
| Au(16)-Ag(29)-Ag(8)  | 103.61(3) |
| Au(3)-Ag(29)-Ag(8)   | 52.41(2)  |
| S(29)-Ag(29)-Ag(35)  | 106.82(7) |
| Au(13)-Ag(29)-Ag(35) | 102.57(3) |
| Au(16)-Ag(29)-Ag(35) | 97.71(3)  |
| Au(3)-Ag(29)-Ag(35)  | 151.71(4) |
| Ag(8)-Ag(29)-Ag(35)  | 138.99(4) |
| S(29)-Ag(29)-Ag(9)   | 144.70(8) |
| Au(13)-Ag(29)-Ag(9)  | 56.44(3)  |
| Au(16)-Ag(29)-Ag(9)  | 98.50(3)  |
| Au(3)-Ag(29)-Ag(9)   | 114.31(3) |
| Ag(8)-Ag(29)-Ag(9)   | 88.18(3)  |
| Ag(35)-Ag(29)-Ag(9)  | 53.95(3)  |
| S(29)-Ag(29)-Au(14)  | 150.52(7) |
| Au(13)-Ag(29)-Au(14) | 54.47(2)  |
| Au(16)-Ag(29)-Au(14) | 53.03(2)  |
| Au(3)-Ag(29)-Au(14)  | 96.24(3)  |
| Ag(8)-Ag(29)-Au(14)  | 112.79(3) |
| Ag(35)-Ag(29)-Au(14) | 56.10(2)  |
| Ag(9)-Ag(29)-Au(14)  | 48.60(2)  |
| S(29)-Ag(29)-Ag(40)  | 104.31(8) |
| Au(13)-Ag(29)-Ag(40) | 73.73(3)  |
| Au(16)-Ag(29)-Ag(40) | 137.17(4) |
| Au(3)-Ag(29)-Ag(40)  | 104.32(3) |
| Ag(8)-Ag(29)-Ag(40)  | 53.34(3)  |
| Ag(35)-Ag(29)-Ag(40) | 87.52(3)  |
| Ag(9)-Ag(29)-Ag(40)  | 51.52(3)  |
| Au(14)-Ag(29)-Ag(40) | 99.02(3)  |
| S(29)-Ag(29)-Au(23)  | 44.15(7)  |

|                      |            |
|----------------------|------------|
| Au(13)-Ag(29)-Au(23) | 106.32(3)  |
| Au(16)-Ag(29)-Au(23) | 98.93(3)   |
| Au(3)-Ag(29)-Au(23)  | 54.681(19) |
| Ag(8)-Ag(29)-Au(23)  | 58.31(2)   |
| Ag(35)-Ag(29)-Au(23) | 150.78(3)  |
| Ag(9)-Ag(29)-Au(23)  | 145.04(4)  |
| Au(14)-Ag(29)-Au(23) | 149.87(3)  |
| Ag(40)-Ag(29)-Au(23) | 96.29(3)   |
| S(27)-Ag(30)-S(5)    | 145.65(10) |
| S(27)-Ag(30)-Au(8)   | 133.22(7)  |
| S(5)-Ag(30)-Au(8)    | 79.73(7)   |
| S(27)-Ag(30)-Ag(5)   | 92.01(7)   |
| S(5)-Ag(30)-Ag(5)    | 101.53(7)  |
| Au(8)-Ag(30)-Ag(5)   | 58.23(3)   |
| S(27)-Ag(30)-S(31)   | 93.48(10)  |
| S(5)-Ag(30)-S(31)    | 95.56(10)  |
| Au(8)-Ag(30)-S(31)   | 90.92(6)   |
| Ag(5)-Ag(30)-S(31)   | 140.56(6)  |
| S(27)-Ag(30)-Au(6)   | 78.96(7)   |
| S(5)-Ag(30)-Au(6)    | 134.43(7)  |
| Au(8)-Ag(30)-Au(6)   | 54.72(2)   |
| Ag(5)-Ag(30)-Au(6)   | 55.42(3)   |
| S(31)-Ag(30)-Au(6)   | 87.49(6)   |
| S(27)-Ag(30)-Ag(38)  | 143.55(7)  |
| S(5)-Ag(30)-Ag(38)   | 55.51(7)   |
| Au(8)-Ag(30)-Ag(38)  | 57.98(2)   |
| Ag(5)-Ag(30)-Ag(38)  | 114.87(4)  |
| S(31)-Ag(30)-Ag(38)  | 50.09(6)   |
| Au(6)-Ag(30)-Ag(38)  | 95.88(3)   |
| S(27)-Ag(30)-Au(22)  | 136.52(7)  |

|                      |            |
|----------------------|------------|
| S(5)-Ag(30)-Au(22)   | 44.43(7)   |
| Au(8)-Ag(30)-Au(22)  | 58.78(2)   |
| Ag(5)-Ag(30)-Au(22)  | 57.11(3)   |
| S(31)-Ag(30)-Au(22)  | 129.97(6)  |
| Au(6)-Ag(30)-Au(22)  | 101.64(3)  |
| Ag(38)-Ag(30)-Au(22) | 79.93(3)   |
| S(27)-Ag(30)-Ag(33)  | 49.65(7)   |
| S(5)-Ag(30)-Ag(33)   | 151.02(7)  |
| Au(8)-Ag(30)-Ag(33)  | 98.28(3)   |
| Ag(5)-Ag(30)-Ag(33)  | 101.76(4)  |
| S(31)-Ag(30)-Ag(33)  | 55.46(7)   |
| Au(6)-Ag(30)-Ag(33)  | 52.49(2)   |
| Ag(38)-Ag(30)-Ag(33) | 98.71(4)   |
| Au(22)-Ag(30)-Ag(33) | 154.03(3)  |
| S(11)-Ag(31)-S(23)   | 169.55(11) |
| S(11)-Ag(31)-Ag(14)  | 123.34(8)  |
| S(23)-Ag(31)-Ag(14)  | 55.12(8)   |
| S(11)-Ag(31)-Ag(11)  | 54.95(7)   |
| S(23)-Ag(31)-Ag(11)  | 134.08(7)  |
| Ag(14)-Ag(31)-Ag(11) | 97.19(4)   |
| S(11)-Ag(31)-S(30)   | 106.33(10) |
| S(23)-Ag(31)-S(30)   | 83.63(10)  |
| Ag(14)-Ag(31)-S(30)  | 104.26(6)  |
| Ag(11)-Ag(31)-S(30)  | 67.51(6)   |
| S(11)-Ag(31)-Ag(16)  | 64.36(8)   |
| S(23)-Ag(31)-Ag(16)  | 113.30(8)  |
| Ag(14)-Ag(31)-Ag(16) | 59.00(3)   |
| Ag(11)-Ag(31)-Ag(16) | 61.91(3)   |
| S(30)-Ag(31)-Ag(16)  | 122.43(6)  |
| S(26)-Ag(32)-S(7)    | 143.36(10) |

|                      |            |
|----------------------|------------|
| S(26)-Ag(32)-Au(10)  | 136.97(7)  |
| S(7)-Ag(32)-Au(10)   | 79.25(7)   |
| S(26)-Ag(32)-Ag(10)  | 97.61(7)   |
| S(7)-Ag(32)-Ag(10)   | 100.61(7)  |
| Au(10)-Ag(32)-Ag(10) | 57.79(3)   |
| S(26)-Ag(32)-Au(2)   | 80.77(7)   |
| S(7)-Ag(32)-Au(2)    | 135.64(7)  |
| Au(10)-Ag(32)-Au(2)  | 56.39(2)   |
| Ag(10)-Ag(32)-Au(2)  | 57.39(2)   |
| S(26)-Ag(32)-Ag(38)  | 52.35(8)   |
| S(7)-Ag(32)-Ag(38)   | 143.81(8)  |
| Au(10)-Ag(32)-Ag(38) | 99.51(3)   |
| Ag(10)-Ag(32)-Ag(38) | 109.24(4)  |
| Au(2)-Ag(32)-Ag(38)  | 55.67(2)   |
| S(26)-Ag(32)-Au(21)  | 140.72(8)  |
| S(7)-Ag(32)-Au(21)   | 44.21(7)   |
| Au(10)-Ag(32)-Au(21) | 57.56(2)   |
| Ag(10)-Ag(32)-Au(21) | 56.39(2)   |
| Au(2)-Ag(32)-Au(21)  | 102.91(3)  |
| Ag(38)-Ag(32)-Au(21) | 156.57(4)  |
| S(27)-Ag(33)-S(13)   | 130.16(10) |
| S(27)-Ag(33)-Au(6)   | 82.75(7)   |
| S(13)-Ag(33)-Au(6)   | 134.49(7)  |
| S(27)-Ag(33)-S(31)   | 93.33(10)  |
| S(13)-Ag(33)-S(31)   | 112.10(10) |
| Au(6)-Ag(33)-S(31)   | 92.77(6)   |
| S(27)-Ag(33)-Au(3)   | 136.68(7)  |
| S(13)-Ag(33)-Au(3)   | 79.79(7)   |
| Au(6)-Ag(33)-Au(3)   | 57.07(2)   |
| S(31)-Ag(33)-Au(3)   | 103.23(6)  |



|                      |            |
|----------------------|------------|
| S(27)-Ag(33)-Ag(8)   | 91.65(7)   |
| S(13)-Ag(33)-Ag(8)   | 88.26(7)   |
| Au(6)-Ag(33)-Ag(8)   | 56.25(3)   |
| S(31)-Ag(33)-Ag(8)   | 147.67(6)  |
| Au(3)-Ag(33)-Ag(8)   | 54.22(2)   |
| S(27)-Ag(33)-Ag(46)  | 122.66(8)  |
| S(13)-Ag(33)-Ag(46)  | 104.42(7)  |
| Au(6)-Ag(33)-Ag(46)  | 67.31(3)   |
| S(31)-Ag(33)-Ag(46)  | 44.17(6)   |
| Au(3)-Ag(33)-Ag(46)  | 59.17(3)   |
| Ag(8)-Ag(33)-Ag(46)  | 108.05(3)  |
| S(27)-Ag(33)-Ag(30)  | 48.28(8)   |
| S(13)-Ag(33)-Ag(30)  | 165.28(7)  |
| Au(6)-Ag(33)-Ag(30)  | 59.17(3)   |
| S(31)-Ag(33)-Ag(30)  | 56.59(6)   |
| Au(3)-Ag(33)-Ag(30)  | 110.90(3)  |
| Ag(8)-Ag(33)-Ag(30)  | 106.15(4)  |
| Ag(46)-Ag(33)-Ag(30) | 74.42(3)   |
| S(9)-Ag(34)-S(16)    | 171.30(11) |
| S(9)-Ag(34)-Ag(2)    | 132.23(7)  |
| S(16)-Ag(34)-Ag(2)   | 55.82(7)   |
| S(9)-Ag(34)-Ag(6)    | 53.75(7)   |
| S(16)-Ag(34)-Ag(6)   | 126.02(7)  |
| Ag(2)-Ag(34)-Ag(6)   | 98.26(4)   |
| S(9)-Ag(34)-S(14)    | 84.06(10)  |
| S(16)-Ag(34)-S(14)   | 103.63(10) |
| Ag(2)-Ag(34)-S(14)   | 66.83(6)   |
| Ag(6)-Ag(34)-S(14)   | 106.81(6)  |
| S(9)-Ag(34)-Ag(19)   | 114.87(7)  |
| S(16)-Ag(34)-Ag(19)  | 64.79(7)   |

|                      |            |
|----------------------|------------|
| Ag(2)-Ag(34)-Ag(19)  | 59.75(3)   |
| Ag(6)-Ag(34)-Ag(19)  | 61.38(3)   |
| S(14)-Ag(34)-Ag(19)  | 121.30(5)  |
| S(28)-Ag(35)-S(15)   | 129.23(11) |
| S(28)-Ag(35)-S(21)   | 116.25(11) |
| S(15)-Ag(35)-S(21)   | 112.90(10) |
| S(28)-Ag(35)-Ag(13)  | 97.83(8)   |
| S(15)-Ag(35)-Ag(13)  | 53.73(7)   |
| S(21)-Ag(35)-Ag(13)  | 133.14(7)  |
| S(28)-Ag(35)-Ag(9)   | 84.95(7)   |
| S(15)-Ag(35)-Ag(9)   | 138.21(7)  |
| S(21)-Ag(35)-Ag(9)   | 51.53(7)   |
| Ag(13)-Ag(35)-Ag(9)  | 105.11(4)  |
| S(28)-Ag(35)-Au(14)  | 76.87(7)   |
| S(15)-Ag(35)-Au(14)  | 106.13(7)  |
| S(21)-Ag(35)-Au(14)  | 100.56(7)  |
| Ag(13)-Ag(35)-Au(14) | 55.22(3)   |
| Ag(9)-Ag(35)-Au(14)  | 53.01(2)   |
| S(28)-Ag(35)-Ag(29)  | 137.95(7)  |
| S(15)-Ag(35)-Ag(29)  | 74.97(7)   |
| S(21)-Ag(35)-Ag(29)  | 65.51(7)   |
| Ag(13)-Ag(35)-Ag(29) | 67.64(3)   |
| Ag(9)-Ag(35)-Ag(29)  | 63.29(3)   |
| Au(14)-Ag(35)-Ag(29) | 62.29(3)   |
| S(15)-Ag(36)-S(12)   | 170.58(11) |
| S(15)-Ag(36)-Ag(4)   | 131.66(7)  |
| S(12)-Ag(36)-Ag(4)   | 56.91(8)   |
| S(15)-Ag(36)-Ag(13)  | 55.46(7)   |
| S(12)-Ag(36)-Ag(13)  | 124.20(7)  |
| Ag(4)-Ag(36)-Ag(13)  | 95.50(4)   |

|                     |            |
|---------------------|------------|
| S(18)-Ag(37)-S(10)  | 169.47(11) |
| S(18)-Ag(37)-S(3)   | 105.25(10) |
| S(10)-Ag(37)-S(3)   | 85.22(10)  |
| S(18)-Ag(37)-Ag(10) | 55.85(7)   |
| S(10)-Ag(37)-Ag(10) | 131.52(7)  |
| S(3)-Ag(37)-Ag(10)  | 67.98(6)   |
| S(18)-Ag(37)-Ag(7)  | 121.99(8)  |
| S(10)-Ag(37)-Ag(7)  | 54.48(7)   |
| S(3)-Ag(37)-Ag(7)   | 105.04(6)  |
| Ag(10)-Ag(37)-Ag(7) | 93.32(3)   |
| S(26)-Ag(38)-S(31)  | 130.63(10) |
| S(26)-Ag(38)-S(5)   | 113.05(10) |
| S(31)-Ag(38)-S(5)   | 98.18(10)  |
| S(26)-Ag(38)-Au(2)  | 81.14(7)   |
| S(31)-Ag(38)-Au(2)  | 113.67(7)  |
| S(5)-Ag(38)-Au(2)   | 122.50(6)  |
| S(26)-Ag(38)-Au(8)  | 128.43(7)  |
| S(31)-Ag(38)-Au(8)  | 95.44(7)   |
| S(5)-Ag(38)-Au(8)   | 74.52(6)   |
| Au(2)-Ag(38)-Au(8)  | 56.66(2)   |
| S(26)-Ag(38)-Ag(46) | 120.45(7)  |
| S(31)-Ag(38)-Ag(46) | 47.57(7)   |
| S(5)-Ag(38)-Ag(46)  | 126.42(7)  |
| Au(2)-Ag(38)-Ag(46) | 66.13(3)   |
| Au(8)-Ag(38)-Ag(46) | 70.91(3)   |
| S(26)-Ag(38)-Ag(32) | 50.19(7)   |
| S(31)-Ag(38)-Ag(32) | 96.25(7)   |
| S(5)-Ag(38)-Ag(32)  | 163.08(7)  |
| Au(2)-Ag(38)-Ag(32) | 58.16(2)   |
| Au(8)-Ag(38)-Ag(32) | 112.87(3)  |

|                      |            |
|----------------------|------------|
| Ag(46)-Ag(38)-Ag(32) | 70.27(3)   |
| S(26)-Ag(38)-Ag(30)  | 162.10(7)  |
| S(31)-Ag(38)-Ag(30)  | 59.46(7)   |
| S(5)-Ag(38)-Ag(30)   | 49.17(7)   |
| Au(2)-Ag(38)-Ag(30)  | 109.41(3)  |
| Au(8)-Ag(38)-Ag(30)  | 54.98(2)   |
| Ag(46)-Ag(38)-Ag(30) | 77.42(3)   |
| Ag(32)-Ag(38)-Ag(30) | 147.67(4)  |
| S(26)-Ag(38)-Ag(6)   | 81.61(7)   |
| S(31)-Ag(38)-Ag(6)   | 145.94(7)  |
| S(5)-Ag(38)-Ag(6)    | 73.20(7)   |
| Au(2)-Ag(38)-Ag(6)   | 53.34(2)   |
| Au(8)-Ag(38)-Ag(6)   | 50.56(2)   |
| Ag(46)-Ag(38)-Ag(6)  | 110.99(3)  |
| Ag(32)-Ag(38)-Ag(6)  | 99.29(3)   |
| Ag(30)-Ag(38)-Ag(6)  | 93.08(3)   |
| S(28)-Ag(39)-S(19)   | 133.38(11) |
| S(28)-Ag(39)-S(32)   | 95.32(10)  |
| S(19)-Ag(39)-S(32)   | 109.46(10) |
| S(28)-Ag(39)-Au(11)  | 133.41(7)  |
| S(19)-Ag(39)-Au(11)  | 80.36(7)   |
| S(32)-Ag(39)-Au(11)  | 101.62(6)  |
| S(28)-Ag(39)-Au(14)  | 80.57(7)   |
| S(19)-Ag(39)-Au(14)  | 135.54(7)  |
| S(32)-Ag(39)-Au(14)  | 90.62(6)   |
| Au(11)-Ag(39)-Au(14) | 56.43(2)   |
| S(28)-Ag(39)-Ag(9)   | 85.25(8)   |
| S(19)-Ag(39)-Ag(9)   | 94.60(7)   |
| S(32)-Ag(39)-Ag(9)   | 145.03(6)  |
| Au(11)-Ag(39)-Ag(9)  | 56.79(3)   |

|                      |            |
|----------------------|------------|
| Au(14)-Ag(39)-Ag(9)  | 54.87(2)   |
| S(28)-Ag(39)-Ag(42)  | 52.30(8)   |
| S(19)-Ag(39)-Ag(42)  | 163.52(7)  |
| S(32)-Ag(39)-Ag(42)  | 54.68(7)   |
| Au(11)-Ag(39)-Ag(42) | 105.87(3)  |
| Au(14)-Ag(39)-Ag(42) | 55.59(2)   |
| Ag(9)-Ag(39)-Ag(42)  | 101.57(3)  |
| S(28)-Ag(39)-Ag(45)  | 167.41(8)  |
| S(19)-Ag(39)-Ag(45)  | 50.37(7)   |
| S(32)-Ag(39)-Ag(45)  | 72.99(7)   |
| Au(11)-Ag(39)-Ag(45) | 55.74(2)   |
| Au(14)-Ag(39)-Ag(45) | 103.73(3)  |
| Ag(9)-Ag(39)-Ag(45)  | 106.96(4)  |
| Ag(42)-Ag(39)-Ag(45) | 120.31(4)  |
| S(21)-Ag(40)-S(1)    | 168.20(11) |
| S(21)-Ag(40)-Ag(9)   | 54.71(8)   |
| S(1)-Ag(40)-Ag(9)    | 136.64(7)  |
| S(21)-Ag(40)-Ag(8)   | 125.90(8)  |
| S(1)-Ag(40)-Ag(8)    | 54.68(7)   |
| Ag(9)-Ag(40)-Ag(8)   | 100.92(4)  |
| S(21)-Ag(40)-S(17)   | 103.77(10) |
| S(1)-Ag(40)-S(17)    | 85.98(10)  |
| Ag(9)-Ag(40)-S(17)   | 67.78(6)   |
| Ag(8)-Ag(40)-S(17)   | 109.09(6)  |
| S(21)-Ag(40)-Ag(29)  | 66.75(8)   |
| S(1)-Ag(40)-Ag(29)   | 113.19(7)  |
| Ag(9)-Ag(40)-Ag(29)  | 63.61(3)   |
| Ag(8)-Ag(40)-Ag(29)  | 59.25(3)   |
| S(17)-Ag(40)-Ag(29)  | 125.14(6)  |
| S(8)-Ag(41)-S(7)     | 136.79(10) |

|                      |            |
|----------------------|------------|
| S(8)-Ag(41)-Au(5)    | 84.44(7)   |
| S(7)-Ag(41)-Au(5)    | 135.40(7)  |
| S(8)-Ag(41)-Au(10)   | 140.66(7)  |
| S(7)-Ag(41)-Au(10)   | 78.90(7)   |
| Au(5)-Ag(41)-Au(10)  | 57.09(2)   |
| S(8)-Ag(41)-Ag(14)   | 98.85(8)   |
| S(7)-Ag(41)-Ag(14)   | 92.71(7)   |
| Au(5)-Ag(41)-Ag(14)  | 58.23(3)   |
| Au(10)-Ag(41)-Ag(14) | 55.89(3)   |
| S(8)-Ag(41)-Ag(46)   | 106.48(7)  |
| S(7)-Ag(41)-Ag(46)   | 109.77(7)  |
| Au(5)-Ag(41)-Ag(46)  | 57.46(2)   |
| Au(10)-Ag(41)-Ag(46) | 61.63(2)   |
| Ag(14)-Ag(41)-Ag(46) | 106.54(3)  |
| S(8)-Ag(41)-Ag(23)   | 48.22(7)   |
| S(7)-Ag(41)-Ag(23)   | 158.73(7)  |
| Au(5)-Ag(41)-Ag(23)  | 56.42(2)   |
| Au(10)-Ag(41)-Ag(23) | 106.32(3)  |
| Ag(14)-Ag(41)-Ag(23) | 107.37(4)  |
| Ag(46)-Ag(41)-Ag(23) | 58.43(3)   |
| S(25)-Ag(42)-S(28)   | 136.03(10) |
| S(25)-Ag(42)-S(32)   | 105.04(10) |
| S(28)-Ag(42)-S(32)   | 96.67(10)  |
| S(25)-Ag(42)-Au(14)  | 132.19(7)  |
| S(28)-Ag(42)-Au(14)  | 81.97(7)   |
| S(32)-Ag(42)-Au(14)  | 94.86(6)   |
| S(25)-Ag(42)-Au(12)  | 77.47(7)   |
| S(28)-Ag(42)-Au(12)  | 136.06(7)  |
| S(32)-Ag(42)-Au(12)  | 99.70(7)   |
| Au(14)-Ag(42)-Au(12) | 56.30(2)   |

|                      |           |
|----------------------|-----------|
| S(25)-Ag(42)-Ag(13)  | 88.05(7)  |
| S(28)-Ag(42)-Ag(13)  | 93.40(7)  |
| S(32)-Ag(42)-Ag(13)  | 147.88(6) |
| Au(14)-Ag(42)-Ag(13) | 56.48(3)  |
| Au(12)-Ag(42)-Ag(13) | 53.94(2)  |
| S(25)-Ag(42)-Ag(39)  | 162.18(8) |
| S(28)-Ag(42)-Ag(39)  | 51.05(7)  |
| S(32)-Ag(42)-Ag(39)  | 57.55(7)  |
| Au(14)-Ag(42)-Ag(39) | 58.86(3)  |
| Au(12)-Ag(42)-Ag(39) | 107.47(3) |
| Ag(13)-Ag(42)-Ag(39) | 108.83(4) |
| S(25)-Ag(42)-Ag(44)  | 53.06(8)  |
| S(28)-Ag(42)-Ag(44)  | 160.61(7) |
| S(32)-Ag(42)-Ag(44)  | 64.26(7)  |
| Au(14)-Ag(42)-Ag(44) | 102.22(3) |
| Au(12)-Ag(42)-Ag(44) | 56.03(3)  |
| Ag(13)-Ag(42)-Ag(44) | 104.75(4) |
| Ag(39)-Ag(42)-Ag(44) | 114.84(4) |
| S(32)-Ag(43)-Ag(3)   | 140.72(8) |
| S(32)-Ag(43)-Au(4)   | 139.40(8) |
| Ag(3)-Ag(43)-Au(4)   | 62.16(3)  |
| S(32)-Ag(43)-Au(9)   | 152.11(8) |
| Ag(3)-Ag(43)-Au(9)   | 63.74(3)  |
| Au(4)-Ag(43)-Au(9)   | 54.85(2)  |
| S(32)-Ag(43)-Ag(45)  | 83.50(8)  |
| Ag(3)-Ag(43)-Ag(45)  | 107.02(4) |
| Au(4)-Ag(43)-Ag(45)  | 55.93(3)  |
| Au(9)-Ag(43)-Ag(45)  | 103.31(3) |
| S(32)-Ag(43)-Au(1)   | 120.68(8) |
| Ag(3)-Ag(43)-Au(1)   | 58.47(3)  |

|                      |           |
|----------------------|-----------|
| Au(4)-Ag(43)-Au(1)   | 99.86(3)  |
| Au(9)-Ag(43)-Au(1)   | 53.14(2)  |
| Ag(45)-Ag(43)-Au(1)  | 155.29(4) |
| S(32)-Ag(43)-Au(11)  | 104.27(8) |
| Ag(3)-Ag(43)-Au(11)  | 58.77(3)  |
| Au(4)-Ag(43)-Au(11)  | 53.26(2)  |
| Au(9)-Ag(43)-Au(11)  | 101.61(3) |
| Ag(45)-Ag(43)-Au(11) | 54.97(2)  |
| Au(1)-Ag(43)-Au(11)  | 117.03(3) |
| S(32)-Ag(43)-Ag(21)  | 108.93(8) |
| Ag(3)-Ag(43)-Ag(21)  | 109.44(4) |
| Au(4)-Ag(43)-Ag(21)  | 56.45(3)  |
| Au(9)-Ag(43)-Ag(21)  | 54.40(2)  |
| Ag(45)-Ag(43)-Ag(21) | 62.67(3)  |
| Au(1)-Ag(43)-Ag(21)  | 101.32(3) |
| Au(11)-Ag(43)-Ag(21) | 103.04(3) |
| S(32)-Ag(43)-Ag(44)  | 66.59(8)  |
| Ag(3)-Ag(43)-Ag(44)  | 100.34(4) |
| Au(4)-Ag(43)-Ag(44)  | 153.78(4) |
| Au(9)-Ag(43)-Ag(44)  | 100.74(3) |
| Ag(45)-Ag(43)-Ag(44) | 149.47(4) |
| Au(1)-Ag(43)-Ag(44)  | 54.09(2)  |
| Au(11)-Ag(43)-Ag(44) | 136.60(4) |
| Ag(21)-Ag(43)-Ag(44) | 120.21(4) |
| S(32)-Ag(43)-Ag(27)  | 98.67(8)  |
| Ag(3)-Ag(43)-Ag(27)  | 105.04(4) |
| Au(4)-Ag(43)-Ag(27)  | 105.29(3) |
| Au(9)-Ag(43)-Ag(27)  | 54.99(2)  |
| Ag(45)-Ag(43)-Ag(27) | 124.51(4) |
| Au(1)-Ag(43)-Ag(27)  | 51.89(2)  |



|                      |            |
|----------------------|------------|
| Au(11)-Ag(43)-Ag(27) | 156.60(4)  |
| Ag(21)-Ag(43)-Ag(27) | 64.45(3)   |
| Ag(44)-Ag(43)-Ag(27) | 58.19(3)   |
| S(22)-Ag(44)-S(25)   | 128.09(10) |
| S(22)-Ag(44)-Au(12)  | 132.37(7)  |
| S(25)-Ag(44)-Au(12)  | 76.72(7)   |
| S(22)-Ag(44)-Au(1)   | 81.62(7)   |
| S(25)-Ag(44)-Au(1)   | 131.28(7)  |
| Au(12)-Ag(44)-Au(1)  | 56.98(2)   |
| S(22)-Ag(44)-Ag(11)  | 83.15(7)   |
| S(25)-Ag(44)-Ag(11)  | 88.58(7)   |
| Au(12)-Ag(44)-Ag(11) | 54.58(2)   |
| Au(1)-Ag(44)-Ag(11)  | 53.78(2)   |
| S(22)-Ag(44)-Ag(42)  | 169.57(7)  |
| S(25)-Ag(44)-Ag(42)  | 49.29(7)   |
| Au(12)-Ag(44)-Ag(42) | 58.06(3)   |
| Au(1)-Ag(44)-Ag(42)  | 107.50(3)  |
| Ag(11)-Ag(44)-Ag(42) | 106.20(4)  |
| S(22)-Ag(44)-Ag(27)  | 50.06(8)   |
| S(25)-Ag(44)-Ag(27)  | 173.86(7)  |
| Au(12)-Ag(44)-Ag(27) | 108.87(3)  |
| Au(1)-Ag(44)-Ag(27)  | 54.83(3)   |
| Ag(11)-Ag(44)-Ag(27) | 96.76(4)   |
| Ag(42)-Ag(44)-Ag(27) | 131.14(4)  |
| S(22)-Ag(44)-Ag(43)  | 111.70(8)  |
| S(25)-Ag(44)-Ag(43)  | 119.37(7)  |
| Au(12)-Ag(44)-Ag(43) | 69.86(3)   |
| Au(1)-Ag(44)-Ag(43)  | 60.59(2)   |
| Ag(11)-Ag(44)-Ag(43) | 109.14(3)  |
| Ag(42)-Ag(44)-Ag(43) | 70.09(3)   |

|                      |           |
|----------------------|-----------|
| Ag(27)-Ag(44)-Ag(43) | 61.71(3)  |
| S(20)-Ag(45)-S(19)   | 131.76(9) |
| S(20)-Ag(45)-Au(4)   | 84.98(7)  |
| S(19)-Ag(45)-Au(4)   | 134.75(7) |
| S(20)-Ag(45)-Au(11)  | 140.40(7) |
| S(19)-Ag(45)-Au(11)  | 79.03(6)  |
| Au(4)-Ag(45)-Au(11)  | 57.46(2)  |
| S(20)-Ag(45)-Ag(12)  | 95.38(8)  |
| S(19)-Ag(45)-Ag(12)  | 89.31(7)  |
| Au(4)-Ag(45)-Ag(12)  | 57.33(3)  |
| Au(11)-Ag(45)-Ag(12) | 55.51(3)  |
| S(20)-Ag(45)-Ag(43)  | 108.52(7) |
| S(19)-Ag(45)-Ag(43)  | 115.46(7) |
| Au(4)-Ag(45)-Ag(43)  | 58.70(3)  |
| Au(11)-Ag(45)-Ag(43) | 64.55(3)  |
| Ag(12)-Ag(45)-Ag(43) | 108.02(3) |
| S(20)-Ag(45)-Ag(21)  | 48.14(7)  |
| S(19)-Ag(45)-Ag(21)  | 166.25(7) |
| Au(4)-Ag(45)-Ag(21)  | 56.38(3)  |
| Au(11)-Ag(45)-Ag(21) | 108.59(3) |
| Ag(12)-Ag(45)-Ag(21) | 104.43(4) |
| Ag(43)-Ag(45)-Ag(21) | 60.67(3)  |
| S(20)-Ag(45)-Ag(39)  | 162.02(8) |
| S(19)-Ag(45)-Ag(39)  | 49.42(7)  |
| Au(4)-Ag(45)-Ag(39)  | 104.75(3) |
| Au(11)-Ag(45)-Ag(39) | 54.62(2)  |
| Ag(12)-Ag(45)-Ag(39) | 102.60(4) |
| Ag(43)-Ag(45)-Ag(39) | 66.08(3)  |
| Ag(21)-Ag(45)-Ag(39) | 125.32(4) |
| S(31)-Ag(46)-Ag(1)   | 141.48(8) |

|                      |           |
|----------------------|-----------|
| S(31)-Ag(46)-Au(5)   | 151.40(8) |
| Ag(1)-Ag(46)-Au(5)   | 62.37(3)  |
| S(31)-Ag(46)-Au(3)   | 116.00(8) |
| Ag(1)-Ag(46)-Au(3)   | 60.78(3)  |
| Au(5)-Ag(46)-Au(3)   | 54.77(2)  |
| S(31)-Ag(46)-Ag(38)  | 56.35(8)  |
| Ag(1)-Ag(46)-Ag(38)  | 101.31(4) |
| Au(5)-Ag(46)-Ag(38)  | 149.09(4) |
| Au(3)-Ag(46)-Ag(38)  | 142.79(4) |
| S(31)-Ag(46)-Au(10)  | 141.62(8) |
| Ag(1)-Ag(46)-Au(10)  | 62.27(3)  |
| Au(5)-Ag(46)-Au(10)  | 53.75(2)  |
| Au(3)-Ag(46)-Au(10)  | 102.11(3) |
| Ag(38)-Ag(46)-Au(10) | 95.76(3)  |
| S(31)-Ag(46)-Ag(23)  | 94.56(8)  |
| Ag(1)-Ag(46)-Ag(23)  | 108.44(4) |
| Au(5)-Ag(46)-Ag(23)  | 57.43(3)  |
| Au(3)-Ag(46)-Ag(23)  | 54.62(2)  |
| Ag(38)-Ag(46)-Ag(23) | 149.37(4) |
| Au(10)-Ag(46)-Ag(23) | 104.27(3) |
| S(31)-Ag(46)-Ag(41)  | 109.60(8) |
| Ag(1)-Ag(46)-Ag(41)  | 108.37(4) |
| Au(5)-Ag(46)-Ag(41)  | 54.98(3)  |
| Au(3)-Ag(46)-Ag(41)  | 102.33(3) |
| Ag(38)-Ag(46)-Ag(41) | 114.59(4) |
| Au(10)-Ag(46)-Ag(41) | 54.64(2)  |
| Ag(23)-Ag(46)-Ag(41) | 62.69(3)  |
| S(31)-Ag(46)-Au(2)   | 109.72(8) |
| Ag(1)-Ag(46)-Au(2)   | 56.80(3)  |
| Au(5)-Ag(46)-Au(2)   | 97.38(3)  |

|                      |            |
|----------------------|------------|
| Au(3)-Ag(46)-Au(2)   | 117.46(3)  |
| Ag(38)-Ag(46)-Au(2)  | 53.39(2)   |
| Au(10)-Ag(46)-Au(2)  | 51.037(19) |
| Ag(23)-Ag(46)-Au(2)  | 154.28(4)  |
| Ag(41)-Ag(46)-Au(2)  | 99.91(3)   |
| S(31)-Ag(46)-Ag(33)  | 60.54(8)   |
| Ag(1)-Ag(46)-Ag(33)  | 101.93(4)  |
| Au(5)-Ag(46)-Ag(33)  | 105.84(3)  |
| Au(3)-Ag(46)-Ag(33)  | 55.59(2)   |
| Ag(38)-Ag(46)-Ag(33) | 103.14(3)  |
| Au(10)-Ag(46)-Ag(33) | 157.70(4)  |
| Ag(23)-Ag(46)-Ag(33) | 64.07(3)   |
| Ag(41)-Ag(46)-Ag(33) | 124.52(4)  |
| Au(2)-Ag(46)-Ag(33)  | 135.52(3)  |
| S(31)-Ag(46)-Au(6)   | 91.29(8)   |
| Ag(1)-Ag(46)-Au(6)   | 55.93(3)   |
| Au(5)-Ag(46)-Au(6)   | 97.85(3)   |
| Au(3)-Ag(46)-Au(6)   | 50.297(18) |
| Ag(38)-Ag(46)-Au(6)  | 92.49(3)   |
| Au(10)-Ag(46)-Au(6)  | 118.08(3)  |
| Ag(23)-Ag(46)-Au(6)  | 98.05(3)   |
| Ag(41)-Ag(46)-Au(6)  | 151.86(4)  |
| Au(2)-Ag(46)-Au(6)   | 89.98(2)   |
| Ag(33)-Ag(46)-Au(6)  | 50.12(2)   |
| Au(9)-Au(1)-Ag(11)   | 172.77(3)  |
| Au(9)-Au(1)-Au(12)   | 125.44(2)  |
| Ag(11)-Au(1)-Au(12)  | 60.73(2)   |
| Au(9)-Au(1)-Au(18)   | 61.402(16) |
| Ag(11)-Au(1)-Au(18)  | 113.50(3)  |
| Au(12)-Au(1)-Au(18)  | 114.28(2)  |

|                     |            |
|---------------------|------------|
| Au(9)-Au(1)-Au(17)  | 115.91(2)  |
| Ag(11)-Au(1)-Au(17) | 62.67(2)   |
| Au(12)-Au(1)-Au(17) | 60.025(17) |
| Au(18)-Au(1)-Au(17) | 61.839(16) |
| Au(9)-Au(1)-Ag(27)  | 63.51(2)   |
| Ag(11)-Au(1)-Ag(27) | 117.17(3)  |
| Au(12)-Au(1)-Ag(27) | 124.95(3)  |
| Au(18)-Au(1)-Ag(27) | 114.83(3)  |
| Au(17)-Au(1)-Ag(27) | 174.69(3)  |
| Au(9)-Au(1)-Ag(7)   | 58.69(2)   |
| Ag(11)-Au(1)-Ag(7)  | 114.73(3)  |
| Au(12)-Au(1)-Ag(7)  | 172.50(3)  |
| Au(18)-Au(1)-Ag(7)  | 61.06(2)   |
| Au(17)-Au(1)-Ag(7)  | 112.87(3)  |
| Ag(27)-Au(1)-Ag(7)  | 62.07(3)   |
| Au(9)-Au(1)-Ag(3)   | 65.36(2)   |
| Ag(11)-Au(1)-Ag(3)  | 118.58(3)  |
| Au(12)-Au(1)-Ag(3)  | 63.84(2)   |
| Au(18)-Au(1)-Ag(3)  | 68.52(2)   |
| Au(17)-Au(1)-Ag(3)  | 68.30(2)   |
| Ag(27)-Au(1)-Ag(3)  | 114.95(3)  |
| Ag(7)-Au(1)-Ag(3)   | 116.98(3)  |
| Au(9)-Au(1)-Ag(44)  | 117.45(3)  |
| Ag(11)-Au(1)-Ag(44) | 68.17(3)   |
| Au(12)-Au(1)-Ag(44) | 61.22(2)   |
| Au(18)-Au(1)-Ag(44) | 174.19(3)  |
| Au(17)-Au(1)-Ag(44) | 115.92(3)  |
| Ag(27)-Au(1)-Ag(44) | 67.82(3)   |
| Ag(7)-Au(1)-Ag(44)  | 123.83(3)  |
| Ag(3)-Au(1)-Ag(44)  | 105.71(3)  |

|                     |           |
|---------------------|-----------|
| Au(9)-Au(1)-Ag(18)  | 114.62(3) |
| Ag(11)-Au(1)-Ag(18) | 60.51(3)  |
| Au(12)-Au(1)-Ag(18) | 118.57(3) |
| Au(18)-Au(1)-Ag(18) | 103.86(3) |
| Au(17)-Au(1)-Ag(18) | 105.48(3) |
| Ag(27)-Au(1)-Ag(18) | 70.84(3)  |
| Ag(7)-Au(1)-Ag(18)  | 59.48(3)  |
| Ag(3)-Au(1)-Ag(18)  | 171.67(3) |
| Ag(44)-Au(1)-Ag(18) | 81.85(3)  |
| Au(9)-Au(1)-Ag(43)  | 61.28(2)  |
| Ag(11)-Au(1)-Ag(43) | 125.91(3) |
| Au(12)-Au(1)-Ag(43) | 73.46(2)  |
| Au(18)-Au(1)-Ag(43) | 110.42(2) |
| Au(17)-Au(1)-Ag(43) | 117.26(2) |
| Ag(27)-Au(1)-Ag(43) | 67.45(3)  |
| Ag(7)-Au(1)-Ag(43)  | 113.34(3) |
| Ag(3)-Au(1)-Ag(43)  | 53.89(2)  |
| Ag(44)-Au(1)-Ag(43) | 65.32(3)  |
| Ag(18)-Au(1)-Ag(43) | 134.04(3) |
| Au(9)-Au(1)-Ag(16)  | 109.24(2) |
| Ag(11)-Au(1)-Ag(16) | 64.01(3)  |
| Au(12)-Au(1)-Ag(16) | 105.55(2) |
| Au(18)-Au(1)-Ag(16) | 53.98(2)  |
| Au(17)-Au(1)-Ag(16) | 52.02(2)  |
| Ag(27)-Au(1)-Ag(16) | 122.78(3) |
| Ag(7)-Au(1)-Ag(16)  | 67.01(3)  |
| Ag(3)-Au(1)-Ag(16)  | 110.03(3) |
| Ag(44)-Au(1)-Ag(16) | 129.66(3) |
| Ag(18)-Au(1)-Ag(16) | 61.80(3)  |
| Ag(43)-Au(1)-Ag(16) | 163.08(3) |

|                     |            |
|---------------------|------------|
| Au(10)-Au(2)-Au(8)  | 125.49(2)  |
| Au(10)-Au(2)-Au(7)  | 115.54(2)  |
| Au(8)-Au(2)-Au(7)   | 60.884(16) |
| Au(10)-Au(2)-Ag(10) | 60.69(2)   |
| Au(8)-Au(2)-Ag(10)  | 170.31(3)  |
| Au(7)-Au(2)-Ag(10)  | 110.27(3)  |
| Au(10)-Au(2)-Ag(6)  | 175.50(3)  |
| Au(8)-Au(2)-Ag(6)   | 58.30(2)   |
| Au(7)-Au(2)-Ag(6)   | 63.41(2)   |
| Ag(10)-Au(2)-Ag(6)  | 115.21(3)  |
| Au(10)-Au(2)-Au(18) | 60.051(16) |
| Au(8)-Au(2)-Au(18)  | 114.51(2)  |
| Au(7)-Au(2)-Au(18)  | 62.040(16) |
| Ag(10)-Au(2)-Au(18) | 60.59(2)   |
| Ag(6)-Au(2)-Au(18)  | 116.80(3)  |
| Au(10)-Au(2)-Ag(38) | 111.27(3)  |
| Au(8)-Au(2)-Ag(38)  | 64.35(2)   |
| Au(7)-Au(2)-Ag(38)  | 121.71(3)  |
| Ag(10)-Au(2)-Ag(38) | 122.17(3)  |
| Ag(6)-Au(2)-Ag(38)  | 72.23(3)   |
| Au(18)-Au(2)-Ag(38) | 169.36(3)  |
| Au(10)-Au(2)-Ag(1)  | 65.72(2)   |
| Au(8)-Au(2)-Ag(1)   | 63.56(2)   |
| Au(7)-Au(2)-Ag(1)   | 68.37(2)   |
| Ag(10)-Au(2)-Ag(1)  | 118.36(3)  |
| Ag(6)-Au(2)-Ag(1)   | 116.72(3)  |
| Au(18)-Au(2)-Ag(1)  | 67.79(2)   |
| Ag(38)-Au(2)-Ag(1)  | 103.58(3)  |
| Au(10)-Au(2)-Ag(32) | 61.29(2)   |
| Au(8)-Au(2)-Ag(32)  | 127.83(3)  |

|                     |           |
|---------------------|-----------|
| Au(7)-Au(2)-Ag(32)  | 171.26(3) |
| Ag(10)-Au(2)-Ag(32) | 60.98(3)  |
| Ag(6)-Au(2)-Ag(32)  | 119.04(3) |
| Au(18)-Au(2)-Ag(32) | 110.98(2) |
| Ag(38)-Au(2)-Ag(32) | 66.17(3)  |
| Ag(1)-Au(2)-Ag(32)  | 114.93(3) |
| Au(10)-Au(2)-Ag(28) | 115.22(2) |
| Au(8)-Au(2)-Ag(28)  | 118.15(3) |
| Au(7)-Au(2)-Ag(28)  | 103.88(3) |
| Ag(10)-Au(2)-Ag(28) | 58.26(3)  |
| Ag(6)-Au(2)-Ag(28)  | 61.70(3)  |
| Au(18)-Au(2)-Ag(28) | 104.13(3) |
| Ag(38)-Au(2)-Ag(28) | 84.97(3)  |
| Ag(1)-Au(2)-Ag(28)  | 170.57(3) |
| Ag(32)-Au(2)-Ag(28) | 71.96(3)  |
| Au(10)-Au(2)-Ag(46) | 62.68(2)  |
| Au(8)-Au(2)-Ag(46)  | 71.29(2)  |
| Au(7)-Au(2)-Ag(46)  | 115.58(2) |
| Ag(10)-Au(2)-Ag(46) | 117.79(3) |
| Ag(6)-Au(2)-Ag(46)  | 121.81(3) |
| Au(18)-Au(2)-Ag(46) | 108.90(2) |
| Ag(38)-Au(2)-Ag(46) | 60.48(3)  |
| Ag(1)-Au(2)-Ag(46)  | 52.32(2)  |
| Ag(32)-Au(2)-Ag(46) | 70.95(3)  |
| Ag(28)-Au(2)-Ag(46) | 136.98(3) |
| Au(10)-Au(2)-Ag(17) | 104.41(2) |
| Au(8)-Au(2)-Ag(17)  | 109.96(2) |
| Au(7)-Au(2)-Ag(17)  | 54.14(2)  |
| Ag(10)-Au(2)-Ag(17) | 60.35(3)  |
| Ag(6)-Au(2)-Ag(17)  | 71.33(3)  |



|                     |            |
|---------------------|------------|
| Au(18)-Au(2)-Ag(17) | 51.84(2)   |
| Ag(38)-Au(2)-Ag(17) | 138.80(3)  |
| Ag(1)-Au(2)-Ag(17)  | 109.51(3)  |
| Ag(32)-Au(2)-Ag(17) | 117.75(3)  |
| Ag(28)-Au(2)-Ag(17) | 61.05(3)   |
| Ag(46)-Au(2)-Ag(17) | 160.12(3)  |
| Ag(8)-Au(3)-Au(6)   | 60.79(2)   |
| Ag(8)-Au(3)-Au(5)   | 175.32(3)  |
| Au(6)-Au(3)-Au(5)   | 119.18(2)  |
| Ag(8)-Au(3)-Au(16)  | 114.88(3)  |
| Au(6)-Au(3)-Au(16)  | 112.88(2)  |
| Au(5)-Au(3)-Au(16)  | 60.556(17) |
| Ag(8)-Au(3)-Ag(4)   | 120.61(3)  |
| Au(6)-Au(3)-Ag(4)   | 173.95(3)  |
| Au(5)-Au(3)-Ag(4)   | 58.87(2)   |
| Au(16)-Au(3)-Ag(4)  | 61.08(2)   |
| Ag(8)-Au(3)-Au(13)  | 62.27(2)   |
| Au(6)-Au(3)-Au(13)  | 59.548(16) |
| Au(5)-Au(3)-Au(13)  | 113.38(2)  |
| Au(16)-Au(3)-Au(13) | 62.287(16) |
| Ag(4)-Au(3)-Au(13)  | 115.27(3)  |
| Ag(8)-Au(3)-Ag(23)  | 121.35(3)  |
| Au(6)-Au(3)-Ag(23)  | 123.42(3)  |
| Au(5)-Au(3)-Ag(23)  | 62.93(2)   |
| Au(16)-Au(3)-Ag(23) | 113.63(3)  |
| Ag(4)-Au(3)-Ag(23)  | 61.58(3)   |
| Au(13)-Au(3)-Ag(23) | 175.88(3)  |
| Ag(8)-Au(3)-Ag(1)   | 116.52(3)  |
| Au(6)-Au(3)-Ag(1)   | 61.44(2)   |
| Au(5)-Au(3)-Ag(1)   | 61.51(2)   |

|                     |           |
|---------------------|-----------|
| Au(16)-Au(3)-Ag(1)  | 67.75(2)  |
| Ag(4)-Au(3)-Ag(1)   | 114.38(3) |
| Au(13)-Au(3)-Ag(1)  | 67.49(2)  |
| Ag(23)-Au(3)-Ag(1)  | 110.92(3) |
| Ag(8)-Au(3)-Ag(33)  | 65.22(3)  |
| Au(6)-Au(3)-Ag(33)  | 58.85(2)  |
| Au(5)-Au(3)-Ag(33)  | 119.09(3) |
| Au(16)-Au(3)-Ag(33) | 171.06(3) |
| Ag(4)-Au(3)-Ag(33)  | 127.20(3) |
| Au(13)-Au(3)-Ag(33) | 112.24(3) |
| Ag(23)-Au(3)-Ag(33) | 71.73(3)  |
| Ag(1)-Au(3)-Ag(33)  | 103.89(3) |
| Ag(8)-Au(3)-Au(23)  | 67.10(2)  |
| Au(6)-Au(3)-Au(23)  | 122.59(2) |
| Au(5)-Au(3)-Au(23)  | 114.74(2) |
| Au(16)-Au(3)-Au(23) | 109.40(2) |
| Ag(4)-Au(3)-Au(23)  | 61.61(2)  |
| Au(13)-Au(3)-Au(23) | 114.08(2) |
| Ag(23)-Au(3)-Au(23) | 67.25(2)  |
| Ag(1)-Au(3)-Au(23)  | 175.97(3) |
| Ag(33)-Au(3)-Au(23) | 79.10(2)  |
| Ag(8)-Au(3)-Ag(46)  | 123.07(3) |
| Au(6)-Au(3)-Ag(46)  | 70.59(2)  |
| Au(5)-Au(3)-Ag(46)  | 59.76(2)  |
| Au(16)-Au(3)-Ag(46) | 109.85(2) |
| Ag(4)-Au(3)-Ag(46)  | 110.93(3) |
| Au(13)-Au(3)-Ag(46) | 115.56(3) |
| Ag(23)-Au(3)-Ag(46) | 64.66(3)  |
| Ag(1)-Au(3)-Ag(46)  | 53.50(2)  |
| Ag(33)-Au(3)-Ag(46) | 65.24(3)  |

|                     |             |
|---------------------|-------------|
| Au(23)-Au(3)-Ag(46) | 126.66(2)   |
| Ag(8)-Au(3)-Ag(29)  | 64.30(3)    |
| Au(6)-Au(3)-Ag(29)  | 107.18(2)   |
| Au(5)-Au(3)-Ag(29)  | 112.05(3)   |
| Au(16)-Au(3)-Ag(29) | 56.81(2)    |
| Ag(4)-Au(3)-Ag(29)  | 69.78(3)    |
| Au(13)-Au(3)-Ag(29) | 54.27(2)    |
| Ag(23)-Au(3)-Ag(29) | 124.58(3)   |
| Ag(1)-Au(3)-Ag(29)  | 112.16(3)   |
| Ag(33)-Au(3)-Ag(29) | 126.94(3)   |
| Au(23)-Au(3)-Ag(29) | 67.34(2)    |
| Ag(46)-Au(3)-Ag(29) | 165.20(3)   |
| Au(9)-Au(4)-Au(11)  | 123.05(2)   |
| Au(9)-Au(4)-Au(15)  | 115.711(19) |
| Au(11)-Au(4)-Au(15) | 61.511(18)  |
| Au(9)-Au(4)-Ag(2)   | 61.31(2)    |
| Au(11)-Au(4)-Ag(2)  | 173.09(3)   |
| Au(15)-Au(4)-Ag(2)  | 112.14(3)   |
| Au(9)-Au(4)-Ag(12)  | 176.08(3)   |
| Au(11)-Au(4)-Ag(12) | 59.42(2)    |
| Au(15)-Au(4)-Ag(12) | 62.18(2)    |
| Ag(2)-Au(4)-Ag(12)  | 115.92(3)   |
| Au(9)-Au(4)-Ag(45)  | 119.22(3)   |
| Au(11)-Au(4)-Ag(45) | 62.95(2)    |
| Au(15)-Au(4)-Ag(45) | 116.36(3)   |
| Ag(2)-Au(4)-Ag(45)  | 120.73(3)   |
| Ag(12)-Au(4)-Ag(45) | 64.39(3)    |
| Au(9)-Au(4)-Au(7)   | 60.641(16)  |
| Au(11)-Au(4)-Au(7)  | 115.32(2)   |
| Au(15)-Au(4)-Au(7)  | 62.694(16)  |

|                     |           |
|---------------------|-----------|
| Ag(2)-Au(4)-Au(7)   | 61.10(2)  |
| Ag(12)-Au(4)-Au(7)  | 115.80(3) |
| Ag(45)-Au(4)-Au(7)  | 178.03(3) |
| Au(9)-Au(4)-Ag(43)  | 64.33(2)  |
| Au(11)-Au(4)-Ag(43) | 68.99(2)  |
| Au(15)-Au(4)-Ag(43) | 117.33(3) |
| Ag(2)-Au(4)-Ag(43)  | 117.63(3) |
| Ag(12)-Au(4)-Ag(43) | 119.47(3) |
| Ag(45)-Au(4)-Ag(43) | 65.37(3)  |
| Au(7)-Au(4)-Ag(43)  | 113.32(2) |
| Au(9)-Au(4)-Ag(3)   | 65.01(2)  |
| Au(11)-Au(4)-Ag(3)  | 62.48(2)  |
| Au(15)-Au(4)-Ag(3)  | 68.17(2)  |
| Ag(2)-Au(4)-Ag(3)   | 118.82(3) |
| Ag(12)-Au(4)-Ag(3)  | 115.87(3) |
| Ag(45)-Au(4)-Ag(3)  | 109.55(3) |
| Au(7)-Au(4)-Ag(3)   | 68.53(2)  |
| Ag(43)-Au(4)-Ag(3)  | 55.79(3)  |
| Au(9)-Au(4)-Ag(21)  | 60.72(2)  |
| Au(11)-Au(4)-Ag(21) | 125.41(3) |
| Au(15)-Au(4)-Ag(21) | 173.03(3) |
| Ag(2)-Au(4)-Ag(21)  | 61.00(3)  |
| Ag(12)-Au(4)-Ag(21) | 120.97(3) |
| Ag(45)-Au(4)-Ag(21) | 69.99(3)  |
| Au(7)-Au(4)-Ag(21)  | 111.06(3) |
| Ag(43)-Au(4)-Ag(21) | 67.33(3)  |
| Ag(3)-Au(4)-Ag(21)  | 113.29(3) |
| Au(9)-Au(4)-Ag(22)  | 116.45(3) |
| Au(11)-Au(4)-Ag(22) | 118.63(2) |
| Au(15)-Au(4)-Ag(22) | 105.19(3) |

|                     |             |
|---------------------|-------------|
| Ag(2)-Au(4)-Ag(22)  | 59.06(3)    |
| Ag(12)-Au(4)-Ag(22) | 62.12(3)    |
| Ag(45)-Au(4)-Ag(22) | 76.74(3)    |
| Au(7)-Au(4)-Ag(22)  | 105.13(2)   |
| Ag(43)-Au(4)-Ag(22) | 131.97(3)   |
| Ag(3)-Au(4)-Ag(22)  | 172.23(3)   |
| Ag(21)-Au(4)-Ag(22) | 72.80(3)    |
| Au(9)-Au(4)-Ag(19)  | 106.04(2)   |
| Au(11)-Au(4)-Ag(19) | 111.47(2)   |
| Au(15)-Au(4)-Ag(19) | 55.05(2)    |
| Ag(2)-Au(4)-Ag(19)  | 61.63(3)    |
| Ag(12)-Au(4)-Ag(19) | 70.04(3)    |
| Ag(45)-Au(4)-Ag(19) | 128.72(3)   |
| Au(7)-Au(4)-Ag(19)  | 52.45(2)    |
| Ag(43)-Au(4)-Ag(19) | 165.21(3)   |
| Ag(3)-Au(4)-Ag(19)  | 110.57(3)   |
| Ag(21)-Au(4)-Ag(19) | 119.12(3)   |
| Ag(22)-Au(4)-Ag(19) | 61.69(3)    |
| Au(10)-Au(5)-Ag(4)  | 174.16(3)   |
| Au(10)-Au(5)-Au(3)  | 122.75(2)   |
| Ag(4)-Au(5)-Au(3)   | 62.21(2)    |
| Au(10)-Au(5)-Au(17) | 62.061(18)  |
| Ag(4)-Au(5)-Au(17)  | 113.65(3)   |
| Au(3)-Au(5)-Au(17)  | 115.123(19) |
| Au(10)-Au(5)-Au(16) | 116.63(2)   |
| Ag(4)-Au(5)-Au(16)  | 62.16(2)    |
| Au(3)-Au(5)-Au(16)  | 60.431(17)  |
| Au(17)-Au(5)-Au(16) | 63.018(16)  |
| Au(10)-Au(5)-Ag(14) | 59.29(2)    |
| Ag(4)-Au(5)-Ag(14)  | 115.49(3)   |

|                     |           |
|---------------------|-----------|
| Au(3)-Au(5)-Ag(14)  | 174.84(3) |
| Au(17)-Au(5)-Ag(14) | 60.97(2)  |
| Au(16)-Au(5)-Ag(14) | 114.45(3) |
| Au(10)-Au(5)-Ag(41) | 62.83(2)  |
| Ag(4)-Au(5)-Ag(41)  | 118.14(3) |
| Au(3)-Au(5)-Ag(41)  | 121.75(3) |
| Au(17)-Au(5)-Ag(41) | 115.35(3) |
| Au(16)-Au(5)-Ag(41) | 177.79(3) |
| Ag(14)-Au(5)-Ag(41) | 63.37(3)  |
| Au(10)-Au(5)-Ag(46) | 67.24(2)  |
| Ag(4)-Au(5)-Ag(46)  | 118.59(3) |
| Au(3)-Au(5)-Ag(46)  | 65.47(2)  |
| Au(17)-Au(5)-Ag(46) | 116.11(3) |
| Au(16)-Au(5)-Ag(46) | 114.38(2) |
| Ag(14)-Au(5)-Ag(46) | 118.91(3) |
| Ag(41)-Au(5)-Ag(46) | 67.56(3)  |
| Au(10)-Au(5)-Ag(1)  | 64.99(2)  |
| Ag(4)-Au(5)-Ag(1)   | 118.04(3) |
| Au(3)-Au(5)-Ag(1)   | 62.33(2)  |
| Au(17)-Au(5)-Ag(1)  | 69.23(2)  |
| Au(16)-Au(5)-Ag(1)  | 68.03(2)  |
| Ag(14)-Au(5)-Ag(1)  | 117.24(3) |
| Ag(41)-Au(5)-Ag(1)  | 113.06(3) |
| Ag(46)-Au(5)-Ag(1)  | 55.32(3)  |
| Au(10)-Au(5)-Ag(23) | 122.75(3) |
| Ag(4)-Au(5)-Ag(23)  | 61.77(3)  |
| Au(3)-Au(5)-Ag(23)  | 60.42(2)  |
| Au(17)-Au(5)-Ag(23) | 174.46(3) |
| Au(16)-Au(5)-Ag(23) | 111.45(3) |
| Ag(14)-Au(5)-Ag(23) | 123.24(3) |

|                     |            |
|---------------------|------------|
| Ag(41)-Au(5)-Ag(23) | 70.17(3)   |
| Ag(46)-Au(5)-Ag(23) | 65.84(3)   |
| Ag(1)-Au(5)-Ag(23)  | 109.63(3)  |
| Au(10)-Au(5)-Ag(24) | 115.34(2)  |
| Ag(4)-Au(5)-Ag(24)  | 60.92(3)   |
| Au(3)-Au(5)-Ag(24)  | 119.92(3)  |
| Au(17)-Au(5)-Ag(24) | 103.85(2)  |
| Au(16)-Au(5)-Ag(24) | 106.18(2)  |
| Ag(14)-Au(5)-Ag(24) | 59.77(3)   |
| Ag(41)-Au(5)-Ag(24) | 72.55(3)   |
| Ag(46)-Au(5)-Ag(24) | 132.30(3)  |
| Ag(1)-Au(5)-Ag(24)  | 172.32(3)  |
| Ag(23)-Au(5)-Ag(24) | 76.93(3)   |
| Au(10)-Au(5)-Ag(20) | 111.10(3)  |
| Ag(4)-Au(5)-Ag(20)  | 63.34(3)   |
| Au(3)-Au(5)-Ag(20)  | 107.68(3)  |
| Au(17)-Au(5)-Ag(20) | 55.15(2)   |
| Au(16)-Au(5)-Ag(20) | 53.72(2)   |
| Ag(14)-Au(5)-Ag(20) | 67.46(3)   |
| Ag(41)-Au(5)-Ag(20) | 124.23(3)  |
| Ag(46)-Au(5)-Ag(20) | 166.74(3)  |
| Ag(1)-Au(5)-Ag(20)  | 111.64(3)  |
| Ag(23)-Au(5)-Ag(20) | 121.87(3)  |
| Ag(24)-Au(5)-Ag(20) | 60.80(3)   |
| Au(8)-Au(6)-Au(3)   | 121.09(2)  |
| Au(8)-Au(6)-Ag(5)   | 61.75(2)   |
| Au(3)-Au(6)-Ag(5)   | 174.73(3)  |
| Au(8)-Au(6)-Au(13)  | 115.58(2)  |
| Au(3)-Au(6)-Au(13)  | 61.937(17) |
| Ag(5)-Au(6)-Au(13)  | 113.01(3)  |

|                     |            |
|---------------------|------------|
| Au(8)-Au(6)-Ag(8)   | 177.88(3)  |
| Au(3)-Au(6)-Ag(8)   | 59.53(2)   |
| Ag(5)-Au(6)-Ag(8)   | 117.46(3)  |
| Au(13)-Au(6)-Ag(8)  | 62.69(2)   |
| Au(8)-Au(6)-Ag(33)  | 115.36(3)  |
| Au(3)-Au(6)-Ag(33)  | 64.08(2)   |
| Ag(5)-Au(6)-Ag(33)  | 119.48(3)  |
| Au(13)-Au(6)-Ag(33) | 118.92(3)  |
| Ag(8)-Au(6)-Ag(33)  | 66.76(3)   |
| Au(8)-Au(6)-Au(15)  | 60.762(17) |
| Au(3)-Au(6)-Au(15)  | 115.07(2)  |
| Ag(5)-Au(6)-Au(15)  | 61.73(2)   |
| Au(13)-Au(6)-Au(15) | 62.817(17) |
| Ag(8)-Au(6)-Au(15)  | 117.12(3)  |
| Ag(33)-Au(6)-Au(15) | 175.33(3)  |
| Au(8)-Au(6)-Ag(1)   | 63.37(2)   |
| Au(3)-Au(6)-Ag(1)   | 62.44(2)   |
| Ag(5)-Au(6)-Ag(1)   | 117.99(3)  |
| Au(13)-Au(6)-Ag(1)  | 68.72(2)   |
| Ag(8)-Au(6)-Ag(1)   | 116.29(3)  |
| Ag(33)-Au(6)-Ag(1)  | 108.35(3)  |
| Au(15)-Au(6)-Ag(1)  | 67.86(2)   |
| Au(8)-Au(6)-Ag(30)  | 59.73(2)   |
| Au(3)-Au(6)-Ag(30)  | 125.15(3)  |
| Ag(5)-Au(6)-Ag(30)  | 59.97(3)   |
| Au(13)-Au(6)-Ag(30) | 172.55(3)  |
| Ag(8)-Au(6)-Ag(30)  | 121.84(3)  |
| Ag(33)-Au(6)-Ag(30) | 68.34(3)   |
| Au(15)-Au(6)-Ag(30) | 110.09(3)  |
| Ag(1)-Au(6)-Ag(30)  | 111.55(3)  |



|                     |           |
|---------------------|-----------|
| Au(8)-Au(6)-Ag(25)  | 118.53(3) |
| Au(3)-Au(6)-Ag(25)  | 118.54(3) |
| Ag(5)-Au(6)-Ag(25)  | 60.16(3)  |
| Au(13)-Au(6)-Ag(25) | 103.94(2) |
| Ag(8)-Au(6)-Ag(25)  | 61.47(3)  |
| Ag(33)-Au(6)-Ag(25) | 78.63(3)  |
| Au(15)-Au(6)-Ag(25) | 105.39(2) |
| Ag(1)-Au(6)-Ag(25)  | 171.56(3) |
| Ag(30)-Au(6)-Ag(25) | 75.15(3)  |
| Au(8)-Au(6)-Ag(15)  | 106.42(2) |
| Au(3)-Au(6)-Ag(15)  | 111.71(2) |
| Ag(5)-Au(6)-Ag(15)  | 63.04(3)  |
| Au(13)-Au(6)-Ag(15) | 54.14(2)  |
| Ag(8)-Au(6)-Ag(15)  | 71.63(3)  |
| Ag(33)-Au(6)-Ag(15) | 132.74(3) |
| Au(15)-Au(6)-Ag(15) | 51.93(2)  |
| Ag(1)-Au(6)-Ag(15)  | 109.47(3) |
| Ag(30)-Au(6)-Ag(15) | 120.25(3) |
| Ag(25)-Au(6)-Ag(15) | 62.14(3)  |
| Au(8)-Au(6)-Ag(46)  | 69.47(2)  |
| Au(3)-Au(6)-Ag(46)  | 59.11(2)  |
| Ag(5)-Au(6)-Ag(46)  | 125.61(3) |
| Au(13)-Au(6)-Ag(46) | 108.49(2) |
| Ag(8)-Au(6)-Ag(46)  | 112.05(3) |
| Ag(33)-Au(6)-Ag(46) | 62.57(3)  |
| Au(15)-Au(6)-Ag(46) | 112.88(2) |
| Ag(1)-Au(6)-Ag(46)  | 50.36(2)  |
| Ag(30)-Au(6)-Ag(46) | 75.89(3)  |
| Ag(25)-Au(6)-Ag(46) | 137.94(3) |
| Ag(15)-Au(6)-Ag(46) | 159.58(3) |

|                     |             |
|---------------------|-------------|
| Ag(19)-Au(7)-Au(2)  | 120.41(3)   |
| Ag(19)-Au(7)-Au(8)  | 68.61(2)    |
| Au(2)-Au(7)-Au(8)   | 59.346(16)  |
| Ag(19)-Au(7)-Au(9)  | 120.45(3)   |
| Au(2)-Au(7)-Au(9)   | 118.33(2)   |
| Au(8)-Au(7)-Au(9)   | 160.17(2)   |
| Ag(19)-Au(7)-Ag(17) | 123.48(3)   |
| Au(2)-Au(7)-Ag(17)  | 73.02(2)    |
| Au(8)-Au(7)-Ag(17)  | 125.39(3)   |
| Au(9)-Au(7)-Ag(17)  | 66.57(2)    |
| Ag(19)-Au(7)-Au(4)  | 72.13(2)    |
| Au(2)-Au(7)-Au(4)   | 156.01(2)   |
| Au(8)-Au(7)-Au(4)   | 115.21(2)   |
| Au(9)-Au(7)-Au(4)   | 57.798(16)  |
| Ag(17)-Au(7)-Au(4)  | 119.08(3)   |
| Ag(19)-Au(7)-Ag(2)  | 68.17(3)    |
| Au(2)-Au(7)-Ag(2)   | 143.45(3)   |
| Au(8)-Au(7)-Ag(2)   | 135.76(3)   |
| Au(9)-Au(7)-Ag(2)   | 59.39(2)    |
| Ag(17)-Au(7)-Ag(2)  | 73.75(3)    |
| Au(4)-Au(7)-Ag(2)   | 58.35(2)    |
| Ag(19)-Au(7)-Au(18) | 179.34(3)   |
| Au(2)-Au(7)-Au(18)  | 59.916(15)  |
| Au(8)-Au(7)-Au(18)  | 111.38(2)   |
| Au(9)-Au(7)-Au(18)  | 59.340(15)  |
| Ag(17)-Au(7)-Au(18) | 57.10(2)    |
| Au(4)-Au(7)-Au(18)  | 107.347(19) |
| Ag(2)-Au(7)-Au(18)  | 111.95(2)   |
| Ag(19)-Au(7)-Au(15) | 60.06(2)    |
| Au(2)-Au(7)-Au(15)  | 108.69(2)   |

|                     |            |
|---------------------|------------|
| Au(8)-Au(7)-Au(15)  | 58.529(16) |
| Au(9)-Au(7)-Au(15)  | 108.74(2)  |
| Ag(17)-Au(7)-Au(15) | 174.98(3)  |
| Au(4)-Au(7)-Au(15)  | 57.545(16) |
| Ag(2)-Au(7)-Au(15)  | 105.73(2)  |
| Au(18)-Au(7)-Au(15) | 119.33(2)  |
| Ag(19)-Au(7)-Ag(6)  | 69.65(3)   |
| Au(2)-Au(7)-Ag(6)   | 58.63(2)   |
| Au(8)-Au(7)-Ag(6)   | 56.31(2)   |
| Au(9)-Au(7)-Ag(6)   | 141.85(3)  |
| Ag(17)-Au(7)-Ag(6)  | 77.45(3)   |
| Au(4)-Au(7)-Ag(6)   | 140.98(3)  |
| Ag(2)-Au(7)-Ag(6)   | 99.42(3)   |
| Au(18)-Au(7)-Ag(6)  | 110.92(2)  |
| Au(15)-Au(7)-Ag(6)  | 107.51(2)  |
| Ag(19)-Au(7)-Ag(1)  | 116.60(3)  |
| Au(2)-Au(7)-Ag(1)   | 57.09(2)   |
| Au(8)-Au(7)-Ag(1)   | 59.10(2)   |
| Au(9)-Au(7)-Ag(1)   | 102.25(2)  |
| Ag(17)-Au(7)-Ag(1)  | 115.31(3)  |
| Au(4)-Au(7)-Ag(1)   | 99.40(2)   |
| Ag(2)-Au(7)-Ag(1)   | 155.90(3)  |
| Au(18)-Au(7)-Ag(1)  | 63.01(2)   |
| Au(15)-Au(7)-Ag(1)  | 63.18(2)   |
| Ag(6)-Au(7)-Ag(1)   | 104.32(3)  |
| Ag(19)-Au(7)-Ag(3)  | 116.96(3)  |
| Au(2)-Au(7)-Ag(3)   | 99.80(2)   |
| Au(8)-Au(7)-Ag(3)   | 100.52(2)  |
| Au(9)-Au(7)-Ag(3)   | 59.78(2)   |
| Ag(17)-Au(7)-Ag(3)  | 113.07(3)  |

|                     |            |
|---------------------|------------|
| Au(4)-Au(7)-Ag(3)   | 56.920(19) |
| Ag(2)-Au(7)-Ag(3)   | 106.89(3)  |
| Au(18)-Au(7)-Ag(3)  | 62.39(2)   |
| Au(15)-Au(7)-Ag(3)  | 62.14(2)   |
| Ag(6)-Au(7)-Ag(3)   | 153.44(3)  |
| Ag(1)-Au(7)-Ag(3)   | 49.19(2)   |
| Ag(6)-Au(8)-Au(6)   | 177.47(3)  |
| Ag(6)-Au(8)-Au(2)   | 61.45(2)   |
| Au(6)-Au(8)-Au(2)   | 116.64(2)  |
| Ag(6)-Au(8)-Au(15)  | 117.66(3)  |
| Au(6)-Au(8)-Au(15)  | 61.117(18) |
| Au(2)-Au(8)-Au(15)  | 112.47(2)  |
| Ag(6)-Au(8)-Au(7)   | 64.11(2)   |
| Au(6)-Au(8)-Au(7)   | 113.62(2)  |
| Au(2)-Au(8)-Au(7)   | 59.771(16) |
| Au(15)-Au(8)-Au(7)  | 62.646(16) |
| Ag(6)-Au(8)-Ag(5)   | 121.82(3)  |
| Au(6)-Au(8)-Ag(5)   | 59.90(2)   |
| Au(2)-Au(8)-Ag(5)   | 173.57(3)  |
| Au(15)-Au(8)-Ag(5)  | 61.24(2)   |
| Au(7)-Au(8)-Ag(5)   | 115.74(3)  |
| Ag(6)-Au(8)-Ag(30)  | 116.77(3)  |
| Au(6)-Au(8)-Ag(30)  | 65.55(2)   |
| Au(2)-Au(8)-Ag(30)  | 123.11(3)  |
| Au(15)-Au(8)-Ag(30) | 115.07(3)  |
| Au(7)-Au(8)-Ag(30)  | 177.12(3)  |
| Ag(5)-Au(8)-Ag(30)  | 61.40(3)   |
| Ag(6)-Au(8)-Ag(1)   | 116.18(3)  |
| Au(6)-Au(8)-Ag(1)   | 61.40(2)   |
| Au(2)-Au(8)-Ag(1)   | 59.81(2)   |

|                     |             |
|---------------------|-------------|
| Au(15)-Au(8)-Ag(1)  | 67.24(2)    |
| Au(7)-Au(8)-Ag(1)   | 66.53(2)    |
| Ag(5)-Au(8)-Ag(1)   | 114.66(3)   |
| Ag(30)-Au(8)-Ag(1)  | 114.58(3)   |
| Ag(6)-Au(8)-Ag(38)  | 71.18(3)    |
| Au(6)-Au(8)-Ag(38)  | 109.48(3)   |
| Au(2)-Au(8)-Ag(38)  | 58.99(2)    |
| Au(15)-Au(8)-Ag(38) | 164.53(3)   |
| Au(7)-Au(8)-Ag(38)  | 115.66(2)   |
| Ag(5)-Au(8)-Ag(38)  | 126.73(3)   |
| Ag(30)-Au(8)-Ag(38) | 67.04(3)    |
| Ag(1)-Au(8)-Ag(38)  | 97.67(3)    |
| Ag(6)-Au(8)-Au(22)  | 66.13(2)    |
| Au(6)-Au(8)-Au(22)  | 116.20(2)   |
| Au(2)-Au(8)-Au(22)  | 124.37(2)   |
| Au(15)-Au(8)-Au(22) | 107.038(19) |
| Au(7)-Au(8)-Au(22)  | 111.46(2)   |
| Ag(5)-Au(8)-Au(22)  | 60.89(2)    |
| Ag(30)-Au(8)-Au(22) | 67.16(2)    |
| Ag(1)-Au(8)-Au(22)  | 174.28(2)   |
| Ag(38)-Au(8)-Au(22) | 88.03(2)    |
| Ag(6)-Au(8)-Ag(19)  | 66.98(3)    |
| Au(6)-Au(8)-Ag(19)  | 112.86(2)   |
| Au(2)-Au(8)-Ag(19)  | 108.39(2)   |
| Au(15)-Au(8)-Ag(19) | 56.78(2)    |
| Au(7)-Au(8)-Ag(19)  | 54.50(2)    |
| Ag(5)-Au(8)-Ag(19)  | 69.80(3)    |
| Ag(30)-Au(8)-Ag(19) | 122.98(3)   |
| Ag(1)-Au(8)-Ag(19)  | 111.24(3)   |
| Ag(38)-Au(8)-Ag(19) | 136.37(3)   |

|                     |            |
|---------------------|------------|
| Au(22)-Au(8)-Ag(19) | 64.33(2)   |
| Au(4)-Au(9)-Au(1)   | 115.21(2)  |
| Au(4)-Au(9)-Ag(7)   | 174.35(3)  |
| Au(1)-Au(9)-Ag(7)   | 62.68(2)   |
| Au(4)-Au(9)-Ag(2)   | 60.11(2)   |
| Au(1)-Au(9)-Ag(2)   | 172.70(3)  |
| Ag(7)-Au(9)-Ag(2)   | 121.38(3)  |
| Au(4)-Au(9)-Au(7)   | 61.561(17) |
| Au(1)-Au(9)-Au(7)   | 112.11(2)  |
| Ag(7)-Au(9)-Au(7)   | 113.81(3)  |
| Ag(2)-Au(9)-Au(7)   | 61.02(2)   |
| Au(4)-Au(9)-Au(18)  | 112.42(2)  |
| Au(1)-Au(9)-Au(18)  | 60.035(16) |
| Ag(7)-Au(9)-Au(18)  | 61.93(2)   |
| Ag(2)-Au(9)-Au(18)  | 115.49(3)  |
| Au(7)-Au(9)-Au(18)  | 61.776(16) |
| Au(4)-Au(9)-Ag(21)  | 62.97(2)   |
| Au(1)-Au(9)-Ag(21)  | 122.63(3)  |
| Ag(7)-Au(9)-Ag(21)  | 122.68(3)  |
| Ag(2)-Au(9)-Ag(21)  | 61.39(3)   |
| Au(7)-Au(9)-Ag(21)  | 113.63(3)  |
| Au(18)-Au(9)-Ag(21) | 175.16(3)  |
| Au(4)-Au(9)-Ag(27)  | 122.13(3)  |
| Au(1)-Au(9)-Ag(27)  | 59.48(2)   |
| Ag(7)-Au(9)-Ag(27)  | 61.97(3)   |
| Ag(2)-Au(9)-Ag(27)  | 127.46(3)  |
| Au(7)-Au(9)-Ag(27)  | 171.45(3)  |
| Au(18)-Au(9)-Ag(27) | 110.35(3)  |
| Ag(21)-Au(9)-Ag(27) | 74.13(3)   |
| Au(4)-Au(9)-Ag(43)  | 60.82(2)   |

|                     |           |
|---------------------|-----------|
| Au(1)-Au(9)-Ag(43)  | 65.57(2)  |
| Ag(7)-Au(9)-Ag(43)  | 120.49(3) |
| Ag(2)-Au(9)-Ag(43)  | 113.59(3) |
| Au(7)-Au(9)-Ag(43)  | 111.24(2) |
| Au(18)-Au(9)-Ag(43) | 112.73(3) |
| Ag(21)-Au(9)-Ag(43) | 66.84(3)  |
| Ag(27)-Au(9)-Ag(43) | 67.73(3)  |
| Au(4)-Au(9)-Au(24)  | 116.00(2) |
| Au(1)-Au(9)-Au(24)  | 125.29(2) |
| Ag(7)-Au(9)-Au(24)  | 67.93(2)  |
| Ag(2)-Au(9)-Au(24)  | 61.29(2)  |
| Au(7)-Au(9)-Au(24)  | 108.04(2) |
| Au(18)-Au(9)-Au(24) | 114.00(2) |
| Ag(21)-Au(9)-Au(24) | 68.28(2)  |
| Ag(27)-Au(9)-Au(24) | 77.77(2)  |
| Ag(43)-Au(9)-Au(24) | 128.95(2) |
| Au(4)-Au(9)-Ag(3)   | 60.49(2)  |
| Au(1)-Au(9)-Ag(3)   | 59.45(2)  |
| Ag(7)-Au(9)-Ag(3)   | 115.29(3) |
| Ag(2)-Au(9)-Ag(3)   | 113.86(3) |
| Au(7)-Au(9)-Ag(3)   | 67.14(2)  |
| Au(18)-Au(9)-Ag(3)  | 65.82(2)  |
| Ag(21)-Au(9)-Ag(3)  | 111.50(3) |
| Ag(27)-Au(9)-Ag(3)  | 107.23(3) |
| Ag(43)-Au(9)-Ag(3)  | 53.64(2)  |
| Au(24)-Au(9)-Ag(3)  | 174.85(3) |
| Au(4)-Au(9)-Ag(17)  | 113.75(2) |
| Au(1)-Au(9)-Ag(17)  | 108.55(2) |
| Ag(7)-Au(9)-Ag(17)  | 63.47(3)  |
| Ag(2)-Au(9)-Ag(17)  | 70.36(3)  |

|                      |             |
|----------------------|-------------|
| Au(7)-Au(9)-Ag(17)   | 56.95(2)    |
| Au(18)-Au(9)-Ag(17)  | 54.80(2)    |
| Ag(21)-Au(9)-Ag(17)  | 124.76(3)   |
| Ag(27)-Au(9)-Ag(17)  | 122.38(3)   |
| Ag(43)-Au(9)-Ag(17)  | 165.04(3)   |
| Au(24)-Au(9)-Ag(17)  | 65.93(2)    |
| Ag(3)-Au(9)-Ag(17)   | 111.39(3)   |
| Au(5)-Au(10)-Au(2)   | 114.77(2)   |
| Au(5)-Au(10)-Ag(14)  | 61.87(2)    |
| Au(2)-Au(10)-Ag(14)  | 173.18(3)   |
| Au(5)-Au(10)-Au(18)  | 110.81(2)   |
| Au(2)-Au(10)-Au(18)  | 61.533(16)  |
| Ag(14)-Au(10)-Au(18) | 113.32(3)   |
| Au(5)-Au(10)-Ag(10)  | 171.61(3)   |
| Au(2)-Au(10)-Ag(10)  | 60.54(2)    |
| Ag(14)-Au(10)-Ag(10) | 121.94(3)   |
| Au(18)-Au(10)-Ag(10) | 61.03(2)    |
| Au(5)-Au(10)-Au(17)  | 59.704(18)  |
| Au(2)-Au(10)-Au(17)  | 112.202(19) |
| Ag(14)-Au(10)-Au(17) | 61.03(2)    |
| Au(18)-Au(10)-Au(17) | 61.178(16)  |
| Ag(10)-Au(10)-Au(17) | 114.51(3)   |
| Au(5)-Au(10)-Ag(32)  | 123.93(3)   |
| Au(2)-Au(10)-Ag(32)  | 62.32(2)    |
| Ag(14)-Au(10)-Ag(32) | 124.48(3)   |
| Au(18)-Au(10)-Ag(32) | 113.02(3)   |
| Ag(10)-Au(10)-Ag(32) | 61.29(3)    |
| Au(17)-Au(10)-Ag(32) | 174.05(3)   |
| Au(5)-Au(10)-Ag(41)  | 60.08(2)    |
| Au(2)-Au(10)-Ag(41)  | 121.06(3)   |



|                      |           |
|----------------------|-----------|
| Ag(14)-Au(10)-Ag(41) | 63.25(3)  |
| Au(18)-Au(10)-Ag(41) | 170.89(3) |
| Ag(10)-Au(10)-Ag(41) | 128.08(3) |
| Au(17)-Au(10)-Ag(41) | 111.08(3) |
| Ag(32)-Au(10)-Ag(41) | 74.57(3)  |
| Au(5)-Au(10)-Au(21)  | 125.86(2) |
| Au(2)-Au(10)-Au(21)  | 116.23(2) |
| Ag(14)-Au(10)-Au(21) | 69.04(2)  |
| Au(18)-Au(10)-Au(21) | 108.34(2) |
| Ag(10)-Au(10)-Au(21) | 61.27(2)  |
| Au(17)-Au(10)-Au(21) | 113.62(2) |
| Ag(32)-Au(10)-Au(21) | 68.71(2)  |
| Ag(41)-Au(10)-Au(21) | 78.77(2)  |
| Au(5)-Au(10)-Ag(1)   | 60.27(2)  |
| Au(2)-Au(10)-Ag(1)   | 59.00(2)  |
| Ag(14)-Au(10)-Ag(1)  | 115.36(3) |
| Au(18)-Au(10)-Ag(1)  | 65.78(2)  |
| Ag(10)-Au(10)-Ag(1)  | 112.44(3) |
| Au(17)-Au(10)-Ag(1)  | 66.62(2)  |
| Ag(32)-Au(10)-Ag(1)  | 110.40(3) |
| Ag(41)-Au(10)-Ag(1)  | 107.37(3) |
| Au(21)-Au(10)-Ag(1)  | 173.49(3) |
| Au(5)-Au(10)-Ag(16)  | 108.27(3) |
| Au(2)-Au(10)-Ag(16)  | 113.52(2) |
| Ag(14)-Au(10)-Ag(16) | 63.89(3)  |
| Au(18)-Au(10)-Ag(16) | 56.90(2)  |
| Ag(10)-Au(10)-Ag(16) | 69.57(3)  |
| Au(17)-Au(10)-Ag(16) | 54.50(2)  |
| Ag(32)-Au(10)-Ag(16) | 124.38(3) |
| Ag(41)-Au(10)-Ag(16) | 123.81(3) |

|                      |             |
|----------------------|-------------|
| Au(21)-Au(10)-Ag(16) | 65.84(2)    |
| Ag(1)-Au(10)-Ag(16)  | 111.15(3)   |
| Au(5)-Au(10)-Ag(46)  | 59.00(2)    |
| Au(2)-Au(10)-Ag(46)  | 66.28(2)    |
| Ag(14)-Au(10)-Ag(46) | 113.98(3)   |
| Au(18)-Au(10)-Ag(46) | 112.74(2)   |
| Ag(10)-Au(10)-Ag(46) | 120.88(3)   |
| Au(17)-Au(10)-Ag(46) | 107.74(2)   |
| Ag(32)-Au(10)-Ag(46) | 72.73(3)    |
| Ag(41)-Au(10)-Ag(46) | 63.73(3)    |
| Au(21)-Au(10)-Ag(46) | 131.78(2)   |
| Ag(1)-Au(10)-Ag(46)  | 51.93(2)    |
| Ag(16)-Au(10)-Ag(46) | 161.65(3)   |
| Au(14)-Au(11)-Ag(12) | 175.15(3)   |
| Au(14)-Au(11)-Au(4)  | 118.16(2)   |
| Ag(12)-Au(11)-Au(4)  | 60.91(2)    |
| Au(14)-Au(11)-Ag(9)  | 59.11(2)    |
| Ag(12)-Au(11)-Ag(9)  | 121.41(3)   |
| Au(4)-Au(11)-Ag(9)   | 175.04(3)   |
| Au(14)-Au(11)-Au(13) | 61.007(16)  |
| Ag(12)-Au(11)-Au(13) | 114.54(3)   |
| Au(4)-Au(11)-Au(13)  | 112.68(2)   |
| Ag(9)-Au(11)-Au(13)  | 62.49(2)    |
| Au(14)-Au(11)-Au(15) | 113.292(19) |
| Ag(12)-Au(11)-Au(15) | 61.95(2)    |
| Au(4)-Au(11)-Au(15)  | 59.392(17)  |
| Ag(9)-Au(11)-Au(15)  | 117.13(3)   |
| Au(13)-Au(11)-Au(15) | 62.305(16)  |
| Au(14)-Au(11)-Ag(39) | 62.90(2)    |
| Ag(12)-Au(11)-Ag(39) | 121.90(3)   |

|                      |           |
|----------------------|-----------|
| Au(4)-Au(11)-Ag(39)  | 119.33(3) |
| Ag(9)-Au(11)-Ag(39)  | 63.82(3)  |
| Au(13)-Au(11)-Ag(39) | 115.96(3) |
| Au(15)-Au(11)-Ag(39) | 175.34(3) |
| Au(14)-Au(11)-Ag(45) | 120.43(3) |
| Ag(12)-Au(11)-Ag(45) | 63.67(3)  |
| Au(4)-Au(11)-Ag(45)  | 59.59(2)  |
| Ag(9)-Au(11)-Ag(45)  | 125.21(3) |
| Au(13)-Au(11)-Ag(45) | 172.19(3) |
| Au(15)-Au(11)-Ag(45) | 111.65(3) |
| Ag(39)-Au(11)-Ag(45) | 69.64(3)  |
| Au(14)-Au(11)-Ag(3)  | 60.93(2)  |
| Ag(12)-Au(11)-Ag(3)  | 116.18(3) |
| Au(4)-Au(11)-Ag(3)   | 61.35(2)  |
| Ag(9)-Au(11)-Ag(3)   | 114.44(3) |
| Au(13)-Au(11)-Ag(3)  | 67.28(2)  |
| Au(15)-Au(11)-Ag(3)  | 66.99(2)  |
| Ag(39)-Au(11)-Ag(3)  | 108.38(3) |
| Ag(45)-Au(11)-Ag(3)  | 106.22(3) |
| Au(14)-Au(11)-Au(19) | 115.26(2) |
| Ag(12)-Au(11)-Au(19) | 67.29(2)  |
| Au(4)-Au(11)-Au(19)  | 123.74(2) |
| Ag(9)-Au(11)-Au(19)  | 60.34(2)  |
| Au(13)-Au(11)-Au(19) | 107.33(2) |
| Au(15)-Au(11)-Au(19) | 112.65(2) |
| Ag(39)-Au(11)-Au(19) | 71.90(2)  |
| Ag(45)-Au(11)-Au(19) | 79.29(2)  |
| Ag(3)-Au(11)-Au(19)  | 174.30(3) |
| Au(14)-Au(11)-Ag(15) | 112.84(2) |
| Ag(12)-Au(11)-Ag(15) | 64.02(3)  |

|                      |            |
|----------------------|------------|
| Au(4)-Au(11)-Ag(15)  | 107.47(3)  |
| Ag(9)-Au(11)-Ag(15)  | 71.19(3)   |
| Au(13)-Au(11)-Ag(15) | 57.06(2)   |
| Au(15)-Au(11)-Ag(15) | 54.77(2)   |
| Ag(39)-Au(11)-Ag(15) | 128.57(3)  |
| Ag(45)-Au(11)-Ag(15) | 124.57(3)  |
| Ag(3)-Au(11)-Ag(15)  | 112.05(3)  |
| Au(19)-Au(11)-Ag(15) | 64.81(2)   |
| Au(14)-Au(11)-Ag(43) | 70.57(2)   |
| Ag(12)-Au(11)-Ag(43) | 111.14(3)  |
| Au(4)-Au(11)-Ag(43)  | 57.75(2)   |
| Ag(9)-Au(11)-Ag(43)  | 122.45(3)  |
| Au(13)-Au(11)-Ag(43) | 115.33(2)  |
| Au(15)-Au(11)-Ag(43) | 106.69(2)  |
| Ag(39)-Au(11)-Ag(43) | 69.82(3)   |
| Ag(45)-Au(11)-Ag(43) | 60.48(3)   |
| Ag(3)-Au(11)-Ag(43)  | 52.31(2)   |
| Au(19)-Au(11)-Ag(43) | 131.68(2)  |
| Ag(15)-Au(11)-Ag(43) | 161.37(3)  |
| Au(14)-Au(12)-Ag(13) | 61.88(2)   |
| Au(14)-Au(12)-Au(1)  | 115.84(2)  |
| Ag(13)-Au(12)-Au(1)  | 174.21(3)  |
| Au(14)-Au(12)-Au(17) | 113.34(2)  |
| Ag(13)-Au(12)-Au(17) | 114.65(3)  |
| Au(1)-Au(12)-Au(17)  | 60.726(18) |
| Au(14)-Au(12)-Ag(11) | 174.72(3)  |
| Ag(13)-Au(12)-Ag(11) | 122.36(3)  |
| Au(1)-Au(12)-Ag(11)  | 59.60(2)   |
| Au(17)-Au(12)-Ag(11) | 62.53(2)   |
| Au(14)-Au(12)-Au(16) | 60.106(16) |

|                      |            |
|----------------------|------------|
| Ag(13)-Au(12)-Au(16) | 61.75(2)   |
| Au(1)-Au(12)-Au(16)  | 112.46(2)  |
| Au(17)-Au(12)-Au(16) | 62.808(16) |
| Ag(11)-Au(12)-Au(16) | 118.18(3)  |
| Au(14)-Au(12)-Ag(44) | 112.87(3)  |
| Ag(13)-Au(12)-Ag(44) | 123.88(3)  |
| Au(1)-Au(12)-Ag(44)  | 61.80(2)   |
| Au(17)-Au(12)-Ag(44) | 117.07(3)  |
| Ag(11)-Au(12)-Ag(44) | 67.99(3)   |
| Au(16)-Au(12)-Ag(44) | 169.14(3)  |
| Au(14)-Au(12)-Ag(42) | 59.58(2)   |
| Ag(13)-Au(12)-Ag(42) | 65.81(3)   |
| Au(1)-Au(12)-Ag(42)  | 118.23(3)  |
| Au(17)-Au(12)-Ag(42) | 172.26(3)  |
| Ag(11)-Au(12)-Ag(42) | 124.32(3)  |
| Au(16)-Au(12)-Ag(42) | 112.79(3)  |
| Ag(44)-Au(12)-Ag(42) | 65.91(3)   |
| Au(14)-Au(12)-Ag(3)  | 60.63(2)   |
| Ag(13)-Au(12)-Ag(3)  | 115.59(3)  |
| Au(1)-Au(12)-Ag(3)   | 59.96(2)   |
| Au(17)-Au(12)-Ag(3)  | 67.05(2)   |
| Ag(11)-Au(12)-Ag(3)  | 114.11(3)  |
| Au(16)-Au(12)-Ag(3)  | 66.16(2)   |
| Ag(44)-Au(12)-Ag(3)  | 103.41(3)  |
| Ag(42)-Au(12)-Ag(3)  | 105.53(3)  |
| Au(14)-Au(12)-Au(20) | 123.98(2)  |
| Ag(13)-Au(12)-Au(20) | 67.46(2)   |
| Au(1)-Au(12)-Au(20)  | 116.68(2)  |
| Au(17)-Au(12)-Au(20) | 108.13(2)  |
| Ag(11)-Au(12)-Au(20) | 61.26(2)   |

|                      |            |
|----------------------|------------|
| Au(16)-Au(12)-Au(20) | 113.54(2)  |
| Ag(44)-Au(12)-Au(20) | 77.12(2)   |
| Ag(42)-Au(12)-Au(20) | 79.35(2)   |
| Ag(3)-Au(12)-Au(20)  | 174.92(3)  |
| Au(14)-Au(12)-Ag(20) | 108.67(3)  |
| Ag(13)-Au(12)-Ag(20) | 64.73(3)   |
| Au(1)-Au(12)-Ag(20)  | 112.51(3)  |
| Au(17)-Au(12)-Ag(20) | 56.07(2)   |
| Ag(11)-Au(12)-Ag(20) | 72.15(3)   |
| Au(16)-Au(12)-Ag(20) | 54.46(2)   |
| Ag(44)-Au(12)-Ag(20) | 135.51(3)  |
| Ag(42)-Au(12)-Ag(20) | 127.59(3)  |
| Ag(3)-Au(12)-Ag(20)  | 110.36(3)  |
| Au(20)-Au(12)-Ag(20) | 66.79(2)   |
| Ag(29)-Au(13)-Au(6)  | 117.81(3)  |
| Ag(29)-Au(13)-Au(11) | 124.13(3)  |
| Au(6)-Au(13)-Au(11)  | 117.45(2)  |
| Ag(29)-Au(13)-Au(14) | 73.77(3)   |
| Au(6)-Au(13)-Au(14)  | 156.56(2)  |
| Au(11)-Au(13)-Au(14) | 58.499(17) |
| Ag(29)-Au(13)-Ag(15) | 124.51(3)  |
| Au(6)-Au(13)-Ag(15)  | 72.90(2)   |
| Au(11)-Au(13)-Ag(15) | 66.46(2)   |
| Au(14)-Au(13)-Ag(15) | 119.03(3)  |
| Ag(29)-Au(13)-Au(3)  | 67.55(2)   |
| Au(6)-Au(13)-Au(3)   | 58.515(17) |
| Au(11)-Au(13)-Au(3)  | 157.58(2)  |
| Au(14)-Au(13)-Au(3)  | 115.22(2)  |
| Ag(15)-Au(13)-Au(3)  | 125.60(3)  |
| Ag(29)-Au(13)-Ag(8)  | 67.53(3)   |

|                      |             |
|----------------------|-------------|
| Au(6)-Au(13)-Ag(8)   | 58.67(2)    |
| Au(11)-Au(13)-Ag(8)  | 142.74(3)   |
| Au(14)-Au(13)-Ag(8)  | 140.26(3)   |
| Ag(15)-Au(13)-Ag(8)  | 78.14(3)    |
| Au(3)-Au(13)-Ag(8)   | 57.17(2)    |
| Ag(29)-Au(13)-Ag(9)  | 72.26(3)    |
| Au(6)-Au(13)-Ag(9)   | 143.85(3)   |
| Au(11)-Au(13)-Ag(9)  | 58.60(2)    |
| Au(14)-Au(13)-Ag(9)  | 57.06(2)    |
| Ag(15)-Au(13)-Ag(9)  | 73.56(3)    |
| Au(3)-Au(13)-Ag(9)   | 139.26(3)   |
| Ag(8)-Au(13)-Ag(9)   | 101.35(3)   |
| Ag(29)-Au(13)-Au(15) | 176.56(3)   |
| Au(6)-Au(13)-Au(15)  | 59.041(17)  |
| Au(11)-Au(13)-Au(15) | 59.208(16)  |
| Au(14)-Au(13)-Au(15) | 108.63(2)   |
| Ag(15)-Au(13)-Au(15) | 56.77(2)    |
| Au(3)-Au(13)-Au(15)  | 109.04(2)   |
| Ag(8)-Au(13)-Au(15)  | 110.44(3)   |
| Ag(9)-Au(13)-Au(15)  | 111.06(2)   |
| Ag(29)-Au(13)-Au(16) | 59.78(2)    |
| Au(6)-Au(13)-Au(16)  | 108.35(2)   |
| Au(11)-Au(13)-Au(16) | 108.796(19) |
| Au(14)-Au(13)-Au(16) | 57.916(16)  |
| Ag(15)-Au(13)-Au(16) | 174.70(3)   |
| Au(3)-Au(13)-Au(16)  | 57.991(15)  |
| Ag(8)-Au(13)-Au(16)  | 106.97(2)   |
| Ag(9)-Au(13)-Au(16)  | 106.30(2)   |
| Au(15)-Au(13)-Au(16) | 119.15(2)   |
| Ag(29)-Au(13)-Ag(3)  | 117.69(3)   |

|                      |            |
|----------------------|------------|
| Au(6)-Au(13)-Ag(3)   | 100.19(2)  |
| Au(11)-Au(13)-Ag(3)  | 58.46(2)   |
| Au(14)-Au(13)-Ag(3)  | 57.16(2)   |
| Ag(15)-Au(13)-Ag(3)  | 112.46(3)  |
| Au(3)-Au(13)-Ag(3)   | 99.50(2)   |
| Ag(8)-Au(13)-Ag(3)   | 153.72(3)  |
| Ag(9)-Au(13)-Ag(3)   | 104.71(3)  |
| Au(15)-Au(13)-Ag(3)  | 62.79(2)   |
| Au(16)-Au(13)-Ag(3)  | 62.33(2)   |
| Ag(29)-Au(13)-Ag(1)  | 114.87(3)  |
| Au(6)-Au(13)-Ag(1)   | 57.55(2)   |
| Au(11)-Au(13)-Ag(1)  | 100.80(2)  |
| Au(14)-Au(13)-Ag(1)  | 99.42(2)   |
| Ag(15)-Au(13)-Ag(1)  | 115.17(3)  |
| Au(3)-Au(13)-Ag(1)   | 57.60(2)   |
| Ag(8)-Au(13)-Ag(1)   | 104.56(3)  |
| Ag(9)-Au(13)-Ag(1)   | 153.85(3)  |
| Au(15)-Au(13)-Ag(1)  | 62.59(2)   |
| Au(16)-Au(13)-Ag(1)  | 62.64(2)   |
| Ag(3)-Au(13)-Ag(1)   | 49.23(2)   |
| Au(12)-Au(14)-Ag(9)  | 175.74(3)  |
| Au(12)-Au(14)-Au(11) | 122.25(2)  |
| Ag(9)-Au(14)-Au(11)  | 61.31(2)   |
| Au(12)-Au(14)-Au(16) | 61.509(17) |
| Ag(9)-Au(14)-Au(16)  | 115.37(3)  |
| Au(11)-Au(14)-Au(16) | 114.71(2)  |
| Au(12)-Au(14)-Ag(13) | 59.39(2)   |
| Ag(9)-Au(14)-Ag(13)  | 116.84(3)  |
| Au(11)-Au(14)-Ag(13) | 175.06(3)  |
| Au(16)-Au(14)-Ag(13) | 61.40(2)   |



|                      |            |
|----------------------|------------|
| Au(12)-Au(14)-Au(13) | 116.00(2)  |
| Ag(9)-Au(14)-Au(13)  | 63.06(2)   |
| Au(11)-Au(14)-Au(13) | 60.494(17) |
| Au(16)-Au(14)-Au(13) | 62.843(16) |
| Ag(13)-Au(14)-Au(13) | 114.58(3)  |
| Au(12)-Au(14)-Ag(42) | 64.12(2)   |
| Ag(9)-Au(14)-Ag(42)  | 116.93(3)  |
| Au(11)-Au(14)-Ag(42) | 118.29(3)  |
| Au(16)-Au(14)-Ag(42) | 117.93(3)  |
| Ag(13)-Au(14)-Ag(42) | 66.65(3)   |
| Au(13)-Au(14)-Ag(42) | 178.71(3)  |
| Au(12)-Au(14)-Ag(3)  | 64.00(2)   |
| Ag(9)-Au(14)-Ag(3)   | 118.16(3)  |
| Au(11)-Au(14)-Ag(3)  | 62.91(2)   |
| Au(16)-Au(14)-Ag(3)  | 67.91(2)   |
| Ag(13)-Au(14)-Ag(3)  | 116.37(3)  |
| Au(13)-Au(14)-Ag(3)  | 67.85(2)   |
| Ag(42)-Au(14)-Ag(3)  | 111.34(3)  |
| Au(12)-Au(14)-Ag(39) | 119.64(3)  |
| Ag(9)-Au(14)-Ag(39)  | 63.73(3)   |
| Au(11)-Au(14)-Ag(39) | 60.67(2)   |
| Au(16)-Au(14)-Ag(39) | 175.32(3)  |
| Ag(13)-Au(14)-Ag(39) | 123.25(3)  |
| Au(13)-Au(14)-Ag(39) | 113.61(3)  |
| Ag(42)-Au(14)-Ag(39) | 65.55(3)   |
| Ag(3)-Au(14)-Ag(39)  | 108.20(3)  |
| Au(12)-Au(14)-Ag(35) | 115.81(3)  |
| Ag(9)-Au(14)-Ag(35)  | 61.37(3)   |
| Au(11)-Au(14)-Ag(35) | 120.43(3)  |
| Au(16)-Au(14)-Ag(35) | 103.00(3)  |

|                      |            |
|----------------------|------------|
| Ag(13)-Au(14)-Ag(35) | 59.40(3)   |
| Au(13)-Au(14)-Ag(35) | 105.06(3)  |
| Ag(42)-Au(14)-Ag(35) | 75.87(3)   |
| Ag(3)-Au(14)-Ag(35)  | 170.14(3)  |
| Ag(39)-Au(14)-Ag(35) | 80.70(3)   |
| Au(12)-Au(14)-Ag(29) | 110.41(2)  |
| Ag(9)-Au(14)-Ag(29)  | 65.59(3)   |
| Au(11)-Au(14)-Ag(29) | 106.59(2)  |
| Au(16)-Au(14)-Ag(29) | 54.03(2)   |
| Ag(13)-Au(14)-Ag(29) | 68.78(3)   |
| Au(13)-Au(14)-Ag(29) | 51.76(2)   |
| Ag(42)-Au(14)-Ag(29) | 129.51(3)  |
| Ag(3)-Au(14)-Ag(29)  | 108.80(3)  |
| Ag(39)-Au(14)-Ag(29) | 126.83(3)  |
| Ag(35)-Au(14)-Ag(29) | 61.61(3)   |
| Ag(15)-Au(15)-Au(4)  | 118.19(3)  |
| Ag(15)-Au(15)-Au(8)  | 123.19(3)  |
| Au(4)-Au(15)-Au(8)   | 117.68(2)  |
| Ag(15)-Au(15)-Au(6)  | 73.94(2)   |
| Au(4)-Au(15)-Au(6)   | 157.17(2)  |
| Au(8)-Au(15)-Au(6)   | 58.121(16) |
| Ag(15)-Au(15)-Au(11) | 67.44(2)   |
| Au(4)-Au(15)-Au(11)  | 59.097(16) |
| Au(8)-Au(15)-Au(11)  | 159.43(2)  |
| Au(6)-Au(15)-Au(11)  | 115.86(2)  |
| Ag(15)-Au(15)-Ag(19) | 123.19(3)  |
| Au(4)-Au(15)-Ag(19)  | 71.65(2)   |
| Au(8)-Au(15)-Ag(19)  | 67.36(2)   |
| Au(6)-Au(15)-Ag(19)  | 119.70(3)  |
| Au(11)-Au(15)-Ag(19) | 124.12(3)  |

|                      |            |
|----------------------|------------|
| Ag(15)-Au(15)-Ag(5)  | 70.41(3)   |
| Au(4)-Au(15)-Ag(5)   | 142.04(3)  |
| Au(8)-Au(15)-Ag(5)   | 59.72(2)   |
| Au(6)-Au(15)-Ag(5)   | 58.44(2)   |
| Au(11)-Au(15)-Ag(5)  | 136.89(3)  |
| Ag(19)-Au(15)-Ag(5)  | 73.57(3)   |
| Ag(15)-Au(15)-Ag(12) | 67.33(3)   |
| Au(4)-Au(15)-Ag(12)  | 59.35(2)   |
| Au(8)-Au(15)-Ag(12)  | 140.80(3)  |
| Au(6)-Au(15)-Ag(12)  | 139.86(3)  |
| Au(11)-Au(15)-Ag(12) | 57.75(2)   |
| Ag(19)-Au(15)-Ag(12) | 75.89(3)   |
| Ag(5)-Au(15)-Ag(12)  | 97.72(3)   |
| Ag(15)-Au(15)-Au(13) | 59.96(2)   |
| Au(4)-Au(15)-Au(13)  | 109.20(2)  |
| Au(8)-Au(15)-Au(13)  | 109.26(2)  |
| Au(6)-Au(15)-Au(13)  | 58.142(16) |
| Au(11)-Au(15)-Au(13) | 58.488(16) |
| Ag(19)-Au(15)-Au(13) | 176.16(3)  |
| Ag(5)-Au(15)-Au(13)  | 106.54(3)  |
| Ag(12)-Au(15)-Au(13) | 107.83(3)  |
| Ag(15)-Au(15)-Au(7)  | 177.95(3)  |
| Au(4)-Au(15)-Au(7)   | 59.761(16) |
| Au(8)-Au(15)-Au(7)   | 58.825(16) |
| Au(6)-Au(15)-Au(7)   | 107.96(2)  |
| Au(11)-Au(15)-Au(7)  | 110.79(2)  |
| Ag(19)-Au(15)-Au(7)  | 56.71(2)   |
| Ag(5)-Au(15)-Au(7)   | 111.16(3)  |
| Ag(12)-Au(15)-Au(7)  | 110.94(3)  |
| Au(13)-Au(15)-Au(7)  | 120.23(2)  |

|                      |            |
|----------------------|------------|
| Ag(15)-Au(15)-Ag(3)  | 115.24(3)  |
| Au(4)-Au(15)-Ag(3)   | 58.108(19) |
| Au(8)-Au(15)-Ag(3)   | 101.95(2)  |
| Au(6)-Au(15)-Ag(3)   | 99.63(2)   |
| Au(11)-Au(15)-Ag(3)  | 58.29(2)   |
| Ag(19)-Au(15)-Ag(3)  | 115.55(3)  |
| Ag(5)-Au(15)-Ag(3)   | 156.11(3)  |
| Ag(12)-Au(15)-Ag(3)  | 105.86(3)  |
| Au(13)-Au(15)-Ag(3)  | 62.83(2)   |
| Au(7)-Au(15)-Ag(3)   | 63.91(2)   |
| Ag(15)-Au(15)-Ag(1)  | 118.76(3)  |
| Au(4)-Au(15)-Ag(1)   | 100.24(2)  |
| Au(8)-Au(15)-Ag(1)   | 58.85(2)   |
| Au(6)-Au(15)-Ag(1)   | 57.60(2)   |
| Au(11)-Au(15)-Ag(1)  | 100.84(2)  |
| Ag(19)-Au(15)-Ag(1)  | 112.88(3)  |
| Ag(5)-Au(15)-Ag(1)   | 106.91(3)  |
| Ag(12)-Au(15)-Ag(1)  | 155.27(3)  |
| Au(13)-Au(15)-Ag(1)  | 63.33(2)   |
| Au(7)-Au(15)-Ag(1)   | 62.30(2)   |
| Ag(3)-Au(15)-Ag(1)   | 49.42(2)   |
| Ag(20)-Au(16)-Au(14) | 119.78(3)  |
| Ag(20)-Au(16)-Au(3)  | 121.29(3)  |
| Au(14)-Au(16)-Au(3)  | 118.23(2)  |
| Ag(20)-Au(16)-Au(5)  | 70.87(2)   |
| Au(14)-Au(16)-Au(5)  | 157.25(2)  |
| Au(3)-Au(16)-Au(5)   | 59.013(16) |
| Ag(20)-Au(16)-Ag(29) | 123.62(3)  |
| Au(14)-Au(16)-Ag(29) | 72.94(2)   |
| Au(3)-Au(16)-Ag(29)  | 67.00(2)   |

|                      |            |
|----------------------|------------|
| Au(5)-Au(16)-Ag(29)  | 119.78(3)  |
| Ag(20)-Au(16)-Au(12) | 68.79(2)   |
| Au(14)-Au(16)-Au(12) | 58.385(16) |
| Au(3)-Au(16)-Au(12)  | 159.67(2)  |
| Au(5)-Au(16)-Au(12)  | 115.29(2)  |
| Ag(29)-Au(16)-Au(12) | 124.47(3)  |
| Ag(20)-Au(16)-Ag(13) | 68.94(3)   |
| Au(14)-Au(16)-Ag(13) | 59.95(2)   |
| Au(3)-Au(16)-Ag(13)  | 140.49(3)  |
| Au(5)-Au(16)-Ag(13)  | 138.43(3)  |
| Ag(29)-Au(16)-Ag(13) | 76.05(3)   |
| Au(12)-Au(16)-Ag(13) | 57.95(2)   |
| Ag(20)-Au(16)-Ag(4)  | 68.48(3)   |
| Au(14)-Au(16)-Ag(4)  | 143.01(3)  |
| Au(3)-Au(16)-Ag(4)   | 60.33(2)   |
| Au(5)-Au(16)-Ag(4)   | 58.15(2)   |
| Ag(29)-Au(16)-Ag(4)  | 73.63(3)   |
| Au(12)-Au(16)-Ag(4)  | 136.01(3)  |
| Ag(13)-Au(16)-Ag(4)  | 96.81(3)   |
| Ag(20)-Au(16)-Au(17) | 59.26(2)   |
| Au(14)-Au(16)-Au(17) | 107.86(2)  |
| Au(3)-Au(16)-Au(17)  | 109.81(2)  |
| Au(5)-Au(16)-Au(17)  | 58.247(17) |
| Ag(29)-Au(16)-Au(17) | 176.38(3)  |
| Au(12)-Au(16)-Au(17) | 58.007(16) |
| Ag(13)-Au(16)-Au(17) | 107.45(3)  |
| Ag(4)-Au(16)-Au(17)  | 106.51(2)  |
| Ag(20)-Au(16)-Au(13) | 178.99(3)  |
| Au(14)-Au(16)-Au(13) | 59.241(15) |
| Au(3)-Au(16)-Au(13)  | 59.722(16) |

|                      |             |
|----------------------|-------------|
| Au(5)-Au(16)-Au(13)  | 109.94(2)   |
| Ag(29)-Au(16)-Au(13) | 56.61(2)    |
| Au(12)-Au(16)-Au(13) | 110.234(19) |
| Ag(13)-Au(16)-Au(13) | 110.37(3)   |
| Ag(4)-Au(16)-Au(13)  | 112.43(3)   |
| Au(17)-Au(16)-Au(13) | 120.56(2)   |
| Ag(20)-Au(16)-Ag(3)  | 116.38(3)   |
| Au(14)-Au(16)-Ag(3)  | 57.73(2)    |
| Au(3)-Au(16)-Ag(3)   | 101.09(2)   |
| Au(5)-Au(16)-Ag(3)   | 99.74(2)    |
| Ag(29)-Au(16)-Ag(3)  | 115.40(3)   |
| Au(12)-Au(16)-Ag(3)  | 59.41(2)    |
| Ag(13)-Au(16)-Ag(3)  | 107.12(3)   |
| Ag(4)-Au(16)-Ag(3)   | 155.77(3)   |
| Au(17)-Au(16)-Ag(3)  | 63.01(2)    |
| Au(13)-Au(16)-Ag(3)  | 63.00(2)    |
| Ag(20)-Au(16)-Ag(1)  | 117.10(3)   |
| Au(14)-Au(16)-Ag(1)  | 100.68(2)   |
| Au(3)-Au(16)-Ag(1)   | 58.24(2)    |
| Au(5)-Au(16)-Ag(1)   | 57.72(2)    |
| Ag(29)-Au(16)-Ag(1)  | 112.64(3)   |
| Au(12)-Au(16)-Ag(1)  | 101.71(2)   |
| Ag(13)-Au(16)-Ag(1)  | 156.61(3)   |
| Ag(4)-Au(16)-Ag(1)   | 106.44(3)   |
| Au(17)-Au(16)-Ag(1)  | 63.78(2)    |
| Au(13)-Au(16)-Ag(1)  | 63.21(2)    |
| Ag(3)-Au(16)-Ag(1)   | 49.52(2)    |
| Ag(16)-Au(17)-Au(12) | 123.80(3)   |
| Ag(16)-Au(17)-Au(5)  | 118.38(3)   |
| Au(12)-Au(17)-Au(5)  | 116.92(2)   |

|                      |             |
|----------------------|-------------|
| Ag(16)-Au(17)-Au(1)  | 74.07(3)    |
| Au(12)-Au(17)-Au(1)  | 59.249(16)  |
| Au(5)-Au(17)-Au(1)   | 155.73(2)   |
| Ag(16)-Au(17)-Ag(20) | 123.26(3)   |
| Au(12)-Au(17)-Ag(20) | 68.44(2)    |
| Au(5)-Au(17)-Ag(20)  | 70.21(2)    |
| Au(1)-Au(17)-Ag(20)  | 122.42(3)   |
| Ag(16)-Au(17)-Ag(14) | 67.75(3)    |
| Au(12)-Au(17)-Ag(14) | 138.93(3)   |
| Au(5)-Au(17)-Ag(14)  | 60.23(2)    |
| Au(1)-Au(17)-Ag(14)  | 140.27(3)   |
| Ag(20)-Au(17)-Ag(14) | 73.21(3)    |
| Ag(16)-Au(17)-Au(10) | 67.43(2)    |
| Au(12)-Au(17)-Au(10) | 160.59(2)   |
| Au(5)-Au(17)-Au(10)  | 58.235(16)  |
| Au(1)-Au(17)-Au(10)  | 116.32(2)   |
| Ag(20)-Au(17)-Au(10) | 120.96(3)   |
| Ag(14)-Au(17)-Au(10) | 57.85(2)    |
| Ag(16)-Au(17)-Au(18) | 60.36(2)    |
| Au(12)-Au(17)-Au(18) | 110.957(19) |
| Au(5)-Au(17)-Au(18)  | 107.29(2)   |
| Au(1)-Au(17)-Au(18)  | 58.780(16)  |
| Ag(20)-Au(17)-Au(18) | 176.18(3)   |
| Ag(14)-Au(17)-Au(18) | 108.27(3)   |
| Au(10)-Au(17)-Au(18) | 58.412(16)  |
| Ag(16)-Au(17)-Ag(11) | 70.92(3)    |
| Au(12)-Au(17)-Ag(11) | 58.86(2)    |
| Au(5)-Au(17)-Ag(11)  | 143.82(3)   |
| Au(1)-Au(17)-Ag(11)  | 57.94(2)    |
| Ag(20)-Au(17)-Ag(11) | 75.94(3)    |

|                      |            |
|----------------------|------------|
| Ag(14)-Au(17)-Ag(11) | 98.25(3)   |
| Au(10)-Au(17)-Ag(11) | 137.41(3)  |
| Au(18)-Au(17)-Ag(11) | 107.12(3)  |
| Ag(16)-Au(17)-Au(16) | 177.01(3)  |
| Au(12)-Au(17)-Au(16) | 59.185(17) |
| Au(5)-Au(17)-Au(16)  | 58.735(16) |
| Au(1)-Au(17)-Au(16)  | 108.30(2)  |
| Ag(20)-Au(17)-Au(16) | 57.22(2)   |
| Ag(14)-Au(17)-Au(16) | 110.24(3)  |
| Au(10)-Au(17)-Au(16) | 109.68(2)  |
| Au(18)-Au(17)-Au(16) | 119.08(2)  |
| Ag(11)-Au(17)-Au(16) | 111.80(3)  |
| Ag(16)-Au(17)-Ag(3)  | 118.53(3)  |
| Au(12)-Au(17)-Ag(3)  | 59.47(2)   |
| Au(5)-Au(17)-Ag(3)   | 99.59(2)   |
| Au(1)-Au(17)-Ag(3)   | 56.95(2)   |
| Ag(20)-Au(17)-Ag(3)  | 113.97(3)  |
| Ag(14)-Au(17)-Ag(3)  | 156.13(3)  |
| Au(10)-Au(17)-Ag(3)  | 101.69(2)  |
| Au(18)-Au(17)-Ag(3)  | 63.23(2)   |
| Ag(11)-Au(17)-Ag(3)  | 105.56(3)  |
| Au(16)-Au(17)-Ag(3)  | 62.34(2)   |
| Ag(16)-Au(17)-Ag(1)  | 115.81(3)  |
| Au(12)-Au(17)-Ag(1)  | 101.47(2)  |
| Au(5)-Au(17)-Ag(1)   | 57.294(19) |
| Au(1)-Au(17)-Ag(1)   | 98.88(2)   |
| Ag(20)-Au(17)-Ag(1)  | 113.99(3)  |
| Ag(14)-Au(17)-Ag(1)  | 107.12(3)  |
| Au(10)-Au(17)-Ag(1)  | 59.55(2)   |
| Au(18)-Au(17)-Ag(1)  | 62.27(2)   |



|                      |            |
|----------------------|------------|
| Ag(11)-Au(17)-Ag(1)  | 154.45(3)  |
| Au(16)-Au(17)-Ag(1)  | 62.32(2)   |
| Ag(3)-Au(17)-Ag(1)   | 49.02(2)   |
| Ag(17)-Au(18)-Au(1)  | 118.48(3)  |
| Ag(17)-Au(18)-Au(10) | 121.34(3)  |
| Au(1)-Au(18)-Au(10)  | 118.87(2)  |
| Ag(17)-Au(18)-Ag(16) | 120.91(3)  |
| Au(1)-Au(18)-Ag(16)  | 73.02(2)   |
| Au(10)-Au(18)-Ag(16) | 67.08(2)   |
| Ag(17)-Au(18)-Au(9)  | 67.62(2)   |
| Au(1)-Au(18)-Au(9)   | 58.563(17) |
| Au(10)-Au(18)-Au(9)  | 162.48(2)  |
| Ag(16)-Au(18)-Au(9)  | 123.36(3)  |
| Ag(17)-Au(18)-Au(2)  | 73.57(3)   |
| Au(1)-Au(18)-Au(2)   | 156.57(2)  |
| Au(10)-Au(18)-Au(2)  | 58.415(16) |
| Ag(16)-Au(18)-Au(2)  | 119.90(3)  |
| Au(9)-Au(18)-Au(2)   | 116.05(2)  |
| Ag(17)-Au(18)-Ag(10) | 67.96(3)   |
| Au(1)-Au(18)-Ag(10)  | 142.69(3)  |
| Au(10)-Au(18)-Ag(10) | 59.60(2)   |
| Ag(16)-Au(18)-Ag(10) | 73.22(3)   |
| Au(9)-Au(18)-Ag(10)  | 134.37(3)  |
| Au(2)-Au(18)-Ag(10)  | 59.04(2)   |
| Ag(17)-Au(18)-Ag(7)  | 66.82(3)   |
| Au(1)-Au(18)-Ag(7)   | 60.66(2)   |
| Au(10)-Au(18)-Ag(7)  | 138.44(3)  |
| Ag(16)-Au(18)-Ag(7)  | 74.46(3)   |
| Au(9)-Au(18)-Ag(7)   | 57.70(2)   |
| Au(2)-Au(18)-Ag(7)   | 138.91(3)  |

|                      |             |
|----------------------|-------------|
| Ag(10)-Au(18)-Ag(7)  | 95.13(3)    |
| Ag(17)-Au(18)-Au(17) | 177.33(3)   |
| Au(1)-Au(18)-Au(17)  | 59.381(17)  |
| Au(10)-Au(18)-Au(17) | 60.411(16)  |
| Ag(16)-Au(18)-Au(17) | 57.41(2)    |
| Au(9)-Au(18)-Au(17)  | 111.29(2)   |
| Au(2)-Au(18)-Au(17)  | 109.02(2)   |
| Ag(10)-Au(18)-Au(17) | 112.61(2)   |
| Ag(7)-Au(18)-Au(17)  | 110.52(3)   |
| Ag(17)-Au(18)-Au(7)  | 60.22(2)    |
| Au(1)-Au(18)-Au(7)   | 108.466(19) |
| Au(10)-Au(18)-Au(7)  | 110.54(2)   |
| Ag(16)-Au(18)-Au(7)  | 177.62(3)   |
| Au(9)-Au(18)-Au(7)   | 58.885(15)  |
| Au(2)-Au(18)-Au(7)   | 58.044(16)  |
| Ag(10)-Au(18)-Au(7)  | 105.85(2)   |
| Ag(7)-Au(18)-Au(7)   | 107.86(2)   |
| Au(17)-Au(18)-Au(7)  | 121.56(2)   |
| Ag(17)-Au(18)-Ag(1)  | 117.90(3)   |
| Au(1)-Au(18)-Ag(1)   | 100.81(2)   |
| Au(10)-Au(18)-Ag(1)  | 60.93(2)    |
| Ag(16)-Au(18)-Ag(1)  | 115.28(3)   |
| Au(9)-Au(18)-Ag(1)   | 101.78(2)   |
| Au(2)-Au(18)-Ag(1)   | 56.55(2)    |
| Ag(10)-Au(18)-Ag(1)  | 107.61(3)   |
| Ag(7)-Au(18)-Ag(1)   | 156.93(3)   |
| Au(17)-Au(18)-Ag(1)  | 64.58(2)    |
| Au(7)-Au(18)-Ag(1)   | 62.77(2)    |
| Ag(17)-Au(18)-Ag(3)  | 117.32(3)   |
| Au(1)-Au(18)-Ag(3)   | 57.10(2)    |

|                      |            |
|----------------------|------------|
| Au(10)-Au(18)-Ag(3)  | 103.03(2)  |
| Ag(16)-Au(18)-Ag(3)  | 115.88(3)  |
| Au(9)-Au(18)-Ag(3)   | 60.32(2)   |
| Au(2)-Au(18)-Ag(3)   | 99.79(2)   |
| Ag(10)-Au(18)-Ag(3)  | 157.05(3)  |
| Ag(7)-Au(18)-Ag(3)   | 107.51(3)  |
| Au(17)-Au(18)-Ag(3)  | 63.25(2)   |
| Au(7)-Au(18)-Ag(3)   | 64.15(2)   |
| Ag(1)-Au(18)-Ag(3)   | 49.56(2)   |
| S(19)-Au(19)-S(17)   | 172.98(11) |
| S(19)-Au(19)-Ag(9)   | 101.60(8)  |
| S(17)-Au(19)-Ag(9)   | 75.61(8)   |
| S(19)-Au(19)-Au(11)  | 80.62(7)   |
| S(17)-Au(19)-Au(11)  | 102.58(7)  |
| Ag(9)-Au(19)-Au(11)  | 55.58(2)   |
| S(19)-Au(19)-Ag(12)  | 89.05(8)   |
| S(17)-Au(19)-Ag(12)  | 97.84(8)   |
| Ag(9)-Au(19)-Ag(12)  | 103.25(3)  |
| Au(11)-Au(19)-Ag(12) | 51.97(2)   |
| S(19)-Au(19)-Ag(15)  | 136.93(8)  |
| S(17)-Au(19)-Ag(15)  | 48.14(7)   |
| Ag(9)-Au(19)-Ag(15)  | 66.55(3)   |
| Au(11)-Au(19)-Ag(15) | 58.13(2)   |
| Ag(12)-Au(19)-Ag(15) | 57.00(2)   |
| S(30)-Au(20)-S(25)   | 173.18(12) |
| S(30)-Au(20)-Ag(11)  | 75.46(8)   |
| S(25)-Au(20)-Ag(11)  | 99.88(8)   |
| S(30)-Au(20)-Au(12)  | 102.27(8)  |
| S(25)-Au(20)-Au(12)  | 78.62(7)   |
| Ag(11)-Au(20)-Au(12) | 55.70(2)   |

|                      |            |
|----------------------|------------|
| S(30)-Au(20)-Ag(13)  | 97.49(8)   |
| S(25)-Au(20)-Ag(13)  | 88.42(8)   |
| Ag(11)-Au(20)-Ag(13) | 103.73(3)  |
| Au(12)-Au(20)-Ag(13) | 52.38(2)   |
| S(30)-Au(20)-Ag(20)  | 47.47(8)   |
| S(25)-Au(20)-Ag(20)  | 135.52(7)  |
| Ag(11)-Au(20)-Ag(20) | 66.60(3)   |
| Au(12)-Au(20)-Ag(20) | 58.443(19) |
| Ag(13)-Au(20)-Ag(20) | 57.40(2)   |
| S(7)-Au(21)-S(3)     | 173.97(11) |
| S(7)-Au(21)-Ag(10)   | 103.14(7)  |
| S(3)-Au(21)-Ag(10)   | 73.37(8)   |
| S(7)-Au(21)-Au(10)   | 79.31(7)   |
| S(3)-Au(21)-Au(10)   | 102.16(7)  |
| Ag(10)-Au(21)-Au(10) | 55.60(2)   |
| S(7)-Au(21)-Ag(14)   | 88.74(8)   |
| S(3)-Au(21)-Ag(14)   | 96.75(8)   |
| Ag(10)-Au(21)-Ag(14) | 101.68(3)  |
| Au(10)-Au(21)-Ag(14) | 51.59(2)   |
| S(7)-Au(21)-Ag(16)   | 135.64(7)  |
| S(3)-Au(21)-Ag(16)   | 47.67(7)   |
| Ag(10)-Au(21)-Ag(16) | 64.44(3)   |
| Au(10)-Au(21)-Ag(16) | 58.17(2)   |
| Ag(14)-Au(21)-Ag(16) | 56.14(2)   |
| S(7)-Au(21)-Ag(32)   | 48.82(7)   |
| S(3)-Au(21)-Ag(32)   | 127.48(8)  |
| Ag(10)-Au(21)-Ag(32) | 54.32(2)   |
| Au(10)-Au(21)-Ag(32) | 53.731(19) |
| Ag(14)-Au(21)-Ag(32) | 97.92(3)   |
| Ag(16)-Au(21)-Ag(32) | 105.23(2)  |

|                      |            |
|----------------------|------------|
| S(5)-Au(22)-S(2)     | 174.92(11) |
| S(5)-Au(22)-Ag(5)    | 105.51(8)  |
| S(2)-Au(22)-Ag(5)    | 74.61(8)   |
| S(5)-Au(22)-Au(8)    | 79.93(7)   |
| S(2)-Au(22)-Au(8)    | 103.99(8)  |
| Ag(5)-Au(22)-Au(8)   | 55.81(2)   |
| S(5)-Au(22)-Ag(6)    | 82.50(8)   |
| S(2)-Au(22)-Ag(6)    | 102.45(7)  |
| Ag(5)-Au(22)-Ag(6)   | 104.01(3)  |
| Au(8)-Au(22)-Ag(6)   | 51.83(2)   |
| S(5)-Au(22)-Ag(30)   | 50.34(8)   |
| S(2)-Au(22)-Ag(30)   | 129.44(8)  |
| Ag(5)-Au(22)-Ag(30)  | 55.18(3)   |
| Au(8)-Au(22)-Ag(30)  | 54.058(19) |
| Ag(6)-Au(22)-Ag(30)  | 95.51(3)   |
| S(5)-Au(22)-Ag(19)   | 135.85(7)  |
| S(2)-Au(22)-Ag(19)   | 49.00(8)   |
| Ag(5)-Au(22)-Ag(19)  | 65.75(3)   |
| Au(8)-Au(22)-Ag(19)  | 58.980(19) |
| Ag(6)-Au(22)-Ag(19)  | 60.34(2)   |
| Ag(30)-Au(22)-Ag(19) | 107.01(3)  |
| S(13)-Au(23)-S(29)   | 172.81(11) |
| S(13)-Au(23)-Au(3)   | 82.67(8)   |
| S(29)-Au(23)-Au(3)   | 101.23(8)  |
| S(13)-Au(23)-Ag(4)   | 106.74(8)  |
| S(29)-Au(23)-Ag(4)   | 71.06(8)   |
| Au(3)-Au(23)-Ag(4)   | 56.98(2)   |
| S(13)-Au(23)-Ag(8)   | 90.00(8)   |
| S(29)-Au(23)-Ag(8)   | 97.17(7)   |
| Au(3)-Au(23)-Ag(8)   | 52.936(19) |

|                      |            |
|----------------------|------------|
| Ag(4)-Au(23)-Ag(8)   | 104.17(3)  |
| S(13)-Au(23)-Ag(23)  | 50.92(8)   |
| S(29)-Au(23)-Ag(23)  | 126.72(8)  |
| Au(3)-Au(23)-Ag(23)  | 54.73(2)   |
| Ag(4)-Au(23)-Ag(23)  | 55.87(3)   |
| Ag(8)-Au(23)-Ag(23)  | 99.58(3)   |
| S(13)-Au(23)-Ag(29)  | 138.47(8)  |
| S(29)-Au(23)-Ag(29)  | 47.31(7)   |
| Au(3)-Au(23)-Ag(29)  | 57.98(2)   |
| Ag(4)-Au(23)-Ag(29)  | 64.46(3)   |
| Ag(8)-Au(23)-Ag(29)  | 56.95(2)   |
| Ag(23)-Au(23)-Ag(29) | 106.07(3)  |
| S(6)-Au(24)-S(14)    | 174.54(11) |
| S(6)-Au(24)-Ag(2)    | 104.38(8)  |
| S(14)-Au(24)-Ag(2)   | 73.11(8)   |
| S(6)-Au(24)-Au(9)    | 80.59(8)   |
| S(14)-Au(24)-Au(9)   | 101.47(7)  |
| Ag(2)-Au(24)-Au(9)   | 55.59(2)   |
| S(6)-Au(24)-Ag(7)    | 88.58(7)   |
| S(14)-Au(24)-Ag(7)   | 96.68(7)   |
| Ag(2)-Au(24)-Ag(7)   | 102.14(3)  |
| Au(9)-Au(24)-Ag(7)   | 51.831(19) |
| S(6)-Au(24)-Ag(21)   | 49.96(8)   |
| S(14)-Au(24)-Ag(21)  | 127.41(8)  |
| Ag(2)-Au(24)-Ag(21)  | 54.43(3)   |
| Au(9)-Au(24)-Ag(21)  | 53.404(19) |
| Ag(7)-Au(24)-Ag(21)  | 97.43(3)   |
| S(6)-Au(24)-Ag(17)   | 136.21(7)  |
| S(14)-Au(24)-Ag(17)  | 47.49(7)   |
| Ag(2)-Au(24)-Ag(17)  | 65.00(3)   |

|                      |           |
|----------------------|-----------|
| Au(9)-Au(24)-Ag(17)  | 57.92(2)  |
| Ag(7)-Au(24)-Ag(17)  | 56.00(2)  |
| Ag(21)-Au(24)-Ag(17) | 105.17(3) |
| C(135)-B(1)-C(129)   | 113.0(10) |
| C(135)-B(1)-C(141)   | 115.6(9)  |
| C(129)-B(1)-C(141)   | 109.4(9)  |
| C(135)-B(1)-C(147)   | 106.7(9)  |
| C(129)-B(1)-C(147)   | 105.8(9)  |
| C(141)-B(1)-C(147)   | 105.3(9)  |
| C(159)-B(2)-C(165)   | 110.4(10) |
| C(159)-B(2)-C(153)   | 115.7(10) |
| C(165)-B(2)-C(153)   | 107.3(9)  |
| C(159)-B(2)-C(171)   | 112.1(9)  |
| C(165)-B(2)-C(171)   | 107.9(9)  |
| C(153)-B(2)-C(171)   | 103.0(9)  |
| C(2)-C(1)-C(3)       | 109.7(10) |
| C(2)-C(1)-C(4)       | 98.6(11)  |
| C(3)-C(1)-C(4)       | 118.3(12) |
| C(2)-C(1)-S(1)       | 109.1(10) |
| C(3)-C(1)-S(1)       | 106.9(10) |
| C(4)-C(1)-S(1)       | 113.7(9)  |
| C(1)-C(2)-H(2A)      | 109.5     |
| C(1)-C(2)-H(2B)      | 109.5     |
| H(2A)-C(2)-H(2B)     | 109.5     |
| C(1)-C(2)-H(2C)      | 109.5     |
| H(2A)-C(2)-H(2C)     | 109.5     |
| H(2B)-C(2)-H(2C)     | 109.5     |
| C(1)-C(3)-H(3A)      | 109.5     |
| C(1)-C(3)-H(3B)      | 109.5     |
| H(3A)-C(3)-H(3B)     | 109.5     |

|                  |           |
|------------------|-----------|
| C(1)-C(3)-H(3C)  | 109.5     |
| H(3A)-C(3)-H(3C) | 109.5     |
| H(3B)-C(3)-H(3C) | 109.5     |
| C(1)-C(4)-H(4A)  | 109.5     |
| C(1)-C(4)-H(4B)  | 109.5     |
| H(4A)-C(4)-H(4B) | 109.5     |
| C(1)-C(4)-H(4C)  | 109.5     |
| H(4A)-C(4)-H(4C) | 109.5     |
| H(4B)-C(4)-H(4C) | 109.5     |
| C(7)-C(5)-C(6)   | 109.7(11) |
| C(7)-C(5)-C(8)   | 107.0(12) |
| C(6)-C(5)-C(8)   | 106.2(10) |
| C(7)-C(5)-S(2)   | 112.6(10) |
| C(6)-C(5)-S(2)   | 109.9(9)  |
| C(8)-C(5)-S(2)   | 111.2(9)  |
| C(5)-C(6)-H(6A)  | 109.5     |
| C(5)-C(6)-H(6B)  | 109.5     |
| H(6A)-C(6)-H(6B) | 109.5     |
| C(5)-C(6)-H(6C)  | 109.5     |
| H(6A)-C(6)-H(6C) | 109.5     |
| H(6B)-C(6)-H(6C) | 109.5     |
| C(5)-C(7)-H(7A)  | 109.5     |
| C(5)-C(7)-H(7B)  | 109.5     |
| H(7A)-C(7)-H(7B) | 109.5     |
| C(5)-C(7)-H(7C)  | 109.5     |
| H(7A)-C(7)-H(7C) | 109.5     |
| H(7B)-C(7)-H(7C) | 109.5     |
| C(5)-C(8)-H(8D)  | 109.5     |
| C(5)-C(8)-H(8E)  | 109.5     |
| H(8D)-C(8)-H(8E) | 109.5     |



|                     |           |
|---------------------|-----------|
| C(5)-C(8)-H(8F)     | 109.5     |
| H(8D)-C(8)-H(8F)    | 109.5     |
| H(8E)-C(8)-H(8F)    | 109.5     |
| C(11)-C(9)-C(10)    | 110.7(11) |
| C(11)-C(9)-C(12)    | 106.7(11) |
| C(10)-C(9)-C(12)    | 107.4(10) |
| C(11)-C(9)-S(3)     | 112.9(8)  |
| C(10)-C(9)-S(3)     | 110.4(9)  |
| C(12)-C(9)-S(3)     | 108.5(9)  |
| C(9)-C(10)-H(10A)   | 109.5     |
| C(9)-C(10)-H(10B)   | 109.5     |
| H(10A)-C(10)-H(10B) | 109.5     |
| C(9)-C(10)-H(10C)   | 109.5     |
| H(10A)-C(10)-H(10C) | 109.5     |
| H(10B)-C(10)-H(10C) | 109.5     |
| C(9)-C(11)-H(11A)   | 109.5     |
| C(9)-C(11)-H(11B)   | 109.5     |
| H(11A)-C(11)-H(11B) | 109.5     |
| C(9)-C(11)-H(11C)   | 109.5     |
| H(11A)-C(11)-H(11C) | 109.5     |
| H(11B)-C(11)-H(11C) | 109.5     |
| C(9)-C(12)-H(12A)   | 109.5     |
| C(9)-C(12)-H(12B)   | 109.5     |
| H(12A)-C(12)-H(12B) | 109.5     |
| C(9)-C(12)-H(12C)   | 109.5     |
| H(12A)-C(12)-H(12C) | 109.5     |
| H(12B)-C(12)-H(12C) | 109.5     |
| C(16)-C(13)-C(15)   | 107.4(11) |
| C(16)-C(13)-C(14)   | 104.3(12) |
| C(15)-C(13)-C(14)   | 111.3(12) |

|                     |           |
|---------------------|-----------|
| C(16)-C(13)-S(4)    | 110.0(10) |
| C(15)-C(13)-S(4)    | 114.6(9)  |
| C(14)-C(13)-S(4)    | 108.8(9)  |
| C(13)-C(14)-H(14A)  | 109.5     |
| C(13)-C(14)-H(14B)  | 109.5     |
| H(14A)-C(14)-H(14B) | 109.5     |
| C(13)-C(14)-H(14C)  | 109.5     |
| H(14A)-C(14)-H(14C) | 109.5     |
| H(14B)-C(14)-H(14C) | 109.5     |
| C(13)-C(15)-H(15A)  | 109.5     |
| C(13)-C(15)-H(15B)  | 109.5     |
| H(15A)-C(15)-H(15B) | 109.5     |
| C(13)-C(15)-H(15C)  | 109.5     |
| H(15A)-C(15)-H(15C) | 109.5     |
| H(15B)-C(15)-H(15C) | 109.5     |
| C(13)-C(16)-H(16A)  | 109.5     |
| C(13)-C(16)-H(16B)  | 109.5     |
| H(16A)-C(16)-H(16B) | 109.5     |
| C(13)-C(16)-H(16C)  | 109.5     |
| H(16A)-C(16)-H(16C) | 109.5     |
| H(16B)-C(16)-H(16C) | 109.5     |
| C(18)-C(17)-C(20)   | 115.1(11) |
| C(18)-C(17)-C(19)   | 106.7(11) |
| C(20)-C(17)-C(19)   | 104.4(11) |
| C(18)-C(17)-S(5)    | 108.1(8)  |
| C(20)-C(17)-S(5)    | 110.6(9)  |
| C(19)-C(17)-S(5)    | 111.9(9)  |
| C(17)-C(18)-H(18A)  | 109.5     |
| C(17)-C(18)-H(18B)  | 109.5     |
| H(18A)-C(18)-H(18B) | 109.5     |

|                     |           |
|---------------------|-----------|
| C(17)-C(18)-H(18C)  | 109.5     |
| H(18A)-C(18)-H(18C) | 109.5     |
| H(18B)-C(18)-H(18C) | 109.5     |
| C(17)-C(19)-H(19A)  | 109.5     |
| C(17)-C(19)-H(19B)  | 109.5     |
| H(19A)-C(19)-H(19B) | 109.5     |
| C(17)-C(19)-H(19C)  | 109.5     |
| H(19A)-C(19)-H(19C) | 109.5     |
| H(19B)-C(19)-H(19C) | 109.5     |
| C(17)-C(20)-H(20A)  | 109.5     |
| C(17)-C(20)-H(20B)  | 109.5     |
| H(20A)-C(20)-H(20B) | 109.5     |
| C(17)-C(20)-H(20C)  | 109.5     |
| H(20A)-C(20)-H(20C) | 109.5     |
| H(20B)-C(20)-H(20C) | 109.5     |
| C(22)-C(21)-C(23)   | 112.3(12) |
| C(22)-C(21)-C(24)   | 106.5(12) |
| C(23)-C(21)-C(24)   | 111.8(11) |
| C(22)-C(21)-S(6)    | 107.6(9)  |
| C(23)-C(21)-S(6)    | 113.8(9)  |
| C(24)-C(21)-S(6)    | 104.2(10) |
| C(21)-C(22)-H(22A)  | 109.5     |
| C(21)-C(22)-H(22B)  | 109.5     |
| H(22A)-C(22)-H(22B) | 109.5     |
| C(21)-C(22)-H(22C)  | 109.5     |
| H(22A)-C(22)-H(22C) | 109.5     |
| H(22B)-C(22)-H(22C) | 109.5     |
| C(21)-C(23)-H(23A)  | 109.5     |
| C(21)-C(23)-H(23B)  | 109.5     |
| H(23A)-C(23)-H(23B) | 109.5     |

|                     |           |
|---------------------|-----------|
| C(21)-C(23)-H(23C)  | 109.5     |
| H(23A)-C(23)-H(23C) | 109.5     |
| H(23B)-C(23)-H(23C) | 109.5     |
| C(21)-C(24)-H(24A)  | 109.5     |
| C(21)-C(24)-H(24B)  | 109.5     |
| H(24A)-C(24)-H(24B) | 109.5     |
| C(21)-C(24)-H(24C)  | 109.5     |
| H(24A)-C(24)-H(24C) | 109.5     |
| H(24B)-C(24)-H(24C) | 109.5     |
| C(26)-C(25)-C(28)   | 112.5(12) |
| C(26)-C(25)-C(27)   | 104.4(12) |
| C(28)-C(25)-C(27)   | 107.6(12) |
| C(26)-C(25)-S(7)    | 112.1(9)  |
| C(28)-C(25)-S(7)    | 109.9(9)  |
| C(27)-C(25)-S(7)    | 110.1(10) |
| C(25)-C(26)-H(26A)  | 109.5     |
| C(25)-C(26)-H(26B)  | 109.5     |
| H(26A)-C(26)-H(26B) | 109.5     |
| C(25)-C(26)-H(26C)  | 109.5     |
| H(26A)-C(26)-H(26C) | 109.5     |
| H(26B)-C(26)-H(26C) | 109.5     |
| C(25)-C(27)-H(27A)  | 109.5     |
| C(25)-C(27)-H(27B)  | 109.5     |
| H(27A)-C(27)-H(27B) | 109.5     |
| C(25)-C(27)-H(27C)  | 109.5     |
| H(27A)-C(27)-H(27C) | 109.5     |
| H(27B)-C(27)-H(27C) | 109.5     |
| C(25)-C(28)-H(28A)  | 109.5     |
| C(25)-C(28)-H(28B)  | 109.5     |
| H(28A)-C(28)-H(28B) | 109.5     |

|                     |           |
|---------------------|-----------|
| C(25)-C(28)-H(28C)  | 109.5     |
| H(28A)-C(28)-H(28C) | 109.5     |
| H(28B)-C(28)-H(28C) | 109.5     |
| C(30)-C(29)-C(32)   | 105.8(12) |
| C(30)-C(29)-C(31)   | 102.7(12) |
| C(32)-C(29)-C(31)   | 118.6(12) |
| C(30)-C(29)-S(8)    | 116.9(11) |
| C(32)-C(29)-S(8)    | 107.2(9)  |
| C(31)-C(29)-S(8)    | 106.2(9)  |
| C(29)-C(30)-H(30A)  | 109.5     |
| C(29)-C(30)-H(30B)  | 109.5     |
| H(30A)-C(30)-H(30B) | 109.5     |
| C(29)-C(30)-H(30C)  | 109.5     |
| H(30A)-C(30)-H(30C) | 109.5     |
| H(30B)-C(30)-H(30C) | 109.5     |
| C(29)-C(31)-H(31A)  | 109.5     |
| C(29)-C(31)-H(31B)  | 109.5     |
| H(31A)-C(31)-H(31B) | 109.5     |
| C(29)-C(31)-H(31C)  | 109.5     |
| H(31A)-C(31)-H(31C) | 109.5     |
| H(31B)-C(31)-H(31C) | 109.5     |
| C(29)-C(32)-H(32A)  | 109.5     |
| C(29)-C(32)-H(32B)  | 109.5     |
| H(32A)-C(32)-H(32B) | 109.5     |
| C(29)-C(32)-H(32C)  | 109.5     |
| H(32A)-C(32)-H(32C) | 109.5     |
| H(32B)-C(32)-H(32C) | 109.5     |
| C(35)-C(33)-C(36)   | 109.8(11) |
| C(35)-C(33)-C(34)   | 107.0(12) |
| C(36)-C(33)-C(34)   | 112.5(12) |

|                     |           |
|---------------------|-----------|
| C(35)-C(33)-S(9)    | 109.3(9)  |
| C(36)-C(33)-S(9)    | 108.6(9)  |
| C(34)-C(33)-S(9)    | 109.5(9)  |
| C(33)-C(34)-H(34A)  | 109.5     |
| C(33)-C(34)-H(34B)  | 109.5     |
| H(34A)-C(34)-H(34B) | 109.5     |
| C(33)-C(34)-H(34C)  | 109.5     |
| H(34A)-C(34)-H(34C) | 109.5     |
| H(34B)-C(34)-H(34C) | 109.5     |
| C(33)-C(35)-H(35A)  | 109.5     |
| C(33)-C(35)-H(35B)  | 109.5     |
| H(35A)-C(35)-H(35B) | 109.5     |
| C(33)-C(35)-H(35C)  | 109.5     |
| H(35A)-C(35)-H(35C) | 109.5     |
| H(35B)-C(35)-H(35C) | 109.5     |
| C(33)-C(36)-H(36A)  | 109.5     |
| C(33)-C(36)-H(36B)  | 109.5     |
| H(36A)-C(36)-H(36B) | 109.5     |
| C(33)-C(36)-H(36C)  | 109.5     |
| H(36A)-C(36)-H(36C) | 109.5     |
| H(36B)-C(36)-H(36C) | 109.5     |
| C(40)-C(37)-C(38)   | 110.2(12) |
| C(40)-C(37)-C(39)   | 113.6(12) |
| C(38)-C(37)-C(39)   | 111.1(11) |
| C(40)-C(37)-S(10)   | 106.6(8)  |
| C(38)-C(37)-S(10)   | 106.5(9)  |
| C(39)-C(37)-S(10)   | 108.5(9)  |
| C(37)-C(38)-H(38A)  | 109.5     |
| C(37)-C(38)-H(38B)  | 109.5     |
| H(38A)-C(38)-H(38B) | 109.5     |

|                     |           |
|---------------------|-----------|
| C(37)-C(38)-H(38C)  | 109.5     |
| H(38A)-C(38)-H(38C) | 109.5     |
| H(38B)-C(38)-H(38C) | 109.5     |
| C(37)-C(39)-H(39A)  | 109.5     |
| C(37)-C(39)-H(39B)  | 109.5     |
| H(39A)-C(39)-H(39B) | 109.5     |
| C(37)-C(39)-H(39C)  | 109.5     |
| H(39A)-C(39)-H(39C) | 109.5     |
| H(39B)-C(39)-H(39C) | 109.5     |
| C(37)-C(40)-H(40A)  | 109.5     |
| C(37)-C(40)-H(40B)  | 109.5     |
| H(40A)-C(40)-H(40B) | 109.5     |
| C(37)-C(40)-H(40C)  | 109.5     |
| H(40A)-C(40)-H(40C) | 109.5     |
| H(40B)-C(40)-H(40C) | 109.5     |
| C(44)-C(41)-C(43)   | 105.6(11) |
| C(44)-C(41)-C(42)   | 120.1(12) |
| C(43)-C(41)-C(42)   | 109.6(11) |
| C(44)-C(41)-S(11)   | 107.5(10) |
| C(43)-C(41)-S(11)   | 106.7(10) |
| C(42)-C(41)-S(11)   | 106.8(8)  |
| C(41)-C(42)-H(42A)  | 109.5     |
| C(41)-C(42)-H(42B)  | 109.5     |
| H(42A)-C(42)-H(42B) | 109.5     |
| C(41)-C(42)-H(42C)  | 109.5     |
| H(42A)-C(42)-H(42C) | 109.5     |
| H(42B)-C(42)-H(42C) | 109.5     |
| C(41)-C(43)-H(43A)  | 109.5     |
| C(41)-C(43)-H(43B)  | 109.5     |
| H(43A)-C(43)-H(43B) | 109.5     |

|                     |           |
|---------------------|-----------|
| C(41)-C(43)-H(43C)  | 109.5     |
| H(43A)-C(43)-H(43C) | 109.5     |
| H(43B)-C(43)-H(43C) | 109.5     |
| C(41)-C(44)-H(44A)  | 109.5     |
| C(41)-C(44)-H(44B)  | 109.5     |
| H(44A)-C(44)-H(44B) | 109.5     |
| C(41)-C(44)-H(44C)  | 109.5     |
| H(44A)-C(44)-H(44C) | 109.5     |
| H(44B)-C(44)-H(44C) | 109.5     |
| C(47)-C(45)-C(46)   | 105.0(11) |
| C(47)-C(45)-C(48)   | 105.4(12) |
| C(46)-C(45)-C(48)   | 112.2(13) |
| C(47)-C(45)-S(12)   | 115.8(11) |
| C(46)-C(45)-S(12)   | 110.3(9)  |
| C(48)-C(45)-S(12)   | 108.1(10) |
| C(45)-C(46)-H(46A)  | 109.5     |
| C(45)-C(46)-H(46B)  | 109.5     |
| H(46A)-C(46)-H(46B) | 109.5     |
| C(45)-C(46)-H(46C)  | 109.5     |
| H(46A)-C(46)-H(46C) | 109.5     |
| H(46B)-C(46)-H(46C) | 109.5     |
| C(45)-C(47)-H(47A)  | 109.5     |
| C(45)-C(47)-H(47B)  | 109.5     |
| H(47A)-C(47)-H(47B) | 109.5     |
| C(45)-C(47)-H(47C)  | 109.5     |
| H(47A)-C(47)-H(47C) | 109.5     |
| H(47B)-C(47)-H(47C) | 109.5     |
| C(45)-C(48)-H(48A)  | 109.5     |
| C(45)-C(48)-H(48B)  | 109.5     |
| H(48A)-C(48)-H(48B) | 109.5     |



|                     |           |
|---------------------|-----------|
| C(45)-C(48)-H(48C)  | 109.5     |
| H(48A)-C(48)-H(48C) | 109.5     |
| H(48B)-C(48)-H(48C) | 109.5     |
| C(51)-C(49)-C(50)   | 101.4(11) |
| C(51)-C(49)-C(52)   | 108.8(11) |
| C(50)-C(49)-C(52)   | 109.0(10) |
| C(51)-C(49)-S(13)   | 112.6(9)  |
| C(50)-C(49)-S(13)   | 111.7(9)  |
| C(52)-C(49)-S(13)   | 112.6(9)  |
| C(49)-C(50)-H(50A)  | 109.5     |
| C(49)-C(50)-H(50B)  | 109.5     |
| H(50A)-C(50)-H(50B) | 109.5     |
| C(49)-C(50)-H(50C)  | 109.5     |
| H(50A)-C(50)-H(50C) | 109.5     |
| H(50B)-C(50)-H(50C) | 109.5     |
| C(49)-C(51)-H(51A)  | 109.5     |
| C(49)-C(51)-H(51B)  | 109.5     |
| H(51A)-C(51)-H(51B) | 109.5     |
| C(49)-C(51)-H(51C)  | 109.5     |
| H(51A)-C(51)-H(51C) | 109.5     |
| H(51B)-C(51)-H(51C) | 109.5     |
| C(49)-C(52)-H(52A)  | 109.5     |
| C(49)-C(52)-H(52B)  | 109.5     |
| H(52A)-C(52)-H(52B) | 109.5     |
| C(49)-C(52)-H(52C)  | 109.5     |
| H(52A)-C(52)-H(52C) | 109.5     |
| H(52B)-C(52)-H(52C) | 109.5     |
| C(55)-C(53)-C(56)   | 112.7(12) |
| C(55)-C(53)-C(54)   | 108.7(11) |
| C(56)-C(53)-C(54)   | 107.9(11) |

|                     |           |
|---------------------|-----------|
| C(55)-C(53)-S(14)   | 107.7(9)  |
| C(56)-C(53)-S(14)   | 111.7(9)  |
| C(54)-C(53)-S(14)   | 108.1(9)  |
| C(53)-C(54)-H(54A)  | 109.5     |
| C(53)-C(54)-H(54B)  | 109.5     |
| H(54A)-C(54)-H(54B) | 109.5     |
| C(53)-C(54)-H(54C)  | 109.5     |
| H(54A)-C(54)-H(54C) | 109.5     |
| H(54B)-C(54)-H(54C) | 109.5     |
| C(53)-C(55)-H(55A)  | 109.5     |
| C(53)-C(55)-H(55B)  | 109.5     |
| H(55A)-C(55)-H(55B) | 109.5     |
| C(53)-C(55)-H(55C)  | 109.5     |
| H(55A)-C(55)-H(55C) | 109.5     |
| H(55B)-C(55)-H(55C) | 109.5     |
| C(53)-C(56)-H(56A)  | 109.5     |
| C(53)-C(56)-H(56B)  | 109.5     |
| H(56A)-C(56)-H(56B) | 109.5     |
| C(53)-C(56)-H(56C)  | 109.5     |
| H(56A)-C(56)-H(56C) | 109.5     |
| H(56B)-C(56)-H(56C) | 109.5     |
| C(60)-C(57)-C(58)   | 110.7(11) |
| C(60)-C(57)-C(59)   | 109.9(10) |
| C(58)-C(57)-C(59)   | 109.3(11) |
| C(60)-C(57)-S(15)   | 108.0(9)  |
| C(58)-C(57)-S(15)   | 112.8(9)  |
| C(59)-C(57)-S(15)   | 105.9(9)  |
| C(57)-C(58)-H(58A)  | 109.5     |
| C(57)-C(58)-H(58B)  | 109.5     |
| H(58A)-C(58)-H(58B) | 109.5     |

|                     |           |
|---------------------|-----------|
| C(57)-C(58)-H(58C)  | 109.5     |
| H(58A)-C(58)-H(58C) | 109.5     |
| H(58B)-C(58)-H(58C) | 109.5     |
| C(57)-C(59)-H(59A)  | 109.5     |
| C(57)-C(59)-H(59B)  | 109.5     |
| H(59A)-C(59)-H(59B) | 109.5     |
| C(57)-C(59)-H(59C)  | 109.5     |
| H(59A)-C(59)-H(59C) | 109.5     |
| H(59B)-C(59)-H(59C) | 109.5     |
| C(57)-C(60)-H(60A)  | 109.5     |
| C(57)-C(60)-H(60B)  | 109.5     |
| H(60A)-C(60)-H(60B) | 109.5     |
| C(57)-C(60)-H(60C)  | 109.5     |
| H(60A)-C(60)-H(60C) | 109.5     |
| H(60B)-C(60)-H(60C) | 109.5     |
| C(62)-C(61)-C(63)   | 106.4(12) |
| C(62)-C(61)-C(64)   | 111.9(11) |
| C(63)-C(61)-C(64)   | 108.4(11) |
| C(62)-C(61)-S(16)   | 112.3(9)  |
| C(63)-C(61)-S(16)   | 108.7(9)  |
| C(64)-C(61)-S(16)   | 109.1(9)  |
| C(61)-C(62)-H(62A)  | 109.5     |
| C(61)-C(62)-H(62B)  | 109.5     |
| H(62A)-C(62)-H(62B) | 109.5     |
| C(61)-C(62)-H(62C)  | 109.5     |
| H(62A)-C(62)-H(62C) | 109.5     |
| H(62B)-C(62)-H(62C) | 109.5     |
| C(61)-C(63)-H(63A)  | 109.5     |
| C(61)-C(63)-H(63B)  | 109.5     |
| H(63A)-C(63)-H(63B) | 109.5     |

|                     |           |
|---------------------|-----------|
| C(61)-C(63)-H(63C)  | 109.5     |
| H(63A)-C(63)-H(63C) | 109.5     |
| H(63B)-C(63)-H(63C) | 109.5     |
| C(61)-C(64)-H(64A)  | 109.5     |
| C(61)-C(64)-H(64B)  | 109.5     |
| H(64A)-C(64)-H(64B) | 109.5     |
| C(61)-C(64)-H(64C)  | 109.5     |
| H(64A)-C(64)-H(64C) | 109.5     |
| H(64B)-C(64)-H(64C) | 109.5     |
| C(66)-C(65)-C(67)   | 114.5(12) |
| C(66)-C(65)-C(68)   | 111.2(11) |
| C(67)-C(65)-C(68)   | 111.6(11) |
| C(66)-C(65)-S(17)   | 109.6(9)  |
| C(67)-C(65)-S(17)   | 103.8(9)  |
| C(68)-C(65)-S(17)   | 105.3(9)  |
| C(65)-C(66)-H(66A)  | 109.5     |
| C(65)-C(66)-H(66B)  | 109.5     |
| H(66A)-C(66)-H(66B) | 109.5     |
| C(65)-C(66)-H(66C)  | 109.5     |
| H(66A)-C(66)-H(66C) | 109.5     |
| H(66B)-C(66)-H(66C) | 109.5     |
| C(65)-C(67)-H(67A)  | 109.5     |
| C(65)-C(67)-H(67B)  | 109.5     |
| H(67A)-C(67)-H(67B) | 109.5     |
| C(65)-C(67)-H(67C)  | 109.5     |
| H(67A)-C(67)-H(67C) | 109.5     |
| H(67B)-C(67)-H(67C) | 109.5     |
| C(65)-C(68)-H(68A)  | 109.5     |
| C(65)-C(68)-H(68B)  | 109.5     |
| H(68A)-C(68)-H(68B) | 109.5     |

|                     |           |
|---------------------|-----------|
| C(65)-C(68)-H(68C)  | 109.5     |
| H(68A)-C(68)-H(68C) | 109.5     |
| H(68B)-C(68)-H(68C) | 109.5     |
| C(72)-C(69)-C(71)   | 107.4(11) |
| C(72)-C(69)-C(70)   | 107.1(11) |
| C(71)-C(69)-C(70)   | 105.0(12) |
| C(72)-C(69)-S(18)   | 111.6(10) |
| C(71)-C(69)-S(18)   | 115.8(11) |
| C(70)-C(69)-S(18)   | 109.4(9)  |
| C(69)-C(70)-H(70A)  | 109.5     |
| C(69)-C(70)-H(70B)  | 109.5     |
| H(70A)-C(70)-H(70B) | 109.5     |
| C(69)-C(70)-H(70C)  | 109.5     |
| H(70A)-C(70)-H(70C) | 109.5     |
| H(70B)-C(70)-H(70C) | 109.5     |
| C(69)-C(71)-H(71A)  | 109.5     |
| C(69)-C(71)-H(71B)  | 109.5     |
| H(71A)-C(71)-H(71B) | 109.5     |
| C(69)-C(71)-H(71C)  | 109.5     |
| H(71A)-C(71)-H(71C) | 109.5     |
| H(71B)-C(71)-H(71C) | 109.5     |
| C(69)-C(72)-H(72A)  | 109.5     |
| C(69)-C(72)-H(72B)  | 109.5     |
| H(72A)-C(72)-H(72B) | 109.5     |
| C(69)-C(72)-H(72C)  | 109.5     |
| H(72A)-C(72)-H(72C) | 109.5     |
| H(72B)-C(72)-H(72C) | 109.5     |
| C(75)-C(73)-C(76)   | 113.0(12) |
| C(75)-C(73)-C(74)   | 115.2(12) |
| C(76)-C(73)-C(74)   | 101.2(11) |

|                     |           |
|---------------------|-----------|
| C(75)-C(73)-S(19)   | 106.9(9)  |
| C(76)-C(73)-S(19)   | 108.4(9)  |
| C(74)-C(73)-S(19)   | 112.1(9)  |
| C(73)-C(74)-H(74A)  | 109.5     |
| C(73)-C(74)-H(74B)  | 109.5     |
| H(74A)-C(74)-H(74B) | 109.5     |
| C(73)-C(74)-H(74C)  | 109.5     |
| H(74A)-C(74)-H(74C) | 109.5     |
| H(74B)-C(74)-H(74C) | 109.5     |
| C(73)-C(75)-H(75A)  | 109.5     |
| C(73)-C(75)-H(75B)  | 109.5     |
| H(75A)-C(75)-H(75B) | 109.5     |
| C(73)-C(75)-H(75C)  | 109.5     |
| H(75A)-C(75)-H(75C) | 109.5     |
| H(75B)-C(75)-H(75C) | 109.5     |
| C(73)-C(76)-H(76A)  | 109.5     |
| C(73)-C(76)-H(76B)  | 109.5     |
| H(76A)-C(76)-H(76B) | 109.5     |
| C(73)-C(76)-H(76C)  | 109.5     |
| H(76A)-C(76)-H(76C) | 109.5     |
| H(76B)-C(76)-H(76C) | 109.5     |
| C(79)-C(77)-C(78)   | 105.5(12) |
| C(79)-C(77)-C(80)   | 109.3(11) |
| C(78)-C(77)-C(80)   | 109.7(11) |
| C(79)-C(77)-S(20)   | 112.7(10) |
| C(78)-C(77)-S(20)   | 109.1(8)  |
| C(80)-C(77)-S(20)   | 110.4(9)  |
| C(77)-C(78)-H(78A)  | 109.5     |
| C(77)-C(78)-H(78B)  | 109.5     |
| H(78A)-C(78)-H(78B) | 109.5     |

|                     |           |
|---------------------|-----------|
| C(77)-C(78)-H(78C)  | 109.5     |
| H(78A)-C(78)-H(78C) | 109.5     |
| H(78B)-C(78)-H(78C) | 109.5     |
| C(77)-C(79)-H(79A)  | 109.5     |
| C(77)-C(79)-H(79B)  | 109.5     |
| H(79A)-C(79)-H(79B) | 109.5     |
| C(77)-C(79)-H(79C)  | 109.5     |
| H(79A)-C(79)-H(79C) | 109.5     |
| H(79B)-C(79)-H(79C) | 109.5     |
| C(77)-C(80)-H(80A)  | 109.5     |
| C(77)-C(80)-H(80B)  | 109.5     |
| H(80A)-C(80)-H(80B) | 109.5     |
| C(77)-C(80)-H(80C)  | 109.5     |
| H(80A)-C(80)-H(80C) | 109.5     |
| H(80B)-C(80)-H(80C) | 109.5     |
| C(82)-C(81)-C(83)   | 108.7(12) |
| C(82)-C(81)-C(84)   | 106.4(12) |
| C(83)-C(81)-C(84)   | 111.6(12) |
| C(82)-C(81)-S(21)   | 112.6(10) |
| C(83)-C(81)-S(21)   | 109.4(10) |
| C(84)-C(81)-S(21)   | 108.1(10) |
| C(81)-C(82)-H(82A)  | 109.5     |
| C(81)-C(82)-H(82B)  | 109.5     |
| H(82A)-C(82)-H(82B) | 109.5     |
| C(81)-C(82)-H(82C)  | 109.5     |
| H(82A)-C(82)-H(82C) | 109.5     |
| H(82B)-C(82)-H(82C) | 109.5     |
| C(81)-C(83)-H(83A)  | 109.5     |
| C(81)-C(83)-H(83B)  | 109.5     |
| H(83A)-C(83)-H(83B) | 109.5     |

|                     |           |
|---------------------|-----------|
| C(81)-C(83)-H(83C)  | 109.5     |
| H(83A)-C(83)-H(83C) | 109.5     |
| H(83B)-C(83)-H(83C) | 109.5     |
| C(81)-C(84)-H(84A)  | 109.5     |
| C(81)-C(84)-H(84B)  | 109.5     |
| H(84A)-C(84)-H(84B) | 109.5     |
| C(81)-C(84)-H(84C)  | 109.5     |
| H(84A)-C(84)-H(84C) | 109.5     |
| H(84B)-C(84)-H(84C) | 109.5     |
| C(88)-C(85)-C(86)   | 112.8(11) |
| C(88)-C(85)-C(87)   | 110.3(11) |
| C(86)-C(85)-C(87)   | 101.1(12) |
| C(88)-C(85)-S(22)   | 110.9(10) |
| C(86)-C(85)-S(22)   | 112.0(10) |
| C(87)-C(85)-S(22)   | 109.3(10) |
| C(85)-C(86)-H(86A)  | 109.5     |
| C(85)-C(86)-H(86B)  | 109.5     |
| H(86A)-C(86)-H(86B) | 109.5     |
| C(85)-C(86)-H(86C)  | 109.5     |
| H(86A)-C(86)-H(86C) | 109.5     |
| H(86B)-C(86)-H(86C) | 109.5     |
| C(85)-C(87)-H(87A)  | 109.5     |
| C(85)-C(87)-H(87B)  | 109.5     |
| H(87A)-C(87)-H(87B) | 109.5     |
| C(85)-C(87)-H(87C)  | 109.5     |
| H(87A)-C(87)-H(87C) | 109.5     |
| H(87B)-C(87)-H(87C) | 109.5     |
| C(85)-C(88)-H(88A)  | 109.5     |
| C(85)-C(88)-H(88B)  | 109.5     |
| H(88A)-C(88)-H(88B) | 109.5     |



|                     |           |
|---------------------|-----------|
| C(85)-C(88)-H(88C)  | 109.5     |
| H(88A)-C(88)-H(88C) | 109.5     |
| H(88B)-C(88)-H(88C) | 109.5     |
| C(91)-C(89)-C(92)   | 113.7(11) |
| C(91)-C(89)-C(90)   | 115.4(12) |
| C(92)-C(89)-C(90)   | 107.7(11) |
| C(91)-C(89)-S(23)   | 107.8(9)  |
| C(92)-C(89)-S(23)   | 110.4(9)  |
| C(90)-C(89)-S(23)   | 101.2(8)  |
| C(89)-C(90)-H(90A)  | 109.5     |
| C(89)-C(90)-H(90B)  | 109.5     |
| H(90A)-C(90)-H(90B) | 109.5     |
| C(89)-C(90)-H(90C)  | 109.5     |
| H(90A)-C(90)-H(90C) | 109.5     |
| H(90B)-C(90)-H(90C) | 109.5     |
| C(89)-C(91)-H(91A)  | 109.5     |
| C(89)-C(91)-H(91B)  | 109.5     |
| H(91A)-C(91)-H(91B) | 109.5     |
| C(89)-C(91)-H(91C)  | 109.5     |
| H(91A)-C(91)-H(91C) | 109.5     |
| H(91B)-C(91)-H(91C) | 109.5     |
| C(89)-C(92)-H(92A)  | 109.5     |
| C(89)-C(92)-H(92B)  | 109.5     |
| H(92A)-C(92)-H(92B) | 109.5     |
| C(89)-C(92)-H(92C)  | 109.5     |
| H(92A)-C(92)-H(92C) | 109.5     |
| H(92B)-C(92)-H(92C) | 109.5     |
| C(95)-C(93)-C(94)   | 108.3(12) |
| C(95)-C(93)-C(96)   | 110.3(11) |
| C(94)-C(93)-C(96)   | 109.9(11) |

|                     |           |
|---------------------|-----------|
| C(95)-C(93)-S(24)   | 109.4(10) |
| C(94)-C(93)-S(24)   | 112.3(9)  |
| C(96)-C(93)-S(24)   | 106.7(10) |
| C(93)-C(94)-H(94A)  | 109.5     |
| C(93)-C(94)-H(94B)  | 109.5     |
| H(94A)-C(94)-H(94B) | 109.5     |
| C(93)-C(94)-H(94C)  | 109.5     |
| H(94A)-C(94)-H(94C) | 109.5     |
| H(94B)-C(94)-H(94C) | 109.5     |
| C(93)-C(95)-H(95A)  | 109.5     |
| C(93)-C(95)-H(95B)  | 109.5     |
| H(95A)-C(95)-H(95B) | 109.5     |
| C(93)-C(95)-H(95C)  | 109.5     |
| H(95A)-C(95)-H(95C) | 109.5     |
| H(95B)-C(95)-H(95C) | 109.5     |
| C(93)-C(96)-H(96A)  | 109.5     |
| C(93)-C(96)-H(96B)  | 109.5     |
| H(96A)-C(96)-H(96B) | 109.5     |
| C(93)-C(96)-H(96C)  | 109.5     |
| H(96A)-C(96)-H(96C) | 109.5     |
| H(96B)-C(96)-H(96C) | 109.5     |
| C(99)-C(97)-C(98)   | 110.9(11) |
| C(99)-C(97)-C(100)  | 117.0(12) |
| C(98)-C(97)-C(100)  | 103.0(11) |
| C(99)-C(97)-S(25)   | 107.1(9)  |
| C(98)-C(97)-S(25)   | 111.0(9)  |
| C(100)-C(97)-S(25)  | 107.8(9)  |
| C(97)-C(98)-H(98A)  | 109.5     |
| C(97)-C(98)-H(98B)  | 109.5     |
| H(98A)-C(98)-H(98B) | 109.5     |

|                      |           |
|----------------------|-----------|
| C(97)-C(98)-H(98C)   | 109.5     |
| H(98A)-C(98)-H(98C)  | 109.5     |
| H(98B)-C(98)-H(98C)  | 109.5     |
| C(97)-C(99)-H(99A)   | 109.5     |
| C(97)-C(99)-H(99B)   | 109.5     |
| H(99A)-C(99)-H(99B)  | 109.5     |
| C(97)-C(99)-H(99C)   | 109.5     |
| H(99A)-C(99)-H(99C)  | 109.5     |
| H(99B)-C(99)-H(99C)  | 109.5     |
| C(97)-C(100)-H(10D)  | 109.5     |
| C(97)-C(100)-H(10E)  | 109.5     |
| H(10D)-C(100)-H(10E) | 109.5     |
| C(97)-C(100)-H(10F)  | 109.5     |
| H(10D)-C(100)-H(10F) | 109.5     |
| H(10E)-C(100)-H(10F) | 109.5     |
| C(102)-C(101)-C(104) | 108.3(12) |
| C(102)-C(101)-C(103) | 105.9(11) |
| C(104)-C(101)-C(103) | 98.5(11)  |
| C(102)-C(101)-S(26)  | 117.1(10) |
| C(104)-C(101)-S(26)  | 108.0(9)  |
| C(103)-C(101)-S(26)  | 117.2(10) |
| C(101)-C(102)-H(10G) | 109.5     |
| C(101)-C(102)-H(10H) | 109.5     |
| H(10G)-C(102)-H(10H) | 109.5     |
| C(101)-C(102)-H(10I) | 109.5     |
| H(10G)-C(102)-H(10I) | 109.5     |
| H(10H)-C(102)-H(10I) | 109.5     |
| C(101)-C(103)-H(10J) | 109.5     |
| C(101)-C(103)-H(10K) | 109.5     |
| H(10J)-C(103)-H(10K) | 109.5     |

|                      |           |
|----------------------|-----------|
| C(101)-C(103)-H(10L) | 109.5     |
| H(10J)-C(103)-H(10L) | 109.5     |
| H(10K)-C(103)-H(10L) | 109.5     |
| C(101)-C(104)-H(10M) | 109.5     |
| C(101)-C(104)-H(10N) | 109.5     |
| H(10M)-C(104)-H(10N) | 109.5     |
| C(101)-C(104)-H(10O) | 109.5     |
| H(10M)-C(104)-H(10O) | 109.5     |
| H(10N)-C(104)-H(10O) | 109.5     |
| C(106)-C(105)-C(107) | 104.8(13) |
| C(106)-C(105)-C(108) | 116.0(12) |
| C(107)-C(105)-C(108) | 112.5(12) |
| C(106)-C(105)-S(27)  | 105.0(10) |
| C(107)-C(105)-S(27)  | 108.8(9)  |
| C(108)-C(105)-S(27)  | 109.3(10) |
| C(105)-C(106)-H(10P) | 109.5     |
| C(105)-C(106)-H(10Q) | 109.5     |
| H(10P)-C(106)-H(10Q) | 109.5     |
| C(105)-C(106)-H(10R) | 109.5     |
| H(10P)-C(106)-H(10R) | 109.5     |
| H(10Q)-C(106)-H(10R) | 109.5     |
| C(105)-C(107)-H(10S) | 109.5     |
| C(105)-C(107)-H(10T) | 109.5     |
| H(10S)-C(107)-H(10T) | 109.5     |
| C(105)-C(107)-H(10U) | 109.5     |
| H(10S)-C(107)-H(10U) | 109.5     |
| H(10T)-C(107)-H(10U) | 109.5     |
| C(105)-C(108)-H(10V) | 109.5     |
| C(105)-C(108)-H(10W) | 109.5     |
| H(10V)-C(108)-H(10W) | 109.5     |

|                       |           |
|-----------------------|-----------|
| C(105)-C(108)-H(10\$) | 109.5     |
| H(10V)-C(108)-H(10\$) | 109.5     |
| H(10W)-C(108)-H(10\$) | 109.5     |
| C(112)-C(109)-C(110)  | 115.0(12) |
| C(112)-C(109)-C(111)  | 102.9(12) |
| C(110)-C(109)-C(111)  | 103.4(11) |
| C(112)-C(109)-S(28)   | 110.0(9)  |
| C(110)-C(109)-S(28)   | 115.9(10) |
| C(111)-C(109)-S(28)   | 108.3(9)  |
| C(109)-C(110)-H(11D)  | 109.5     |
| C(109)-C(110)-H(11E)  | 109.5     |
| H(11D)-C(110)-H(11E)  | 109.5     |
| C(109)-C(110)-H(11F)  | 109.5     |
| H(11D)-C(110)-H(11F)  | 109.5     |
| H(11E)-C(110)-H(11F)  | 109.5     |
| C(109)-C(111)-H(11G)  | 109.5     |
| C(109)-C(111)-H(11H)  | 109.5     |
| H(11G)-C(111)-H(11H)  | 109.5     |
| C(109)-C(111)-H(11I)  | 109.5     |
| H(11G)-C(111)-H(11I)  | 109.5     |
| H(11H)-C(111)-H(11I)  | 109.5     |
| C(109)-C(112)-H(11J)  | 109.5     |
| C(109)-C(112)-H(11K)  | 109.5     |
| H(11J)-C(112)-H(11K)  | 109.5     |
| C(109)-C(112)-H(11L)  | 109.5     |
| H(11J)-C(112)-H(11L)  | 109.5     |
| H(11K)-C(112)-H(11L)  | 109.5     |
| C(116)-C(113)-C(115)  | 107.2(13) |
| C(116)-C(113)-C(114)  | 104.8(12) |
| C(115)-C(113)-C(114)  | 106.3(11) |

|                      |           |
|----------------------|-----------|
| C(116)-C(113)-S(29)  | 115.8(9)  |
| C(115)-C(113)-S(29)  | 113.0(10) |
| C(114)-C(113)-S(29)  | 109.0(10) |
| C(113)-C(114)-H(11M) | 109.5     |
| C(113)-C(114)-H(11N) | 109.5     |
| H(11M)-C(114)-H(11N) | 109.5     |
| C(113)-C(114)-H(11O) | 109.5     |
| H(11M)-C(114)-H(11O) | 109.5     |
| H(11N)-C(114)-H(11O) | 109.5     |
| C(113)-C(115)-H(11P) | 109.5     |
| C(113)-C(115)-H(11Q) | 109.5     |
| H(11P)-C(115)-H(11Q) | 109.5     |
| C(113)-C(115)-H(11R) | 109.5     |
| H(11P)-C(115)-H(11R) | 109.5     |
| H(11Q)-C(115)-H(11R) | 109.5     |
| C(113)-C(116)-H(11S) | 109.5     |
| C(113)-C(116)-H(11T) | 109.5     |
| H(11S)-C(116)-H(11T) | 109.5     |
| C(113)-C(116)-H(11U) | 109.5     |
| H(11S)-C(116)-H(11U) | 109.5     |
| H(11T)-C(116)-H(11U) | 109.5     |
| C(118)-C(117)-C(119) | 110.6(12) |
| C(118)-C(117)-C(120) | 102.3(11) |
| C(119)-C(117)-C(120) | 115.6(12) |
| C(118)-C(117)-S(30)  | 113.4(9)  |
| C(119)-C(117)-S(30)  | 108.3(8)  |
| C(120)-C(117)-S(30)  | 106.5(9)  |
| C(117)-C(118)-H(11V) | 109.5     |
| C(117)-C(118)-H(11W) | 109.5     |
| H(11V)-C(118)-H(11W) | 109.5     |

|                       |           |
|-----------------------|-----------|
| C(117)-C(118)-H(111)  | 109.5     |
| H(11V)-C(118)-H(111)  | 109.5     |
| H(11W)-C(118)-H(111)  | 109.5     |
| C(117)-C(119)-H(11\$) | 109.5     |
| C(117)-C(119)-H(112)  | 109.5     |
| H(11\$)-C(119)-H(112) | 109.5     |
| C(117)-C(119)-H(113)  | 109.5     |
| H(11\$)-C(119)-H(113) | 109.5     |
| H(112)-C(119)-H(113)  | 109.5     |
| C(117)-C(120)-H(12D)  | 109.5     |
| C(117)-C(120)-H(12E)  | 109.5     |
| H(12D)-C(120)-H(12E)  | 109.5     |
| C(117)-C(120)-H(12F)  | 109.5     |
| H(12D)-C(120)-H(12F)  | 109.5     |
| H(12E)-C(120)-H(12F)  | 109.5     |
| C(123)-C(121)-C(122)  | 115.8(12) |
| C(123)-C(121)-C(124)  | 114.2(12) |
| C(122)-C(121)-C(124)  | 104.1(11) |
| C(123)-C(121)-S(31)   | 106.5(10) |
| C(122)-C(121)-S(31)   | 109.8(9)  |
| C(124)-C(121)-S(31)   | 106.0(9)  |
| C(121)-C(122)-H(12G)  | 109.5     |
| C(121)-C(122)-H(12H)  | 109.5     |
| H(12G)-C(122)-H(12H)  | 109.5     |
| C(121)-C(122)-H(12I)  | 109.5     |
| H(12G)-C(122)-H(12I)  | 109.5     |
| H(12H)-C(122)-H(12I)  | 109.5     |
| C(121)-C(123)-H(12J)  | 109.5     |
| C(121)-C(123)-H(12K)  | 109.5     |
| H(12J)-C(123)-H(12K)  | 109.5     |

|                      |           |
|----------------------|-----------|
| C(121)-C(123)-H(12L) | 109.5     |
| H(12J)-C(123)-H(12L) | 109.5     |
| H(12K)-C(123)-H(12L) | 109.5     |
| C(121)-C(124)-H(12M) | 109.5     |
| C(121)-C(124)-H(12N) | 109.5     |
| H(12M)-C(124)-H(12N) | 109.5     |
| C(121)-C(124)-H(12O) | 109.5     |
| H(12M)-C(124)-H(12O) | 109.5     |
| H(12N)-C(124)-H(12O) | 109.5     |
| C(126)-C(125)-C(128) | 109.2(11) |
| C(126)-C(125)-C(127) | 116.9(12) |
| C(128)-C(125)-C(127) | 113.2(12) |
| C(126)-C(125)-S(32)  | 110.3(10) |
| C(128)-C(125)-S(32)  | 98.9(9)   |
| C(127)-C(125)-S(32)  | 106.7(8)  |
| C(125)-C(126)-H(12P) | 109.5     |
| C(125)-C(126)-H(12Q) | 109.5     |
| H(12P)-C(126)-H(12Q) | 109.5     |
| C(125)-C(126)-H(12R) | 109.5     |
| H(12P)-C(126)-H(12R) | 109.5     |
| H(12Q)-C(126)-H(12R) | 109.5     |
| C(125)-C(127)-H(12S) | 109.5     |
| C(125)-C(127)-H(12T) | 109.5     |
| H(12S)-C(127)-H(12T) | 109.5     |
| C(125)-C(127)-H(12U) | 109.5     |
| H(12S)-C(127)-H(12U) | 109.5     |
| H(12T)-C(127)-H(12U) | 109.5     |
| C(125)-C(128)-H(12V) | 109.5     |
| C(125)-C(128)-H(12W) | 109.5     |
| H(12V)-C(128)-H(12W) | 109.5     |



|                       |           |
|-----------------------|-----------|
| C(125)-C(128)-H(12\$) | 109.5     |
| H(12V)-C(128)-H(12\$) | 109.5     |
| H(12W)-C(128)-H(12\$) | 109.5     |
| C(134)-C(129)-C(130)  | 120.8(13) |
| C(134)-C(129)-B(1)    | 127.1(11) |
| C(130)-C(129)-B(1)    | 111.5(10) |
| C(129)-C(130)-C(131)  | 118.4(12) |
| C(129)-C(130)-H(130)  | 120.8     |
| C(131)-C(130)-H(130)  | 120.8     |
| C(132)-C(131)-C(130)  | 120.3(13) |
| C(132)-C(131)-H(131)  | 119.8     |
| C(130)-C(131)-H(131)  | 119.8     |
| C(131)-C(132)-C(133)  | 121.0(13) |
| C(131)-C(132)-H(132)  | 119.5     |
| C(133)-C(132)-H(132)  | 119.5     |
| C(132)-C(133)-C(134)  | 118.3(13) |
| C(132)-C(133)-H(133)  | 120.9     |
| C(134)-C(133)-H(133)  | 120.9     |
| C(129)-C(134)-C(133)  | 121.1(12) |
| C(129)-C(134)-H(134)  | 119.4     |
| C(133)-C(134)-H(134)  | 119.4     |
| C(136)-C(135)-C(140)  | 116.5(14) |
| C(136)-C(135)-B(1)    | 125.1(12) |
| C(140)-C(135)-B(1)    | 117.0(11) |
| C(135)-C(136)-C(137)  | 119.8(14) |
| C(135)-C(136)-H(136)  | 120.1     |
| C(137)-C(136)-H(136)  | 120.1     |
| C(138)-C(137)-C(136)  | 127.5(14) |
| C(138)-C(137)-H(137)  | 116.3     |
| C(136)-C(137)-H(137)  | 116.3     |

|                      |           |
|----------------------|-----------|
| C(137)-C(138)-C(139) | 112.2(14) |
| C(137)-C(138)-H(138) | 123.9     |
| C(139)-C(138)-H(138) | 123.9     |
| C(138)-C(139)-C(140) | 125.1(13) |
| C(138)-C(139)-H(139) | 117.4     |
| C(140)-C(139)-H(139) | 117.4     |
| C(139)-C(140)-C(135) | 117.7(13) |
| C(139)-C(140)-H(140) | 121.1     |
| C(135)-C(140)-H(140) | 121.1     |
| C(146)-C(141)-C(142) | 118.9(12) |
| C(146)-C(141)-B(1)   | 120.1(11) |
| C(142)-C(141)-B(1)   | 120.8(10) |
| C(143)-C(142)-C(141) | 120.9(13) |
| C(143)-C(142)-H(142) | 119.6     |
| C(141)-C(142)-H(142) | 119.6     |
| C(144)-C(143)-C(142) | 120.2(13) |
| C(144)-C(143)-H(143) | 119.9     |
| C(142)-C(143)-H(143) | 119.9     |
| C(143)-C(144)-C(145) | 120.5(12) |
| C(143)-C(144)-H(144) | 119.7     |
| C(145)-C(144)-H(144) | 119.7     |
| C(144)-C(145)-C(146) | 119.3(13) |
| C(144)-C(145)-H(145) | 120.4     |
| C(146)-C(145)-H(145) | 120.4     |
| C(141)-C(146)-C(145) | 120.2(13) |
| C(141)-C(146)-H(146) | 119.9     |
| C(145)-C(146)-H(146) | 119.9     |
| C(152)-C(147)-C(148) | 113.2(13) |
| C(152)-C(147)-B(1)   | 124.0(12) |
| C(148)-C(147)-B(1)   | 122.8(10) |

|                      |           |
|----------------------|-----------|
| C(149)-C(148)-C(147) | 119.9(13) |
| C(149)-C(148)-H(148) | 120.0     |
| C(147)-C(148)-H(148) | 120.0     |
| C(150)-C(149)-C(148) | 126.3(14) |
| C(150)-C(149)-H(149) | 116.9     |
| C(148)-C(149)-H(149) | 116.9     |
| C(149)-C(150)-C(151) | 115.7(13) |
| C(149)-C(150)-H(150) | 122.2     |
| C(151)-C(150)-H(150) | 122.2     |
| C(150)-C(151)-C(152) | 119.1(13) |
| C(150)-C(151)-H(151) | 120.4     |
| C(152)-C(151)-H(151) | 120.4     |
| C(147)-C(152)-C(151) | 125.6(14) |
| C(147)-C(152)-H(152) | 117.2     |
| C(151)-C(152)-H(152) | 117.2     |
| C(154)-C(153)-C(158) | 115.4(12) |
| C(154)-C(153)-B(2)   | 124.5(11) |
| C(158)-C(153)-B(2)   | 119.3(10) |
| C(153)-C(154)-C(155) | 120.7(13) |
| C(153)-C(154)-H(154) | 119.7     |
| C(155)-C(154)-H(154) | 119.7     |
| C(156)-C(155)-C(154) | 120.7(12) |
| C(156)-C(155)-H(155) | 119.6     |
| C(154)-C(155)-H(155) | 119.6     |
| C(157)-C(156)-C(155) | 120.1(13) |
| C(157)-C(156)-H(156) | 120.0     |
| C(155)-C(156)-H(156) | 120.0     |
| C(158)-C(157)-C(156) | 118.1(13) |
| C(158)-C(157)-H(157) | 121.0     |
| C(156)-C(157)-H(157) | 121.0     |

|                      |           |
|----------------------|-----------|
| C(157)-C(158)-C(153) | 124.7(13) |
| C(157)-C(158)-H(158) | 117.7     |
| C(153)-C(158)-H(158) | 117.7     |
| C(160)-C(159)-C(164) | 114.3(13) |
| C(160)-C(159)-B(2)   | 122.4(11) |
| C(164)-C(159)-B(2)   | 123.1(11) |
| C(161)-C(160)-C(159) | 118.5(13) |
| C(161)-C(160)-H(160) | 120.7     |
| C(159)-C(160)-H(160) | 120.7     |
| C(160)-C(161)-C(162) | 127.8(13) |
| C(160)-C(161)-H(161) | 116.1     |
| C(162)-C(161)-H(161) | 116.1     |
| C(163)-C(162)-C(161) | 110.9(13) |
| C(163)-C(162)-H(162) | 124.6     |
| C(161)-C(162)-H(162) | 124.6     |
| C(164)-C(163)-C(162) | 124.1(13) |
| C(164)-C(163)-H(163) | 118.0     |
| C(162)-C(163)-H(163) | 118.0     |
| C(163)-C(164)-C(159) | 124.3(13) |
| C(163)-C(164)-H(164) | 117.9     |
| C(159)-C(164)-H(164) | 117.9     |
| C(166)-C(165)-C(170) | 115.5(13) |
| C(166)-C(165)-B(2)   | 116.9(11) |
| C(170)-C(165)-B(2)   | 127.5(12) |
| C(165)-C(166)-C(167) | 124.2(14) |
| C(165)-C(166)-H(166) | 117.9     |
| C(167)-C(166)-H(166) | 117.9     |
| C(168)-C(167)-C(166) | 117.4(13) |
| C(168)-C(167)-H(167) | 121.3     |
| C(166)-C(167)-H(167) | 121.3     |

|                      |           |
|----------------------|-----------|
| C(167)-C(168)-C(169) | 120.6(13) |
| C(167)-C(168)-H(168) | 119.7     |
| C(169)-C(168)-H(168) | 119.7     |
| C(170)-C(169)-C(168) | 115.0(13) |
| C(170)-C(169)-H(169) | 122.5     |
| C(168)-C(169)-H(169) | 122.5     |
| C(169)-C(170)-C(165) | 127.2(14) |
| C(169)-C(170)-H(170) | 116.4     |
| C(165)-C(170)-H(170) | 116.4     |
| C(176)-C(171)-C(172) | 115.7(13) |
| C(176)-C(171)-B(2)   | 121.6(11) |
| C(172)-C(171)-B(2)   | 122.5(10) |
| C(171)-C(172)-C(173) | 125.8(12) |
| C(171)-C(172)-H(172) | 117.1     |
| C(173)-C(172)-H(172) | 117.1     |
| C(172)-C(173)-C(174) | 117.4(13) |
| C(172)-C(173)-H(173) | 121.3     |
| C(174)-C(173)-H(173) | 121.3     |
| C(173)-C(174)-C(175) | 116.5(13) |
| C(173)-C(174)-H(174) | 121.7     |
| C(175)-C(174)-H(174) | 121.7     |
| C(176)-C(175)-C(174) | 122.2(13) |
| C(176)-C(175)-H(175) | 118.9     |
| C(174)-C(175)-H(175) | 118.9     |
| C(175)-C(176)-C(171) | 122.0(13) |
| C(175)-C(176)-H(176) | 119.0     |
| C(171)-C(176)-H(176) | 119.0     |
| C(1)-S(1)-Ag(40)     | 117.8(5)  |
| C(1)-S(1)-Ag(8)      | 110.8(5)  |
| Ag(40)-S(1)-Ag(8)    | 73.13(8)  |

|                    |            |
|--------------------|------------|
| C(1)-S(1)-Ag(25)   | 112.5(5)   |
| Ag(40)-S(1)-Ag(25) | 126.74(12) |
| Ag(8)-S(1)-Ag(25)  | 73.76(8)   |
| C(5)-S(2)-Au(22)   | 109.0(4)   |
| C(5)-S(2)-Ag(19)   | 128.9(4)   |
| Au(22)-S(2)-Ag(19) | 86.19(10)  |
| C(9)-S(3)-Au(21)   | 110.5(4)   |
| C(9)-S(3)-Ag(16)   | 126.6(4)   |
| Au(21)-S(3)-Ag(16) | 87.53(10)  |
| C(9)-S(3)-Ag(37)   | 123.8(4)   |
| Au(21)-S(3)-Ag(37) | 117.62(11) |
| Ag(16)-S(3)-Ag(37) | 83.71(9)   |
| C(13)-S(4)-Ag(26)  | 119.7(5)   |
| C(13)-S(4)-Ag(12)  | 114.2(5)   |
| Ag(26)-S(4)-Ag(12) | 72.65(9)   |
| C(13)-S(4)-Ag(22)  | 109.6(5)   |
| Ag(26)-S(4)-Ag(22) | 128.20(12) |
| Ag(12)-S(4)-Ag(22) | 73.64(9)   |
| C(17)-S(5)-Au(22)  | 110.5(4)   |
| C(17)-S(5)-Ag(30)  | 114.2(4)   |
| Au(22)-S(5)-Ag(30) | 85.23(10)  |
| C(17)-S(5)-Ag(38)  | 137.8(4)   |
| Au(22)-S(5)-Ag(38) | 111.25(11) |
| Ag(30)-S(5)-Ag(38) | 75.32(8)   |
| C(21)-S(6)-Au(24)  | 112.9(4)   |
| C(21)-S(6)-Ag(27)  | 134.7(4)   |
| Au(24)-S(6)-Ag(27) | 100.73(11) |
| C(21)-S(6)-Ag(21)  | 123.8(4)   |
| Au(24)-S(6)-Ag(21) | 85.21(10)  |
| Ag(27)-S(6)-Ag(21) | 87.23(10)  |

|                     |            |
|---------------------|------------|
| C(25)-S(7)-Au(21)   | 111.5(5)   |
| C(25)-S(7)-Ag(32)   | 121.3(5)   |
| Au(21)-S(7)-Ag(32)  | 86.97(10)  |
| C(25)-S(7)-Ag(41)   | 135.4(5)   |
| Au(21)-S(7)-Ag(41)  | 101.74(11) |
| Ag(32)-S(7)-Ag(41)  | 88.41(9)   |
| C(29)-S(8)-Ag(41)   | 123.3(5)   |
| C(29)-S(8)-Ag(23)   | 123.7(4)   |
| Ag(41)-S(8)-Ag(23)  | 84.45(9)   |
| C(29)-S(8)-Ag(24)   | 127.0(4)   |
| Ag(41)-S(8)-Ag(24)  | 89.80(10)  |
| Ag(23)-S(8)-Ag(24)  | 97.05(10)  |
| C(33)-S(9)-Ag(34)   | 114.1(4)   |
| C(33)-S(9)-Ag(6)    | 114.9(4)   |
| Ag(34)-S(9)-Ag(6)   | 74.33(9)   |
| C(33)-S(9)-Ag(28)   | 115.3(4)   |
| Ag(34)-S(9)-Ag(28)  | 128.87(13) |
| Ag(6)-S(9)-Ag(28)   | 73.98(8)   |
| C(37)-S(10)-Ag(37)  | 116.8(4)   |
| C(37)-S(10)-Ag(7)   | 114.7(4)   |
| Ag(37)-S(10)-Ag(7)  | 72.20(8)   |
| C(37)-S(10)-Ag(18)  | 111.9(4)   |
| Ag(37)-S(10)-Ag(18) | 127.90(12) |
| Ag(7)-S(10)-Ag(18)  | 71.71(8)   |
| C(41)-S(11)-Ag(31)  | 111.2(4)   |
| C(41)-S(11)-Ag(11)  | 114.3(4)   |
| Ag(31)-S(11)-Ag(11) | 72.99(9)   |
| C(41)-S(11)-Ag(18)  | 109.3(4)   |
| Ag(31)-S(11)-Ag(18) | 133.36(13) |
| Ag(11)-S(11)-Ag(18) | 69.95(8)   |

|                     |            |
|---------------------|------------|
| C(45)-S(12)-Ag(36)  | 112.0(5)   |
| C(45)-S(12)-Ag(4)   | 115.1(5)   |
| Ag(36)-S(12)-Ag(4)  | 70.47(8)   |
| C(45)-S(12)-Ag(24)  | 110.2(4)   |
| Ag(36)-S(12)-Ag(24) | 131.25(12) |
| Ag(4)-S(12)-Ag(24)  | 70.31(8)   |
| C(49)-S(13)-Au(23)  | 107.2(4)   |
| C(49)-S(13)-Ag(23)  | 125.8(4)   |
| Au(23)-S(13)-Ag(23) | 83.80(10)  |
| C(49)-S(13)-Ag(33)  | 139.3(4)   |
| Au(23)-S(13)-Ag(33) | 102.00(11) |
| Ag(23)-S(13)-Ag(33) | 84.52(10)  |
| C(53)-S(14)-Au(24)  | 108.4(4)   |
| C(53)-S(14)-Ag(17)  | 127.3(4)   |
| Au(24)-S(14)-Ag(17) | 87.82(9)   |
| C(53)-S(14)-Ag(34)  | 126.4(4)   |
| Au(24)-S(14)-Ag(34) | 117.27(12) |
| Ag(17)-S(14)-Ag(34) | 82.32(9)   |
| C(57)-S(15)-Ag(36)  | 114.1(4)   |
| C(57)-S(15)-Ag(13)  | 113.2(4)   |
| Ag(36)-S(15)-Ag(13) | 72.63(9)   |
| C(57)-S(15)-Ag(35)  | 112.8(4)   |
| Ag(36)-S(15)-Ag(35) | 128.80(13) |
| Ag(13)-S(15)-Ag(35) | 71.20(8)   |
| C(61)-S(16)-Ag(34)  | 111.3(4)   |
| C(61)-S(16)-Ag(2)   | 114.1(4)   |
| Ag(34)-S(16)-Ag(2)  | 70.85(8)   |
| C(61)-S(16)-Ag(22)  | 109.8(4)   |
| Ag(34)-S(16)-Ag(22) | 130.56(12) |
| Ag(2)-S(16)-Ag(22)  | 68.06(8)   |



|                     |            |
|---------------------|------------|
| C(65)-S(17)-Au(19)  | 106.8(4)   |
| C(65)-S(17)-Ag(15)  | 128.2(4)   |
| Au(19)-S(17)-Ag(15) | 86.87(10)  |
| C(65)-S(17)-Ag(40)  | 130.3(4)   |
| Au(19)-S(17)-Ag(40) | 115.75(11) |
| Ag(15)-S(17)-Ag(40) | 79.92(9)   |
| C(69)-S(18)-Ag(37)  | 109.8(5)   |
| C(69)-S(18)-Ag(10)  | 117.7(5)   |
| Ag(37)-S(18)-Ag(10) | 71.48(8)   |
| C(69)-S(18)-Ag(28)  | 111.0(4)   |
| Ag(37)-S(18)-Ag(28) | 132.07(13) |
| Ag(10)-S(18)-Ag(28) | 68.00(8)   |
| C(73)-S(19)-Au(19)  | 109.5(4)   |
| C(73)-S(19)-Ag(39)  | 123.0(5)   |
| Au(19)-S(19)-Ag(39) | 91.50(10)  |
| C(73)-S(19)-Ag(45)  | 139.1(4)   |
| Au(19)-S(19)-Ag(45) | 102.09(11) |
| Ag(39)-S(19)-Ag(45) | 80.21(9)   |
| C(77)-S(20)-Ag(45)  | 125.3(4)   |
| C(77)-S(20)-Ag(21)  | 122.3(4)   |
| Ag(45)-S(20)-Ag(21) | 83.85(9)   |
| C(77)-S(20)-Ag(22)  | 128.7(4)   |
| Ag(45)-S(20)-Ag(22) | 93.77(10)  |
| Ag(21)-S(20)-Ag(22) | 90.14(10)  |
| C(81)-S(21)-Ag(40)  | 110.2(4)   |
| C(81)-S(21)-Ag(9)   | 115.8(4)   |
| Ag(40)-S(21)-Ag(9)  | 73.09(8)   |
| C(81)-S(21)-Ag(35)  | 113.6(5)   |
| Ag(40)-S(21)-Ag(35) | 132.41(13) |
| Ag(9)-S(21)-Ag(35)  | 71.91(9)   |

|                     |            |
|---------------------|------------|
| C(85)-S(22)-Ag(27)  | 117.1(5)   |
| C(85)-S(22)-Ag(44)  | 126.0(5)   |
| Ag(27)-S(22)-Ag(44) | 79.84(9)   |
| C(85)-S(22)-Ag(18)  | 127.5(5)   |
| Ag(27)-S(22)-Ag(18) | 86.24(10)  |
| Ag(44)-S(22)-Ag(18) | 103.00(11) |
| C(89)-S(23)-Ag(31)  | 116.0(4)   |
| C(89)-S(23)-Ag(14)  | 116.1(4)   |
| Ag(31)-S(23)-Ag(14) | 71.53(8)   |
| C(89)-S(23)-Ag(24)  | 113.9(4)   |
| Ag(31)-S(23)-Ag(24) | 126.84(12) |
| Ag(14)-S(23)-Ag(24) | 71.20(8)   |
| C(93)-S(24)-Ag(26)  | 110.4(4)   |
| C(93)-S(24)-Ag(5)   | 115.8(4)   |
| Ag(26)-S(24)-Ag(5)  | 71.96(8)   |
| C(93)-S(24)-Ag(25)  | 110.2(5)   |
| Ag(26)-S(24)-Ag(25) | 133.21(12) |
| Ag(5)-S(24)-Ag(25)  | 70.16(8)   |
| C(97)-S(25)-Au(20)  | 110.1(4)   |
| C(97)-S(25)-Ag(42)  | 134.8(5)   |
| Au(20)-S(25)-Ag(42) | 105.90(11) |
| C(97)-S(25)-Ag(44)  | 122.8(4)   |
| Au(20)-S(25)-Ag(44) | 96.98(11)  |
| Ag(42)-S(25)-Ag(44) | 77.65(9)   |
| C(101)-S(26)-Ag(32) | 119.1(4)   |
| C(101)-S(26)-Ag(28) | 126.9(5)   |
| Ag(32)-S(26)-Ag(28) | 89.94(10)  |
| C(101)-S(26)-Ag(38) | 123.8(5)   |
| Ag(32)-S(26)-Ag(38) | 77.46(9)   |
| Ag(28)-S(26)-Ag(38) | 104.32(11) |

|                     |            |
|---------------------|------------|
| C(105)-S(27)-Ag(30) | 121.2(5)   |
| C(105)-S(27)-Ag(25) | 128.4(4)   |
| Ag(30)-S(27)-Ag(25) | 97.19(11)  |
| C(105)-S(27)-Ag(33) | 120.5(5)   |
| Ag(30)-S(27)-Ag(33) | 82.07(9)   |
| Ag(25)-S(27)-Ag(33) | 96.04(11)  |
| C(109)-S(28)-Ag(39) | 123.5(4)   |
| C(109)-S(28)-Ag(35) | 128.7(4)   |
| Ag(39)-S(28)-Ag(35) | 103.31(11) |
| C(109)-S(28)-Ag(42) | 115.4(5)   |
| Ag(39)-S(28)-Ag(42) | 76.65(9)   |
| Ag(35)-S(28)-Ag(42) | 93.15(10)  |
| C(113)-S(29)-Au(23) | 110.7(4)   |
| C(113)-S(29)-Ag(29) | 127.3(5)   |
| Au(23)-S(29)-Ag(29) | 88.53(10)  |
| C(117)-S(30)-Au(20) | 110.2(4)   |
| C(117)-S(30)-Ag(20) | 127.6(4)   |
| Au(20)-S(30)-Ag(20) | 89.78(11)  |
| C(117)-S(30)-Ag(31) | 124.7(4)   |
| Au(20)-S(30)-Ag(31) | 116.63(12) |
| Ag(20)-S(30)-Ag(31) | 81.16(8)   |
| C(121)-S(31)-Ag(46) | 122.8(4)   |
| C(121)-S(31)-Ag(38) | 112.1(5)   |
| Ag(46)-S(31)-Ag(38) | 76.08(9)   |
| C(121)-S(31)-Ag(33) | 122.0(5)   |
| Ag(46)-S(31)-Ag(33) | 75.29(9)   |
| Ag(38)-S(31)-Ag(33) | 125.89(11) |
| C(121)-S(31)-Ag(30) | 141.3(4)   |
| Ag(46)-S(31)-Ag(30) | 95.70(10)  |
| Ag(38)-S(31)-Ag(30) | 70.45(8)   |

|                     |           |
|---------------------|-----------|
| Ag(33)-S(31)-Ag(30) | 67.94(7)  |
| C(125)-S(32)-Ag(43) | 121.0(4)  |
| C(125)-S(32)-Ag(42) | 141.1(4)  |
| Ag(43)-S(32)-Ag(42) | 92.08(10) |
| C(125)-S(32)-Ag(39) | 130.6(4)  |
| Ag(43)-S(32)-Ag(39) | 83.71(9)  |
| Ag(42)-S(32)-Ag(39) | 67.77(8)  |

---

Symmetry transformations used to generate equivalent atoms:

**Table S4.** Anisotropic displacement parameters ( $\text{\AA}^2 \times 10^3$ ) for  $[\text{Ag}_{46}\text{Au}_{24}(\text{S}^t\text{Bu})_{32}](\text{BPh}_4)_2$ . The anisotropic displacement factor exponent takes the form:  $-2p^2[ h^2 a^* U^{11} + \dots + 2 h k a^* b^* U^{12} ]$

---

|        | $U^{11}$ | $U^{22}$ | $U^{33}$ | $U^{23}$ | $U^{13}$ | $U^{12}$ |
|--------|----------|----------|----------|----------|----------|----------|
| Ag(1)  | 25(1)    | 25(1)    | 25(1)    | -2(1)    | 7(1)     | 6(1)     |
| Ag(2)  | 30(1)    | 26(1)    | 26(1)    | -4(1)    | 7(1)     | -1(1)    |
| Ag(3)  | 25(1)    | 24(1)    | 25(1)    | -3(1)    | 7(1)     | 6(1)     |
| Ag(4)  | 30(1)    | 27(1)    | 29(1)    | -5(1)    | 6(1)     | 0(1)     |
| Ag(5)  | 28(1)    | 28(1)    | 26(1)    | 6(1)     | 7(1)     | -4(1)    |
| Ag(6)  | 26(1)    | 31(1)    | 28(1)    | -2(1)    | -2(1)    | -2(1)    |
| Ag(7)  | 31(1)    | 26(1)    | 26(1)    | 4(1)     | 6(1)     | -2(1)    |
| Ag(8)  | 30(1)    | 26(1)    | 29(1)    | 5(1)     | 6(1)     | -4(1)    |
| Ag(9)  | 26(1)    | 28(1)    | 29(1)    | -4(1)    | 7(1)     | -3(1)    |
| Ag(10) | 25(1)    | 27(1)    | 27(1)    | 4(1)     | 7(1)     | -2(1)    |
| Ag(11) | 31(1)    | 29(1)    | 26(1)    | 3(1)     | 5(1)     | -5(1)    |
| Ag(12) | 28(1)    | 30(1)    | 28(1)    | -6(1)    | 9(1)     | -3(1)    |
| Ag(13) | 29(1)    | 30(1)    | 30(1)    | -5(1)    | -4(1)    | -1(1)    |
| Ag(14) | 28(1)    | 30(1)    | 27(1)    | -7(1)    | 9(1)     | -2(1)    |

|        |       |       |       |        |       |        |
|--------|-------|-------|-------|--------|-------|--------|
| Ag(15) | 27(1) | 29(1) | 27(1) | 3(1)   | 7(1)  | -2(1)  |
| Ag(16) | 30(1) | 29(1) | 25(1) | 2(1)   | 7(1)  | -3(1)  |
| Ag(17) | 27(1) | 27(1) | 26(1) | -3(1)  | 5(1)  | -3(1)  |
| Ag(18) | 34(1) | 28(1) | 27(1) | 3(1)   | 5(1)  | -5(1)  |
| Ag(19) | 28(1) | 27(1) | 26(1) | -2(1)  | 6(1)  | -1(1)  |
| Ag(20) | 30(1) | 28(1) | 27(1) | -5(1)  | 0(1)  | 5(1)   |
| Ag(21) | 29(1) | 26(1) | 33(1) | -5(1)  | 9(1)  | 8(1)   |
| Ag(22) | 30(1) | 29(1) | 29(1) | -8(1)  | 9(1)  | 5(1)   |
| Ag(23) | 31(1) | 26(1) | 33(1) | 2(1)   | 9(1)  | 9(1)   |
| Ag(24) | 32(1) | 27(1) | 30(1) | -8(1)  | 8(1)  | 6(1)   |
| Ag(25) | 32(1) | 27(1) | 30(1) | 8(1)   | 6(1)  | -5(1)  |
| Ag(26) | 29(1) | 31(1) | 28(1) | -5(1)  | 8(1)  | -7(1)  |
| Ag(27) | 33(1) | 26(1) | 30(1) | -2(1)  | -2(1) | 8(1)   |
| Ag(28) | 27(1) | 32(1) | 30(1) | -4(1)  | -2(1) | -3(1)  |
| Ag(29) | 29(1) | 26(1) | 30(1) | -4(1)  | 0(1)  | -1(1)  |
| Ag(30) | 30(1) | 29(1) | 30(1) | 8(1)   | -2(1) | 6(1)   |
| Ag(31) | 32(1) | 31(1) | 28(1) | -6(1)  | 7(1)  | -7(1)  |
| Ag(32) | 27(1) | 28(1) | 29(1) | 4(1)   | 7(1)  | 7(1)   |
| Ag(33) | 32(1) | 28(1) | 31(1) | -1(1)  | -3(1) | 7(1)   |
| Ag(34) | 30(1) | 30(1) | 30(1) | -10(1) | 10(1) | -10(1) |
| Ag(35) | 28(1) | 31(1) | 33(1) | -6(1)  | -4(1) | -1(1)  |
| Ag(36) | 32(1) | 31(1) | 33(1) | -6(1)  | -5(1) | 7(1)   |
| Ag(37) | 30(1) | 29(1) | 30(1) | 6(1)   | 9(1)  | -6(1)  |
| Ag(38) | 27(1) | 30(1) | 32(1) | 8(1)   | 5(1)  | 8(1)   |
| Ag(39) | 29(1) | 31(1) | 30(1) | -6(1)  | -3(1) | 10(1)  |
| Ag(40) | 29(1) | 31(1) | 34(1) | 5(1)   | 7(1)  | -6(1)  |
| Ag(41) | 28(1) | 27(1) | 35(1) | -6(1)  | 10(1) | 8(1)   |
| Ag(42) | 29(1) | 33(1) | 32(1) | 6(1)   | -3(1) | 11(1)  |
| Ag(43) | 28(1) | 27(1) | 31(1) | 3(1)   | -1(1) | 9(1)   |
| Ag(44) | 32(1) | 26(1) | 34(1) | 5(1)   | -7(1) | 8(1)   |

|        |       |       |       |       |       |        |
|--------|-------|-------|-------|-------|-------|--------|
| Ag(45) | 27(1) | 28(1) | 36(1) | -8(1) | 7(1)  | 7(1)   |
| Ag(46) | 27(1) | 27(1) | 31(1) | 3(1)  | 6(1)  | 8(1)   |
| Au(1)  | 29(1) | 25(1) | 25(1) | 6(1)  | -4(1) | 6(1)   |
| Au(2)  | 25(1) | 27(1) | 26(1) | 5(1)  | 7(1)  | 6(1)   |
| Au(3)  | 27(1) | 26(1) | 28(1) | -4(1) | 7(1)  | 7(1)   |
| Au(4)  | 26(1) | 25(1) | 27(1) | -6(1) | 8(1)  | 7(1)   |
| Au(5)  | 26(1) | 25(1) | 28(1) | -6(1) | 8(1)  | 7(1)   |
| Au(6)  | 27(1) | 25(1) | 27(1) | 6(1)  | 6(1)  | -3(1)  |
| Au(7)  | 26(1) | 25(1) | 26(1) | 4(1)  | 7(1)  | 6(1)   |
| Au(8)  | 25(1) | 26(1) | 27(1) | 6(1)  | 6(1)  | 5(1)   |
| Au(9)  | 27(1) | 24(1) | 26(1) | -5(1) | 7(1)  | 7(1)   |
| Au(10) | 25(1) | 25(1) | 27(1) | -6(1) | 9(1)  | 7(1)   |
| Au(11) | 25(1) | 26(1) | 28(1) | -6(1) | 7(1)  | 7(1)   |
| Au(12) | 27(1) | 26(1) | 26(1) | 6(1)  | 5(1)  | 6(1)   |
| Au(13) | 27(1) | 25(1) | 27(1) | 4(1)  | 7(1)  | 6(1)   |
| Au(14) | 26(1) | 27(1) | 26(1) | 4(1)  | 6(1)  | 7(1)   |
| Au(15) | 25(1) | 27(1) | 26(1) | 4(1)  | 7(1)  | 6(1)   |
| Au(16) | 27(1) | 26(1) | 27(1) | 3(1)  | 7(1)  | 7(1)   |
| Au(17) | 26(1) | 26(1) | 26(1) | -5(1) | 7(1)  | 6(1)   |
| Au(18) | 26(1) | 24(1) | 25(1) | -4(1) | 6(1)  | 7(1)   |
| Au(19) | 28(1) | 30(1) | 29(1) | 6(1)  | 9(1)  | 7(1)   |
| Au(20) | 30(1) | 30(1) | 28(1) | -6(1) | -6(1) | 7(1)   |
| Au(21) | 29(1) | 30(1) | 28(1) | 5(1)  | 10(1) | -5(1)  |
| Au(22) | 30(1) | 31(1) | 28(1) | 7(1)  | -6(1) | 7(1)   |
| Au(23) | 30(1) | 28(1) | 32(1) | -5(1) | -6(1) | 6(1)   |
| Au(24) | 30(1) | 28(1) | 32(1) | -5(1) | -6(1) | 6(1)   |
| B(1)   | 34(8) | 45(9) | 41(9) | 9(7)  | 8(7)  | -5(7)  |
| B(2)   | 43(9) | 40(9) | 36(8) | -4(7) | 11(7) | -8(7)  |
| C(1)   | 42(8) | 33(7) | 43(8) | 12(6) | 3(6)  | -13(6) |
| C(2)   | 47(8) | 31(7) | 25(6) | 4(5)  | 2(5)  | -12(6) |

|       |        |        |       |        |        |        |
|-------|--------|--------|-------|--------|--------|--------|
| C(3)  | 39(7)  | 33(7)  | 43(8) | 14(6)  | -14(6) | -13(6) |
| C(4)  | 45(8)  | 33(7)  | 53(9) | -6(6)  | -5(7)  | -11(6) |
| C(5)  | 36(7)  | 30(6)  | 29(6) | 9(5)   | 1(5)   | -2(5)  |
| C(6)  | 30(6)  | 27(6)  | 39(7) | 2(5)   | 6(5)   | -9(5)  |
| C(7)  | 74(11) | 29(7)  | 38(8) | 11(6)  | -10(7) | -2(7)  |
| C(8)  | 29(7)  | 34(7)  | 48(8) | -3(6)  | 0(6)   | -1(5)  |
| C(9)  | 38(7)  | 29(6)  | 34(7) | 1(5)   | 12(5)  | -10(5) |
| C(10) | 39(7)  | 26(6)  | 22(6) | 0(5)   | 0(5)   | -17(5) |
| C(11) | 37(7)  | 23(6)  | 36(7) | 4(5)   | 19(5)  | -12(5) |
| C(12) | 30(7)  | 45(8)  | 40(7) | -12(6) | 17(6)  | 5(6)   |
| C(13) | 37(7)  | 44(8)  | 32(7) | -5(6)  | 14(6)  | 5(6)   |
| C(14) | 34(7)  | 53(9)  | 47(8) | -20(7) | 11(6)  | 11(6)  |
| C(15) | 30(7)  | 45(8)  | 40(7) | -12(6) | 17(6)  | 5(6)   |
| C(16) | 50(9)  | 51(9)  | 54(9) | 10(7)  | 30(7)  | 17(7)  |
| C(17) | 32(6)  | 28(6)  | 37(7) | 13(5)  | -3(5)  | 0(5)   |
| C(18) | 28(6)  | 29(6)  | 40(7) | 14(5)  | -10(5) | 5(5)   |
| C(19) | 44(8)  | 33(7)  | 35(7) | 8(6)   | -2(6)  | -9(6)  |
| C(20) | 45(8)  | 41(8)  | 30(7) | 4(6)   | -15(6) | 15(6)  |
| C(21) | 36(7)  | 32(7)  | 28(6) | -6(5)  | 13(5)  | 1(5)   |
| C(22) | 43(8)  | 38(8)  | 52(9) | -14(7) | 23(7)  | -9(6)  |
| C(23) | 40(7)  | 21(6)  | 33(6) | -7(5)  | 10(5)  | 2(5)   |
| C(24) | 40(8)  | 65(10) | 34(7) | -16(7) | 2(6)   | -19(7) |
| C(25) | 30(7)  | 46(8)  | 45(8) | -7(6)  | 15(6)  | 7(6)   |
| C(26) | 30(7)  | 45(8)  | 40(7) | -12(6) | 17(6)  | 5(6)   |
| C(27) | 30(7)  | 55(9)  | 46(8) | -11(7) | 18(6)  | 8(6)   |
| C(28) | 18(6)  | 44(8)  | 52(8) | -10(6) | 9(5)   | 7(5)   |
| C(29) | 54(8)  | 27(6)  | 33(7) | -6(5)  | 11(6)  | 15(6)  |
| C(30) | 60(10) | 36(8)  | 50(9) | -18(7) | 1(7)   | 19(7)  |
| C(31) | 37(7)  | 52(9)  | 46(8) | 8(7)   | 15(6)  | 32(7)  |
| C(32) | 42(8)  | 38(8)  | 50(8) | 7(6)   | 3(6)   | 12(6)  |

|       |        |       |       |        |        |        |
|-------|--------|-------|-------|--------|--------|--------|
| C(33) | 32(7)  | 38(7) | 31(6) | -4(5)  | -4(5)  | -9(5)  |
| C(34) | 40(8)  | 39(8) | 44(8) | 3(6)   | -12(6) | -10(6) |
| C(35) | 30(7)  | 53(9) | 34(7) | -10(6) | -4(5)  | -9(6)  |
| C(36) | 23(6)  | 44(8) | 44(8) | -14(6) | -14(5) | -4(5)  |
| C(37) | 34(7)  | 32(7) | 38(7) | 11(6)  | 2(5)   | -9(5)  |
| C(38) | 29(6)  | 43(8) | 42(7) | 20(6)  | 1(5)   | -20(6) |
| C(39) | 35(7)  | 26(6) | 49(8) | 6(6)   | -6(6)  | -4(5)  |
| C(40) | 34(7)  | 32(7) | 38(7) | 11(6)  | 2(5)   | -9(5)  |
| C(41) | 34(7)  | 33(7) | 30(6) | -2(5)  | 14(5)  | -11(5) |
| C(42) | 34(7)  | 46(8) | 40(7) | -3(6)  | 0(6)   | -15(6) |
| C(43) | 59(10) | 52(9) | 32(7) | -11(7) | 1(7)   | 14(8)  |
| C(44) | 42(8)  | 37(7) | 50(8) | 6(6)   | 21(7)  | -14(6) |
| C(45) | 38(7)  | 35(7) | 42(7) | -16(6) | -8(6)  | 8(6)   |
| C(46) | 30(7)  | 45(8) | 40(7) | -12(6) | 17(6)  | 5(6)   |
| C(47) | 57(9)  | 38(8) | 39(8) | -14(6) | 3(7)   | 4(7)   |
| C(48) | 47(9)  | 52(9) | 47(9) | -10(7) | -13(7) | -17(7) |
| C(49) | 21(5)  | 31(6) | 25(6) | -1(5)  | 7(4)   | 3(5)   |
| C(50) | 37(7)  | 43(8) | 33(7) | -16(6) | 0(6)   | 24(6)  |
| C(51) | 45(8)  | 44(8) | 46(8) | -6(7)  | 23(7)  | -14(7) |
| C(52) | 43(8)  | 53(9) | 28(7) | -4(6)  | -2(6)  | -11(7) |
| C(53) | 34(7)  | 32(7) | 32(6) | -3(5)  | 3(5)   | -9(5)  |
| C(54) | 29(7)  | 47(8) | 44(8) | -5(6)  | 3(6)   | -7(6)  |
| C(55) | 35(7)  | 31(7) | 41(7) | -5(6)  | 15(6)  | -15(5) |
| C(56) | 42(8)  | 53(9) | 35(7) | 1(6)   | 12(6)  | -5(7)  |
| C(57) | 24(6)  | 34(7) | 30(6) | -4(5)  | 1(5)   | -2(5)  |
| C(58) | 39(7)  | 42(8) | 29(6) | 4(6)   | -2(5)  | -15(6) |
| C(59) | 46(8)  | 49(8) | 23(6) | -7(6)  | 11(5)  | -10(6) |
| C(60) | 27(6)  | 36(7) | 30(6) | 1(5)   | 3(5)   | -5(5)  |
| C(61) | 45(8)  | 30(7) | 31(7) | -8(5)  | 7(6)   | -4(6)  |
| C(62) | 35(7)  | 36(7) | 48(8) | 7(6)   | 0(6)   | -20(6) |



|       |       |       |       |        |        |        |
|-------|-------|-------|-------|--------|--------|--------|
| C(63) | 45(8) | 40(8) | 33(7) | -10(6) | 4(6)   | 9(6)   |
| C(64) | 45(7) | 20(6) | 30(6) | -3(5)  | 6(5)   | -9(5)  |
| C(65) | 36(7) | 29(6) | 39(7) | 6(5)   | 16(6)  | -6(5)  |
| C(66) | 41(8) | 37(7) | 40(7) | -8(6)  | -4(6)  | 24(6)  |
| C(67) | 45(8) | 35(7) | 36(7) | 14(6)  | 2(6)   | -7(6)  |
| C(68) | 36(7) | 32(7) | 46(8) | -2(6)  | 17(6)  | -3(6)  |
| C(69) | 32(7) | 34(7) | 48(8) | 5(6)   | 1(6)   | -9(6)  |
| C(70) | 41(8) | 34(7) | 40(7) | 17(6)  | 7(6)   | 9(6)   |
| C(71) | 31(7) | 45(8) | 57(9) | 8(7)   | -9(6)  | 10(6)  |
| C(72) | 44(8) | 27(6) | 35(7) | -4(5)  | 3(6)   | -10(6) |
| C(73) | 31(7) | 34(7) | 44(8) | 9(6)   | 14(6)  | 9(5)   |
| C(74) | 38(8) | 42(8) | 49(8) | 2(6)   | 22(6)  | 0(6)   |
| C(75) | 37(7) | 33(7) | 48(8) | 4(6)   | -3(6)  | 13(6)  |
| C(76) | 42(8) | 27(6) | 45(8) | 2(6)   | 20(6)  | 19(6)  |
| C(77) | 43(7) | 27(6) | 26(6) | -4(5)  | 12(5)  | 9(5)   |
| C(78) | 31(7) | 52(9) | 39(7) | 13(6)  | 12(6)  | 22(6)  |
| C(79) | 60(9) | 39(8) | 33(7) | -15(6) | 9(6)   | 7(7)   |
| C(80) | 38(7) | 41(7) | 34(7) | 6(6)   | 13(6)  | 21(6)  |
| C(81) | 32(7) | 42(8) | 40(7) | -4(6)  | -4(6)  | -11(6) |
| C(82) | 43(8) | 47(8) | 36(7) | 1(6)   | 8(6)   | -2(6)  |
| C(83) | 43(8) | 45(8) | 43(8) | 0(7)   | 3(6)   | -11(7) |
| C(84) | 36(8) | 43(8) | 58(9) | 0(7)   | -19(7) | -11(6) |
| C(85) | 50(8) | 28(7) | 43(8) | 8(6)   | -12(6) | 0(6)   |
| C(86) | 51(9) | 47(8) | 38(8) | 15(6)  | -20(7) | 12(7)  |
| C(87) | 44(8) | 31(7) | 59(9) | -5(6)  | 25(7)  | -17(6) |
| C(88) | 53(8) | 25(6) | 35(7) | 10(5)  | -21(6) | -4(6)  |
| C(89) | 40(7) | 40(7) | 30(6) | -11(6) | 11(5)  | -1(6)  |
| C(90) | 33(6) | 28(6) | 24(6) | -7(5)  | 17(5)  | -8(5)  |
| C(91) | 39(7) | 47(8) | 31(7) | -16(6) | 13(6)  | -9(6)  |
| C(92) | 41(7) | 40(7) | 26(6) | -10(5) | 15(5)  | 12(6)  |

|        |        |        |        |        |        |        |
|--------|--------|--------|--------|--------|--------|--------|
| C(93)  | 41(7)  | 44(8)  | 28(6)  | 9(6)   | 8(5)   | -11(6) |
| C(94)  | 43(7)  | 25(6)  | 32(6)  | -11(5) | -3(5)  | -6(5)  |
| C(95)  | 41(8)  | 45(8)  | 41(8)  | 21(6)  | 9(6)   | -9(6)  |
| C(96)  | 31(7)  | 64(10) | 32(7)  | -4(7)  | 11(5)  | -18(7) |
| C(97)  | 41(7)  | 31(7)  | 33(7)  | 7(5)   | -11(6) | 10(6)  |
| C(98)  | 31(6)  | 44(7)  | 22(6)  | 4(5)   | -17(5) | 8(6)   |
| C(99)  | 46(8)  | 50(9)  | 32(7)  | 4(6)   | -14(6) | -2(7)  |
| C(100) | 31(7)  | 38(7)  | 51(8)  | 8(6)   | -3(6)  | 14(6)  |
| C(101) | 26(6)  | 53(9)  | 36(7)  | -5(6)  | 4(5)   | 12(6)  |
| C(102) | 29(7)  | 39(8)  | 56(9)  | 12(7)  | -6(6)  | 14(6)  |
| C(103) | 38(7)  | 37(7)  | 36(7)  | 18(6)  | 8(6)   | 13(6)  |
| C(104) | 33(7)  | 59(9)  | 41(8)  | 9(7)   | 0(6)   | 31(7)  |
| C(105) | 47(8)  | 35(7)  | 46(8)  | 19(6)  | 13(7)  | 6(6)   |
| C(106) | 58(10) | 33(7)  | 57(10) | 21(7)  | -5(8)  | 9(7)   |
| C(107) | 53(9)  | 27(7)  | 42(8)  | 9(6)   | 13(6)  | 16(6)  |
| C(108) | 31(7)  | 41(8)  | 45(8)  | 23(6)  | 11(6)  | 10(6)  |
| C(109) | 29(7)  | 46(8)  | 38(7)  | -5(6)  | -6(5)  | 8(6)   |
| C(110) | 33(7)  | 64(10) | 42(8)  | 3(7)   | 2(6)   | 14(7)  |
| C(111) | 25(6)  | 47(8)  | 51(8)  | -18(7) | 5(6)   | 19(6)  |
| C(112) | 26(6)  | 39(7)  | 38(7)  | -6(6)  | -3(5)  | 15(5)  |
| C(113) | 39(7)  | 31(7)  | 47(8)  | -9(6)  | -19(6) | 0(6)   |
| C(114) | 43(8)  | 45(8)  | 43(8)  | -12(7) | 5(6)   | -12(7) |
| C(115) | 39(7)  | 38(7)  | 40(7)  | 0(6)   | 4(6)   | -6(6)  |
| C(116) | 35(7)  | 49(9)  | 47(8)  | 3(7)   | -2(6)  | -6(6)  |
| C(117) | 32(7)  | 44(8)  | 28(6)  | -10(6) | -2(5)  | 3(6)   |
| C(118) | 29(7)  | 40(7)  | 43(8)  | -11(6) | -6(6)  | 4(6)   |
| C(119) | 26(6)  | 71(10) | 35(7)  | -30(7) | -16(5) | 12(7)  |
| C(120) | 44(8)  | 58(10) | 40(8)  | 3(7)   | -19(7) | -8(7)  |
| C(121) | 32(7)  | 38(7)  | 40(7)  | -2(6)  | -8(6)  | 14(6)  |
| C(122) | 41(8)  | 49(9)  | 45(8)  | -14(7) | 11(6)  | 14(7)  |

|        |       |       |        |        |        |        |
|--------|-------|-------|--------|--------|--------|--------|
| C(123) | 27(7) | 40(8) | 64(10) | 11(7)  | -25(6) | -4(6)  |
| C(124) | 32(7) | 49(8) | 37(7)  | -15(6) | -4(6)  | 13(6)  |
| C(125) | 31(7) | 34(7) | 43(7)  | 2(6)   | 0(6)   | 14(5)  |
| C(126) | 36(7) | 30(7) | 52(8)  | 20(6)  | -5(6)  | 1(6)   |
| C(127) | 37(7) | 27(7) | 56(9)  | 14(6)  | -9(6)  | 11(6)  |
| C(128) | 43(8) | 38(8) | 50(8)  | 8(6)   | 9(7)   | 15(6)  |
| C(129) | 31(6) | 39(7) | 30(6)  | 4(5)   | 7(5)   | -10(5) |
| C(130) | 30(6) | 34(7) | 36(7)  | 19(5)  | -15(5) | -9(5)  |
| C(131) | 35(7) | 36(7) | 59(9)  | 8(7)   | 28(7)  | -11(6) |
| C(132) | 41(7) | 32(7) | 35(7)  | -2(5)  | 14(6)  | 10(6)  |
| C(133) | 39(8) | 41(8) | 46(8)  | -7(6)  | 12(6)  | 3(6)   |
| C(134) | 37(7) | 20(6) | 46(8)  | 11(5)  | -8(6)  | -9(5)  |
| C(135) | 43(8) | 52(9) | 46(8)  | 14(7)  | 4(7)   | 2(7)   |
| C(136) | 47(8) | 38(8) | 44(8)  | 11(6)  | -1(6)  | 22(6)  |
| C(137) | 30(7) | 50(9) | 46(8)  | 12(7)  | 6(6)   | -8(6)  |
| C(138) | 34(7) | 52(9) | 42(8)  | 17(7)  | 18(6)  | 15(6)  |
| C(139) | 42(8) | 42(8) | 35(7)  | -18(6) | 7(6)   | 6(6)   |
| C(140) | 42(8) | 28(7) | 46(8)  | -14(6) | -3(6)  | -15(6) |
| C(141) | 45(8) | 24(6) | 40(7)  | -6(5)  | 12(6)  | -9(6)  |
| C(142) | 35(7) | 51(8) | 28(6)  | 13(6)  | -7(5)  | 24(6)  |
| C(143) | 40(8) | 30(7) | 47(8)  | -1(6)  | 13(6)  | -9(6)  |
| C(144) | 36(7) | 36(7) | 32(7)  | -7(5)  | 7(5)   | -11(6) |
| C(145) | 48(8) | 28(7) | 41(7)  | -11(6) | 11(6)  | -8(6)  |
| C(146) | 46(8) | 33(7) | 38(7)  | 8(6)   | 6(6)   | 10(6)  |
| C(147) | 54(9) | 41(8) | 28(6)  | 0(6)   | 23(6)  | -2(6)  |
| C(148) | 37(7) | 37(7) | 33(7)  | -5(5)  | 20(6)  | 5(6)   |
| C(149) | 45(8) | 34(7) | 37(7)  | -7(6)  | 19(6)  | -2(6)  |
| C(150) | 36(7) | 39(7) | 41(7)  | -3(6)  | 15(6)  | -7(6)  |
| C(151) | 36(7) | 32(7) | 44(8)  | -5(6)  | 11(6)  | 7(6)   |
| C(152) | 36(7) | 48(8) | 38(7)  | 8(6)   | 13(6)  | -13(6) |

|        |       |       |       |        |        |        |
|--------|-------|-------|-------|--------|--------|--------|
| C(153) | 37(7) | 43(8) | 38(7) | -9(6)  | 9(6)   | -10(6) |
| C(154) | 35(7) | 34(7) | 37(7) | -5(6)  | 7(6)   | -2(6)  |
| C(155) | 32(6) | 26(6) | 33(6) | 6(5)   | 2(5)   | 7(5)   |
| C(156) | 50(9) | 39(8) | 45(8) | -15(6) | 17(7)  | -17(7) |
| C(157) | 47(8) | 33(7) | 43(8) | -11(6) | 16(6)  | -9(6)  |
| C(158) | 47(8) | 33(7) | 34(7) | 5(6)   | 8(6)   | -5(6)  |
| C(159) | 42(8) | 38(7) | 38(7) | -8(6)  | 10(6)  | -7(6)  |
| C(160) | 42(8) | 40(8) | 40(7) | 15(6)  | 12(6)  | -5(6)  |
| C(161) | 42(7) | 25(6) | 38(7) | -6(5)  | 10(6)  | 1(5)   |
| C(162) | 38(7) | 36(7) | 41(7) | 15(6)  | 7(6)   | -14(6) |
| C(163) | 38(7) | 42(8) | 36(7) | -21(6) | 7(6)   | -14(6) |
| C(164) | 36(7) | 31(7) | 41(7) | 6(6)   | 2(6)   | -13(5) |
| C(165) | 36(7) | 37(7) | 44(8) | 6(6)   | 8(6)   | -4(6)  |
| C(166) | 39(7) | 37(7) | 40(7) | 1(6)   | 11(6)  | 6(6)   |
| C(167) | 44(8) | 33(7) | 40(7) | -15(6) | 16(6)  | -1(6)  |
| C(168) | 44(8) | 39(8) | 40(7) | -13(6) | 9(6)   | -7(6)  |
| C(169) | 42(8) | 42(8) | 38(7) | -17(6) | -17(6) | -7(6)  |
| C(170) | 39(8) | 36(8) | 55(9) | -18(7) | -6(7)  | 6(6)   |
| C(171) | 41(7) | 38(7) | 33(7) | -4(6)  | 11(6)  | -10(6) |
| C(172) | 39(7) | 36(7) | 41(7) | -16(6) | -10(6) | -13(6) |
| C(173) | 37(7) | 35(7) | 39(7) | -5(6)  | 5(6)   | -15(6) |
| C(174) | 46(8) | 29(7) | 33(7) | -1(5)  | 11(6)  | -5(6)  |
| C(175) | 37(7) | 47(8) | 36(7) | -7(6)  | 8(6)   | 7(6)   |
| C(176) | 22(6) | 46(8) | 36(7) | -8(6)  | 4(5)   | -4(5)  |
| S(1)   | 31(2) | 31(2) | 34(2) | 7(1)   | 9(1)   | -9(1)  |
| S(2)   | 31(2) | 31(2) | 32(2) | 5(1)   | 6(1)   | -6(1)  |
| S(3)   | 30(2) | 32(2) | 29(2) | 7(1)   | 5(1)   | -6(1)  |
| S(4)   | 31(2) | 34(2) | 29(2) | -6(1)  | 9(1)   | 5(1)   |
| S(5)   | 30(2) | 35(2) | 30(2) | 7(1)   | -4(1)  | 7(1)   |
| S(6)   | 33(2) | 26(2) | 30(2) | -2(1)  | -2(1)  | 8(1)   |

|       |       |       |       |        |        |        |
|-------|-------|-------|-------|--------|--------|--------|
| S(7)  | 30(2) | 33(2) | 33(2) | -3(1)  | 13(1)  | 9(1)   |
| S(8)  | 35(2) | 29(2) | 34(2) | -8(1)  | 11(1)  | 10(1)  |
| S(9)  | 29(2) | 36(2) | 30(2) | -4(1)  | -2(1)  | -7(1)  |
| S(10) | 35(2) | 31(2) | 26(1) | 5(1)   | 6(1)   | -7(1)  |
| S(11) | 34(2) | 32(2) | 31(2) | -4(1)  | 7(1)   | -9(1)  |
| S(12) | 34(2) | 31(2) | 31(2) | -8(1)  | 7(1)   | -7(1)  |
| S(13) | 32(2) | 28(2) | 31(2) | -1(1)  | -3(1)  | 7(1)   |
| S(14) | 30(2) | 30(2) | 30(2) | -10(1) | -10(1) | -10(1) |
| S(15) | 31(2) | 34(2) | 32(2) | -6(1)  | -4(1)  | -4(1)  |
| S(16) | 33(2) | 30(2) | 30(2) | -8(1)  | 8(1)   | -7(1)  |
| S(17) | 29(2) | 31(2) | 31(2) | 6(1)   | 6(1)   | -6(1)  |
| S(18) | 31(2) | 33(2) | 32(2) | -5(1)  | -3(1)  | -6(1)  |
| S(19) | 30(2) | 29(2) | 36(2) | -8(1)  | 9(1)   | 8(1)   |
| S(20) | 31(2) | 28(2) | 35(2) | -8(1)  | 11(1)  | 6(1)   |
| S(21) | 31(2) | 34(2) | 35(2) | -6(1)  | -5(1)  | -8(1)  |
| S(22) | 38(2) | 30(2) | 31(2) | 9(1)   | 4(1)   | 8(1)   |
| S(23) | 33(2) | 34(2) | 29(2) | -7(1)  | 8(1)   | -5(1)  |
| S(24) | 34(2) | 32(2) | 29(2) | 8(1)   | 10(1)  | -8(1)  |
| S(25) | 32(2) | 33(2) | 30(2) | 5(1)   | -8(1)  | 10(1)  |
| S(26) | 29(2) | 36(2) | 33(2) | 8(1)   | -3(1)  | 7(1)   |
| S(27) | 34(2) | 31(2) | 33(2) | 9(1)   | 7(1)   | 6(1)   |
| S(28) | 29(2) | 35(2) | 35(2) | -8(1)  | -6(1)  | 6(1)   |
| S(29) | 30(2) | 30(2) | 34(2) | -6(1)  | -4(1)  | 7(1)   |
| S(30) | 33(2) | 29(2) | 30(2) | -7(1)  | -3(1)  | 4(1)   |
| S(31) | 32(2) | 29(2) | 35(2) | 7(1)   | 6(1)   | 8(1)   |
| S(32) | 31(2) | 31(2) | 36(2) | 4(1)   | -5(1)  | 10(1)  |

---
